# Supplementary material for: Discovery of Novel Polycyclic Polyprenylated Acylphloroglucinols from the Fruits of Garcinia xanthochymus as Antitumor Agents by Suppressing the STAT3 Signaling
Source: MDPI journal article supplement (doi:10.3390/ijms221910365), 2021-09-26
Supplement: s1 [file s1]

## Supplementary Information

### Discovery of Novel Polycyclic Polyprenylated Acylphloroglucinols from the Fruits of *Garcinia xanthochymus* as Antitumor Agents by Suppressing the STAT3 signaling

Shan Jin <sup>1,‡</sup>, Wen Wang <sup>1,‡</sup>, Fei Gan <sup>2</sup>, Wenli Xie <sup>1</sup>, Jing Xu <sup>1</sup>, Yu Chen <sup>2</sup>,  
Zhinan Mei <sup>1,\*</sup>, Guangzhong Yang <sup>1,\*</sup>

<sup>1</sup> School of Pharmaceutical Sciences, South-Central University for

Nationalities, Wuhan 430074, P. R. China

<sup>2</sup> College of Chemistry and Material Sciences, South-Central University for

Nationalities, Wuhan 430074, P. R. China

---

\*Corresponding authors. Tel./fax: +86 27 6784 1196

E-mail address: meizhinan@163.com (Z. Mei); yanggz888@126.com (G. Yang)

<sup>‡</sup>These authors contributed equally to this work.

## Contents

|                                                                                          |    |
|------------------------------------------------------------------------------------------|----|
| <b>Figure S1.</b> $^1\text{H}$ NMR spectrum of compound <b>3</b> .....                   | 5  |
| <b>Figure S2.</b> $^{13}\text{C}$ NMR spectrum of compound <b>3</b> .....                | 5  |
| <b>Figure S3.</b> $^1\text{H}$ $^1\text{H}$ COSY spectrum of compound <b>3</b> .....     | 6  |
| <b>Figure S4.</b> HSQC spectrum of compound <b>3</b> .....                               | 6  |
| <b>Figure S5.</b> HMBC spectrum of compound <b>3</b> .....                               | 7  |
| <b>Figure S6.</b> ROESY spectrum of compound <b>3</b> .....                              | 7  |
| <b>Figure S7.</b> HR-EI-MS spectrum of compound <b>3</b> .....                           | 8  |
| <b>Figure S8.</b> CD spectrum of compound <b>3</b> .....                                 | 8  |
| <b>Figure S9.</b> UV spectrum of compound <b>3</b> .....                                 | 9  |
| <b>Figure S10.</b> $^1\text{H}$ NMR spectrum of compound <b>5</b> .....                  | 9  |
| <b>Figure S11.</b> $^{13}\text{C}$ NMR spectrum of compound <b>5</b> .....               | 10 |
| <b>Figure S12.</b> $^1\text{H}$ $^1\text{H}$ COSY spectrum of compound <b>5</b> .....    | 10 |
| <b>Figure S13.</b> HSQC spectrum of compound <b>5</b> .....                              | 11 |
| <b>Figure S14.</b> HMBC spectrum of compound <b>5</b> .....                              | 11 |
| <b>Figure S15.</b> ROESY spectrum of compound <b>5</b> .....                             | 12 |
| <b>Figure S16.</b> HR-ESI-MS spectrum of compound <b>5</b> .....                         | 12 |
| <b>Figure S17.</b> CD spectrum of compound <b>5</b> .....                                | 13 |
| <b>Figure S18.</b> UV spectrum of compound <b>5</b> .....                                | 13 |
| <b>Figure S19.</b> $^1\text{H}$ NMR spectrum of compound <b>7</b> .....                  | 14 |
| <b>Figure S20.</b> $^{13}\text{C}$ NMR spectrum of compound <b>7</b> .....               | 14 |
| <b>Figure S21.</b> $^1\text{H}$ - $^1\text{H}$ COSY spectrum of compound <b>7</b> .....  | 15 |
| <b>Figure S22.</b> HSQC spectrum of compound <b>7</b> .....                              | 15 |
| <b>Figure S23.</b> HMBC spectrum of compound <b>7</b> .....                              | 16 |
| <b>Figure S24.</b> ROESY spectrum of compound <b>7</b> .....                             | 16 |
| <b>Figure S25.</b> HR-ESI-MS spectrum of compound <b>7</b> .....                         | 17 |
| <b>Figure S26.</b> CD spectrum of compound <b>7</b> .....                                | 17 |
| <b>Figure S27.</b> UV spectrum of compound <b>7</b> .....                                | 18 |
| <b>Figure S28.</b> $^1\text{H}$ NMR spectrum of compound <b>8</b> .....                  | 18 |
| <b>Figure S29.</b> $^{13}\text{C}$ NMR spectrum of compound <b>8</b> .....               | 19 |
| <b>Figure S30.</b> $^1\text{H}$ - $^1\text{H}$ COSY spectrum of compound <b>8</b> .....  | 19 |
| <b>Figure S31.</b> HSQC spectrum of compound <b>8</b> .....                              | 20 |
| <b>Figure S32.</b> HMBC spectrum of compound <b>8</b> .....                              | 20 |
| <b>Figure S33.</b> ROESY spectrum of compound <b>8</b> .....                             | 21 |
| <b>Figure S34.</b> HR-ESI-MS spectrum of compound <b>8</b> .....                         | 21 |
| <b>Figure S35.</b> CD spectrum of compound <b>8</b> .....                                | 22 |
| <b>Figure S36.</b> UV spectrum of compound <b>8</b> .....                                | 22 |
| <b>Figure S37.</b> $^1\text{H}$ NMR spectrum of compound <b>11</b> .....                 | 23 |
| <b>Figure S38.</b> $^{13}\text{C}$ NMR spectrum of compound <b>11</b> .....              | 23 |
| <b>Figure S39.</b> $^1\text{H}$ - $^1\text{H}$ COSY spectrum of compound <b>11</b> ..... | 24 |
| <b>Figure S40.</b> HSQC spectrum of compound <b>11</b> .....                             | 24 |
| <b>Figure S41.</b> HMBC spectrum of compound <b>11</b> .....                             | 25 |
| <b>Figure S42.</b> ROESY spectrum of compound <b>11</b> .....                            | 25 |

|                                                                                                                                                         |     |
|---------------------------------------------------------------------------------------------------------------------------------------------------------|-----|
| <b>Figure S43.</b> HR-ESI-MS spectrum of compound <b>11</b> .....                                                                                       | 26  |
| <b>Figure S44.</b> CD spectrum of compound <b>11</b> .....                                                                                              | 26  |
| <b>Figure S45.</b> UV spectrum of compound <b>11</b> .....                                                                                              | 27  |
| <b>Figure S46.</b> <sup>1</sup> H NMR spectrum of compound <b>15</b> .....                                                                              | 27  |
| <b>Figure S47.</b> <sup>13</sup> C NMR spectrum of compound <b>15</b> .....                                                                             | 28  |
| <b>Figure S48.</b> <sup>1</sup> H - <sup>1</sup> H COSY spectrum of compound <b>15</b> .....                                                            | 28  |
| <b>Figure S49.</b> HSQC spectrum of compound <b>15</b> .....                                                                                            | 29  |
| <b>Figure S50.</b> HMBC spectrum of compound <b>15</b> .....                                                                                            | 29  |
| <b>Figure S51.</b> ROESY spectrum of compound <b>15</b> .....                                                                                           | 30  |
| <b>Figure S52.</b> HR-ESI-MS spectrum of compound <b>15</b> .....                                                                                       | 30  |
| <b>Figure S53.</b> CD spectrum of compound <b>15</b> .....                                                                                              | 31  |
| <b>Figure S54.</b> UV spectrum of compound <b>15</b> .....                                                                                              | 31  |
| <b>Figure S55.</b> Chemical structure of compound <b>3</b> . .....                                                                                      | 32  |
| <b>Figure S56.</b> Chemical structure of compound <b>5</b> .....                                                                                        | 33  |
| <b>Figure S57.</b> Chemical structure of compound <b>7</b> .....                                                                                        | 33  |
| <b>Figure S58.</b> Chemical structure of compound <b>11</b> .....                                                                                       | 34  |
| <b>Figure S59.</b> Chemical structure of compound <b>15</b> .....                                                                                       | 35  |
| <b>Figure S60.</b> DP4+ probability for compounds <b>3a</b> and <b>3b</b> based on its <sup>1</sup> H and <sup>13</sup> C-NMR data. ....                | 144 |
| <b>Figure S61.</b> DP4+ probability for compounds <b>7a</b> and <b>7b</b> based on its <sup>1</sup> H and <sup>13</sup> C-NMR data. ....                | 146 |
| <b>Figure S62.</b> DP4+ probability for compounds <b>15a,15b,15c</b> and <b>15d</b> based on its <sup>1</sup> H and <sup>13</sup> C-NMR data. ....      | 148 |
| <b>Figure S63.</b> Calculated ECD spectra of compound <b>5</b> was compared with the experimental. ....                                                 | 151 |
| <b>Figure S64.</b> Calculated ECD spectra of compound <b>11</b> was compared with the experimental. ....                                                | 151 |
| <b>Figure S65.</b> Calculated ECD spectra of compound <b>15</b> was compared with the experimental. ....                                                | 152 |
| <b>Table S1.</b> Energies of configurations <b>3-15</b> .....                                                                                           | 38  |
| <b>Table S2.</b> Standard orientations of configurations <b>3-15</b> .....                                                                              | 41  |
| <b>Table S3.</b> Experimental and computed chemical shifts of <b>3, 3a</b> and <b>3b</b> . ....                                                         | 139 |
| <b>Table S4.</b> Experimental and computed chemical shifts of <b>7, 7a</b> and <b>7b</b> . ....                                                         | 140 |
| <b>Table S5.</b> Experimental and computed chemical shifts of <b>15,15a,15b,15c</b> and <b>15d</b> . ....                                               | 141 |
| <b>Table S6.</b> Statistics of Ordinary Least Squares Linear Regression (OLS-LR) of experimental and computed <sup>13</sup> C-NMR chemical shifts. .... | 142 |
| <b>Table S7.</b> <sup>1</sup> H-NMR and <sup>13</sup> C-NMR of compounds <b>1-2</b> (in pyridine- <i>d</i> <sub>5</sub> ) .....                         | 153 |
| <b>Table S8.</b> <sup>1</sup> H-NMR and <sup>13</sup> C-NMR of compound <b>4</b> (in pyridine- <i>d</i> <sub>5</sub> ) .....                            | 154 |
| <b>Table S9.</b> <sup>1</sup> H-NMR and <sup>13</sup> C-NMR of compound <b>6</b> (in pyridine- <i>d</i> <sub>5</sub> ) .....                            | 154 |
| <b>Table S10.</b> <sup>1</sup> H-NMR and <sup>13</sup> C-NMR of compound <b>9</b> and <b>10</b> (in pyridine- <i>d</i> <sub>5</sub> ) .....             | 154 |
| <b>Table S11.</b> <sup>1</sup> H-NMR and <sup>13</sup> C-NMR of compound <b>12</b> (in pyridine- <i>d</i> <sub>5</sub> ) .....                          | 156 |
| <b>Table S12.</b> <sup>1</sup> H-NMR and <sup>13</sup> C-NMR of compound <b>13</b> (in pyridine- <i>d</i> <sub>5</sub> ) .....                          | 156 |
| <b>Table S13.</b> <sup>1</sup> H-NMR and <sup>13</sup> C-NMR of compound <b>14</b> (in pyridine- <i>d</i> <sub>5</sub> ) .....                          | 157 |
| <b>1. Computational methods</b> .....                                                                                                                   | 32  |
| 1.1 Conformational analysis .....                                                                                                                       | 32  |
| 1.2 NMR calculation .....                                                                                                                               | 35  |
| 1.3 ECD calculation .....                                                                                                                               | 36  |
| 1.4 References .....                                                                                                                                    | 36  |
| <b>2. Energies and Coordinates</b> .....                                                                                                                | 38  |

|                                                                  |            |
|------------------------------------------------------------------|------------|
| 2.1 Energies at B3LYP theory level.....                          | 38         |
| 2.2 Coordinates at B3LYP theory level .....                      | 41         |
| <b>3. Experimental and Computed NMR Chemical Shifts .....</b>    | <b>138</b> |
| 3.1 <sup>13</sup> C- and <sup>1</sup> H-NMR chemical shifts..... | 138        |
| 3.2 DP4+ analysis .....                                          | 143        |
| <b>4.Experimental and calculated ECD spectra .....</b>           | <b>151</b> |

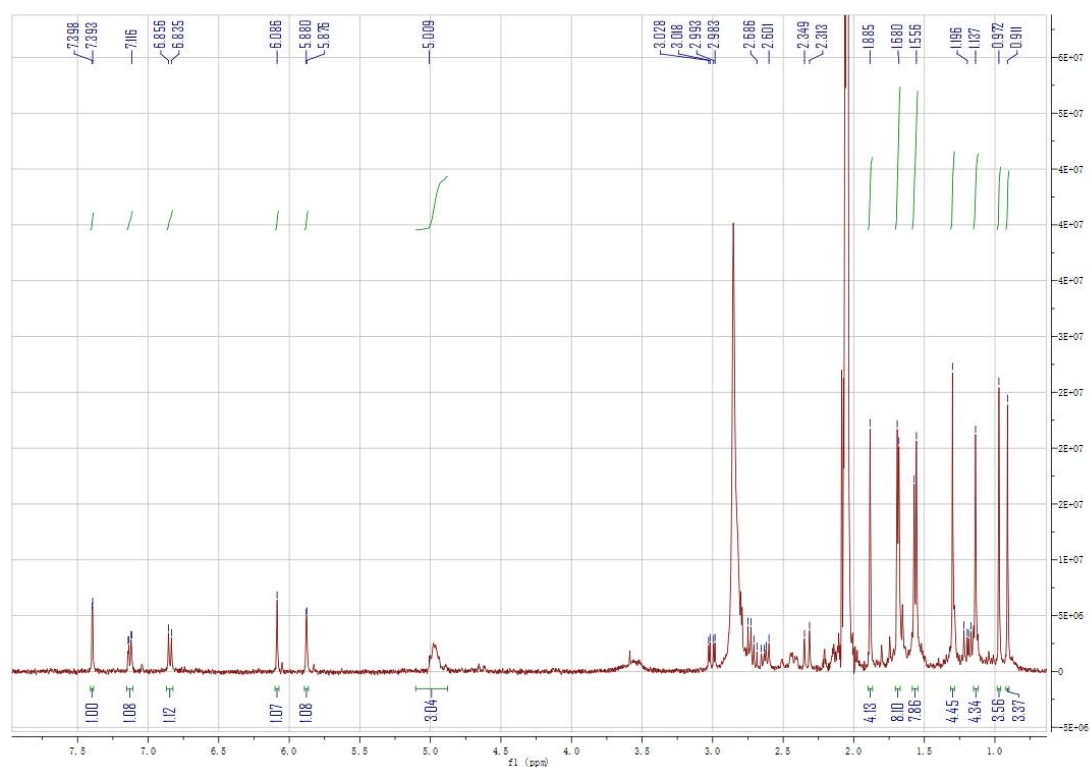

**Figure S1.**  $^1\text{H}$  NMR spectrum of compound **3**

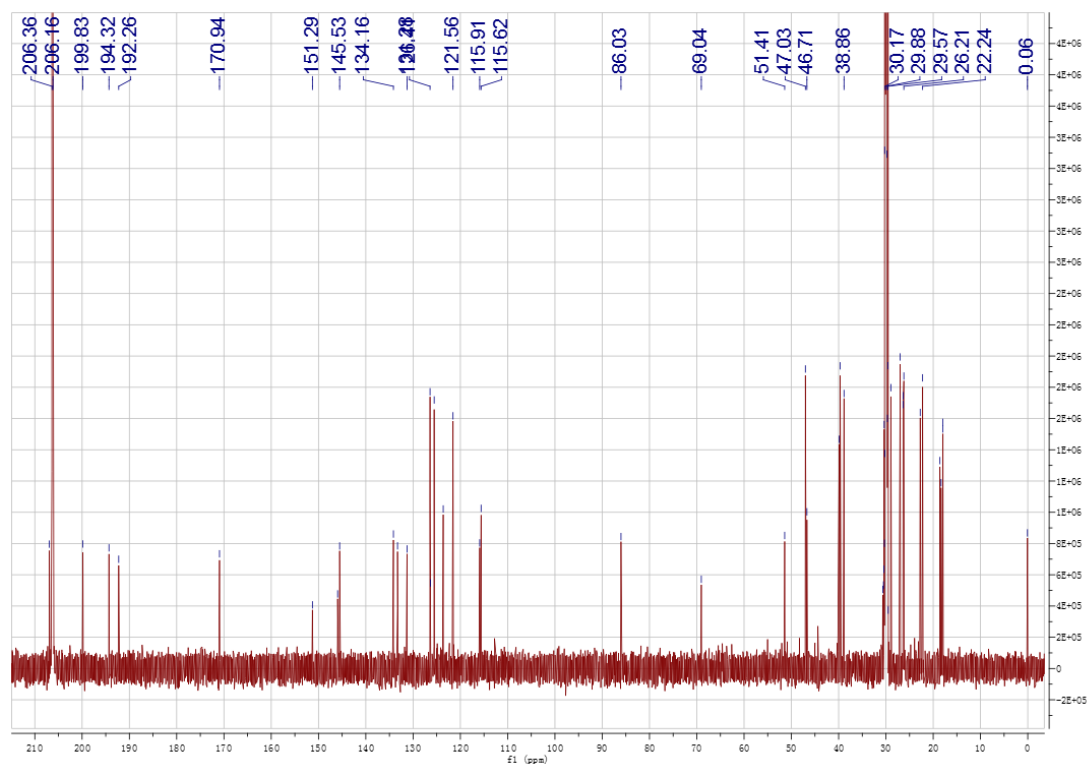

**Figure S2.**  $^{13}\text{C}$  NMR spectrum of compound **3**

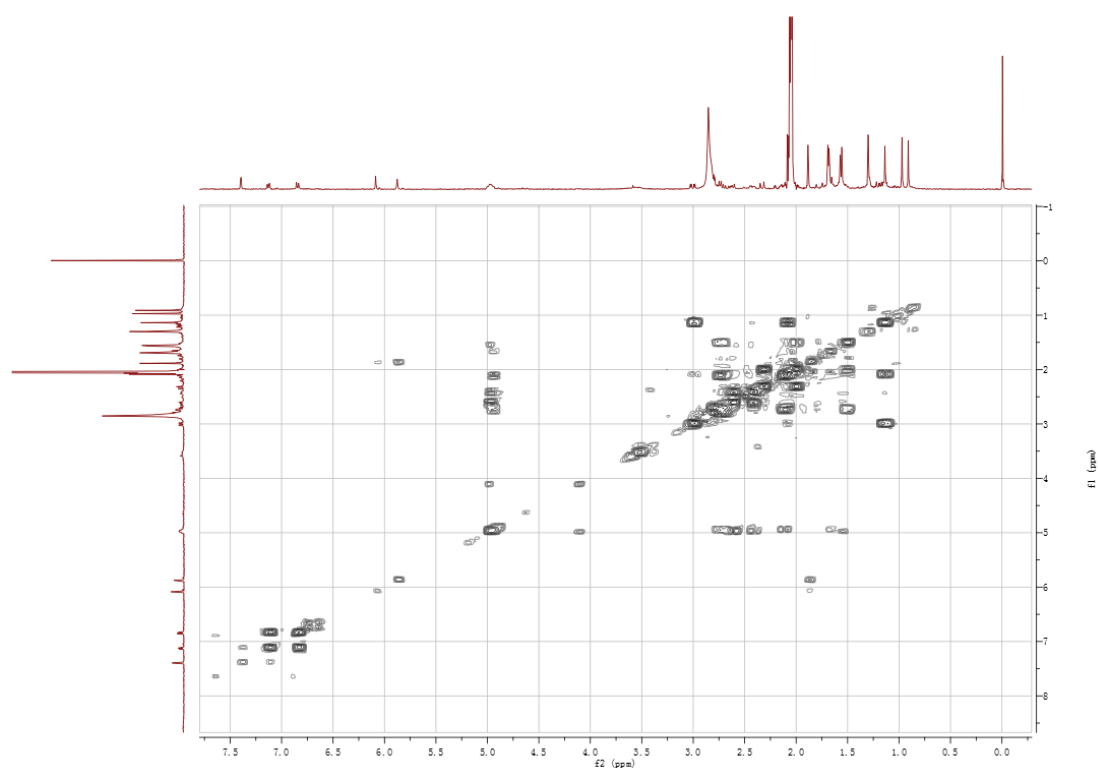

**Figure S3.**  $^1\text{H}$   $^1\text{H}$  COSY spectrum of compound **3**

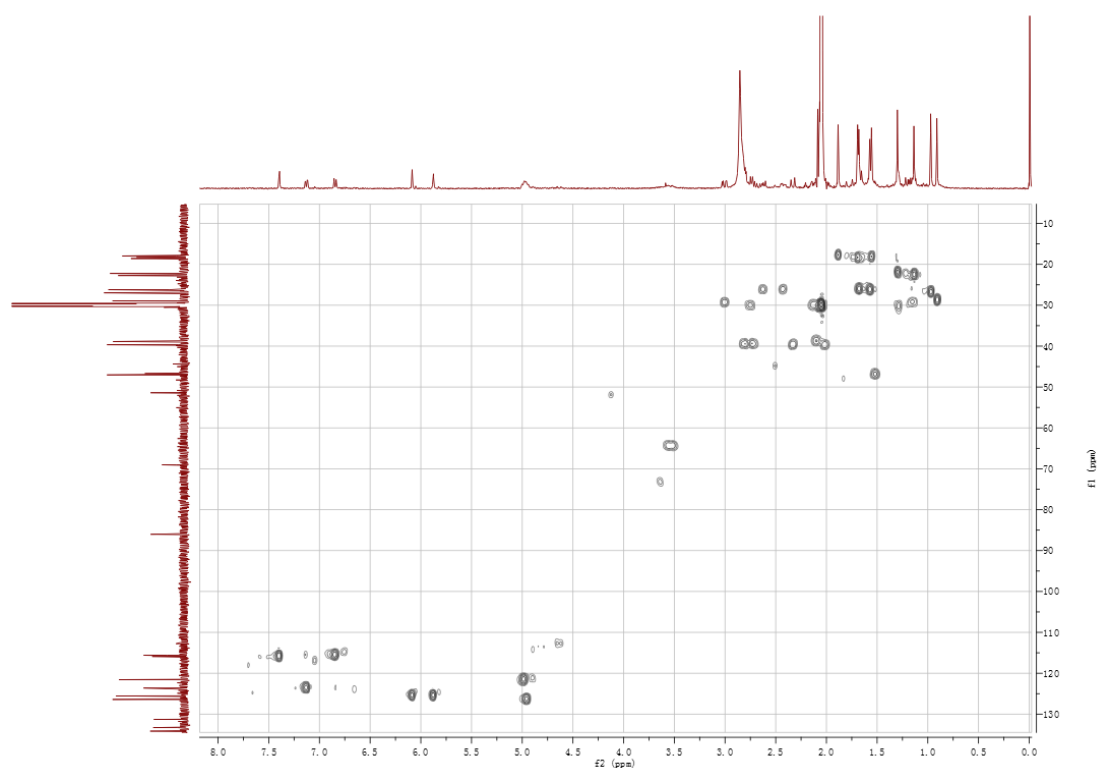

**Figure S4.** HSQC spectrum of compound **3**

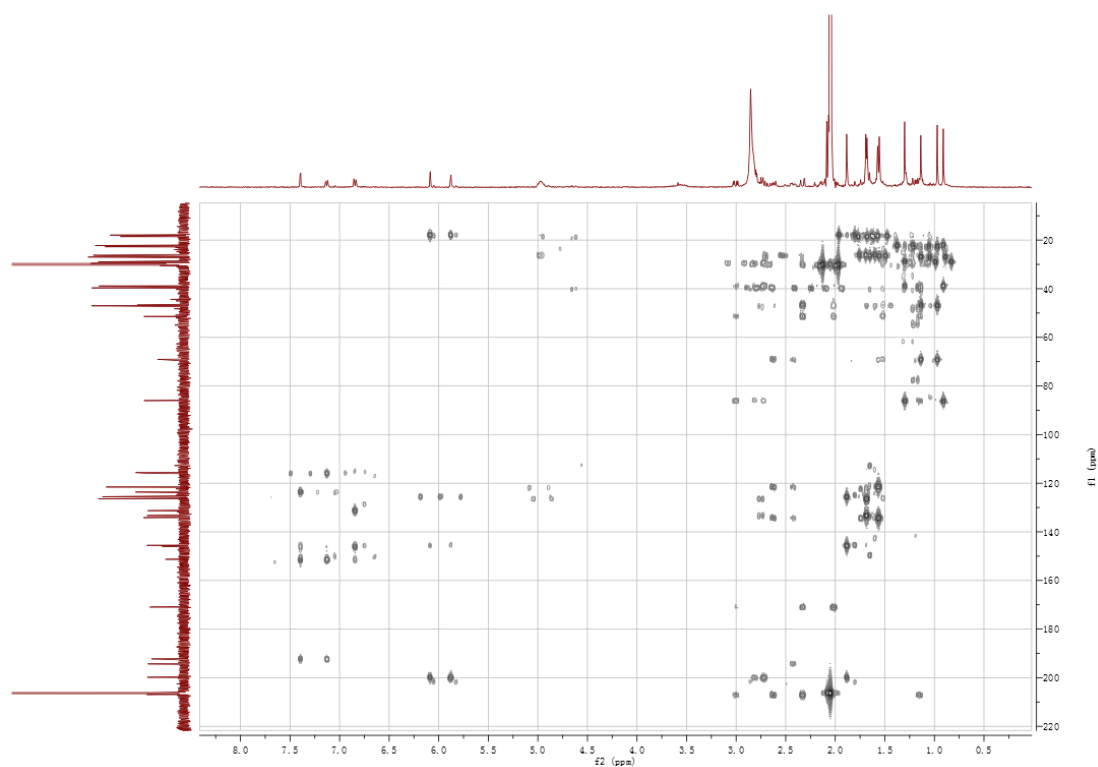

**Figure S5.** HMBC spectrum of compound **3**

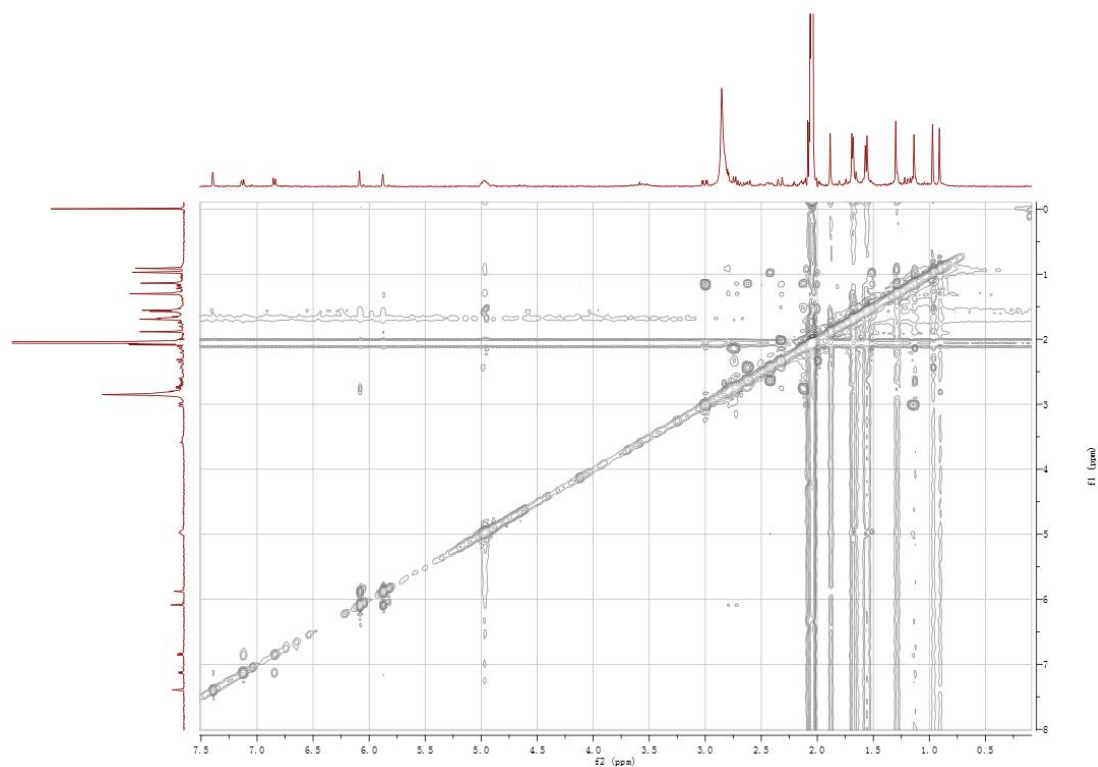

**Figure S6.** ROESY spectrum of compound **3**

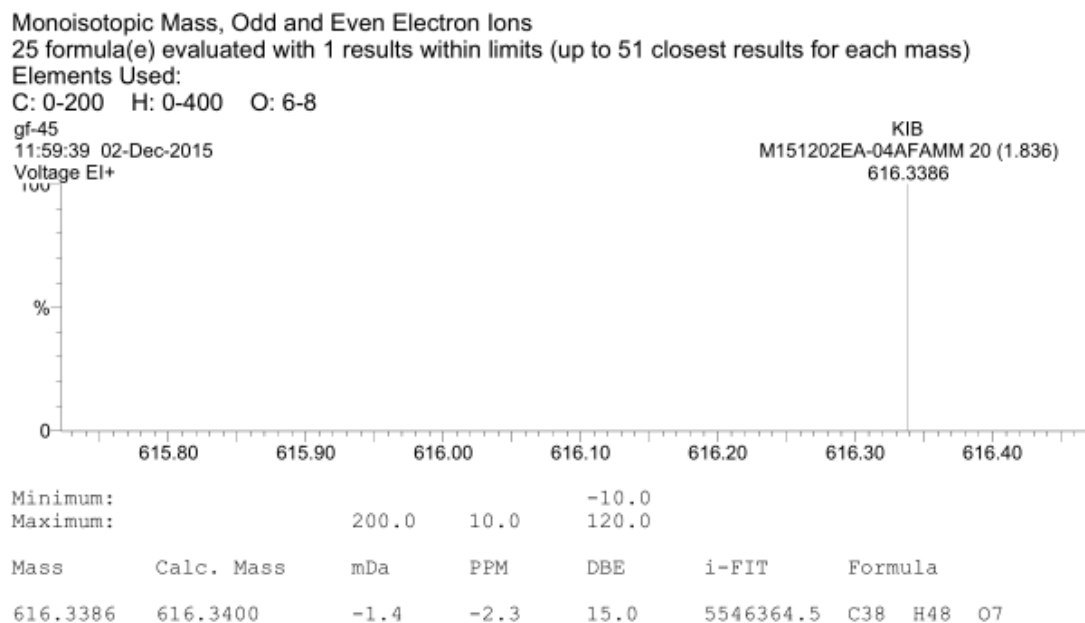

**Figure S7.** HR-EI-MS spectrum of compound **3**

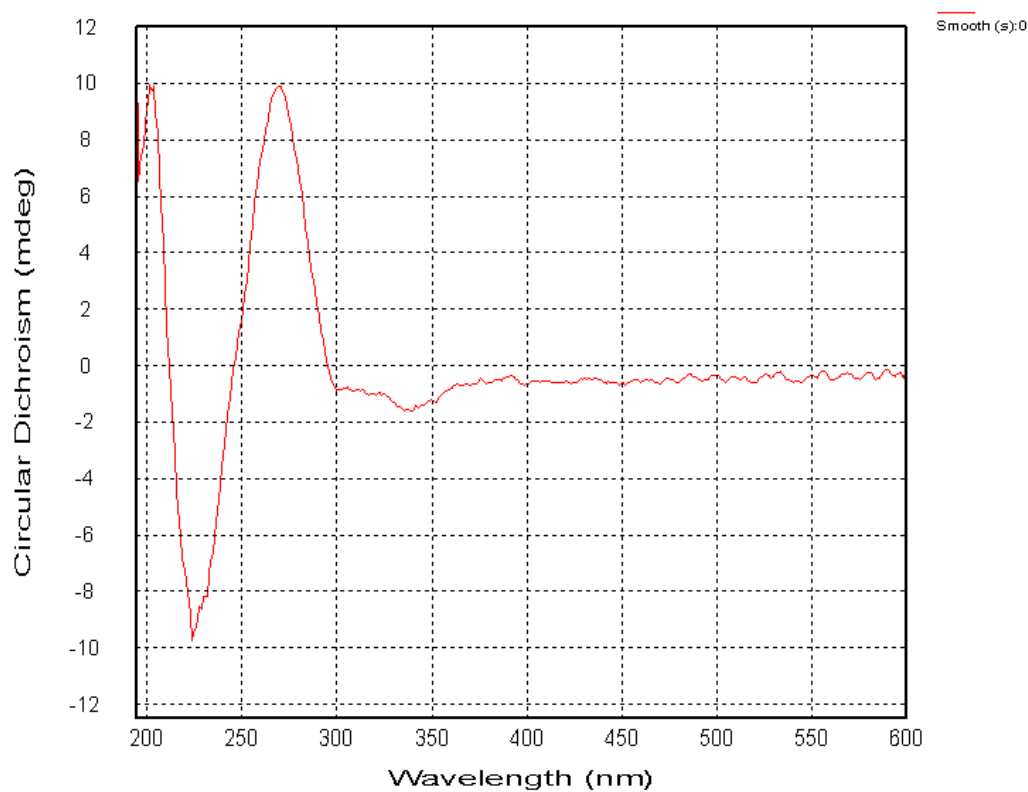

**Figure S8.** CD spectrum of compound **3**



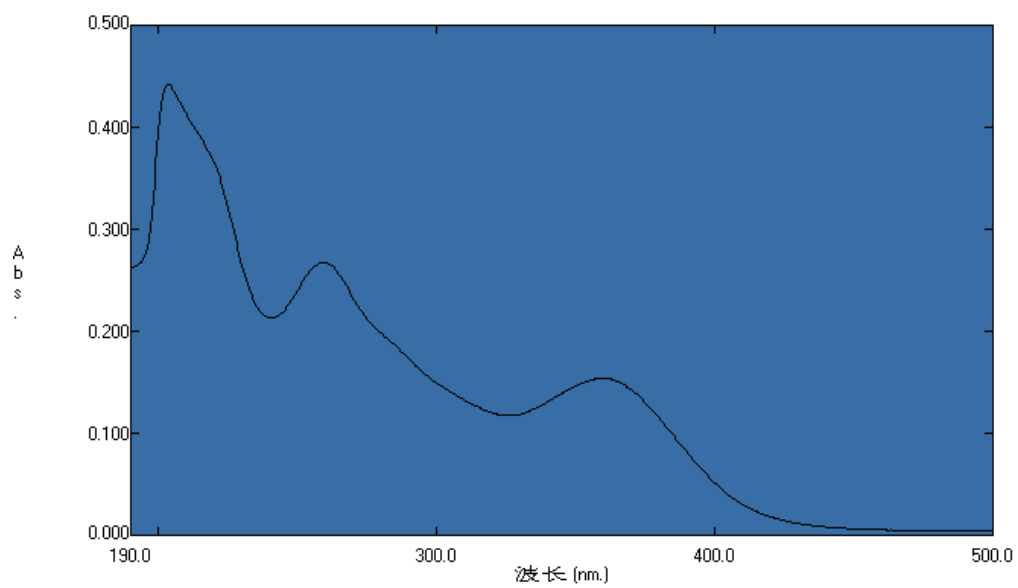

**Figure S9.** UV spectrum of compound **3**

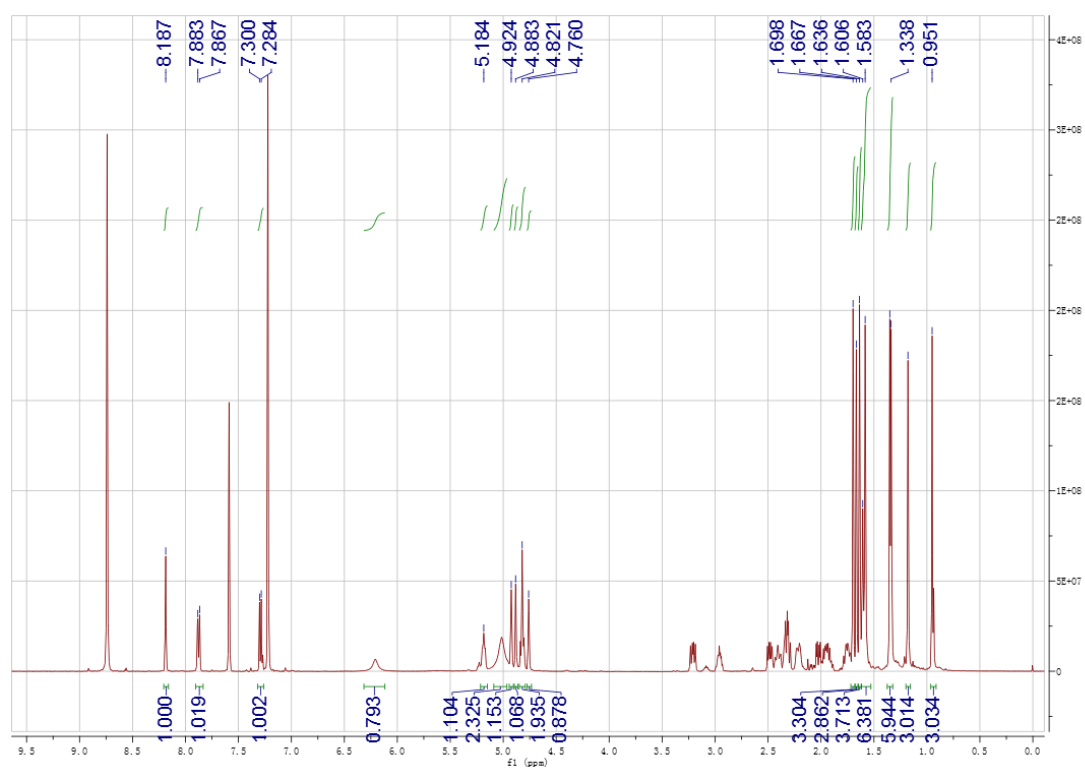

**Figure S10.**  $^1\text{H}$  NMR spectrum of compound **5**

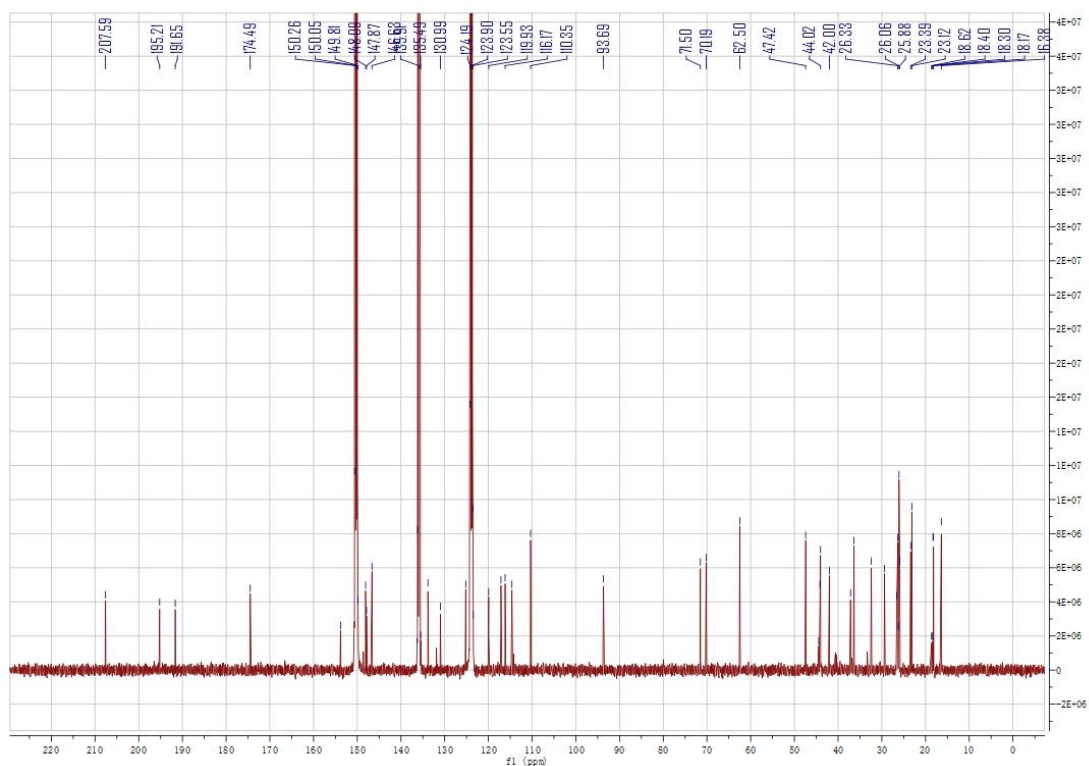

**Figure S11.**  $^{13}\text{C}$  NMR spectrum of compound **5**

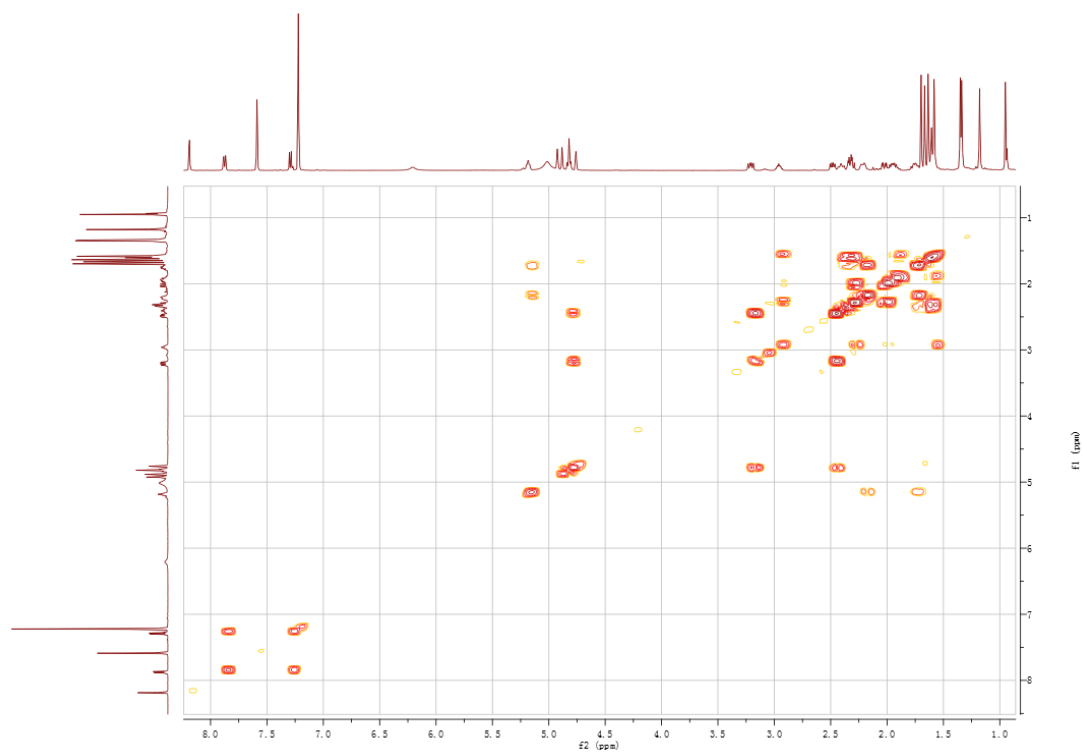

**Figure S12.**  $^1\text{H}$   $^1\text{H}$  COSY spectrum of compound **5**

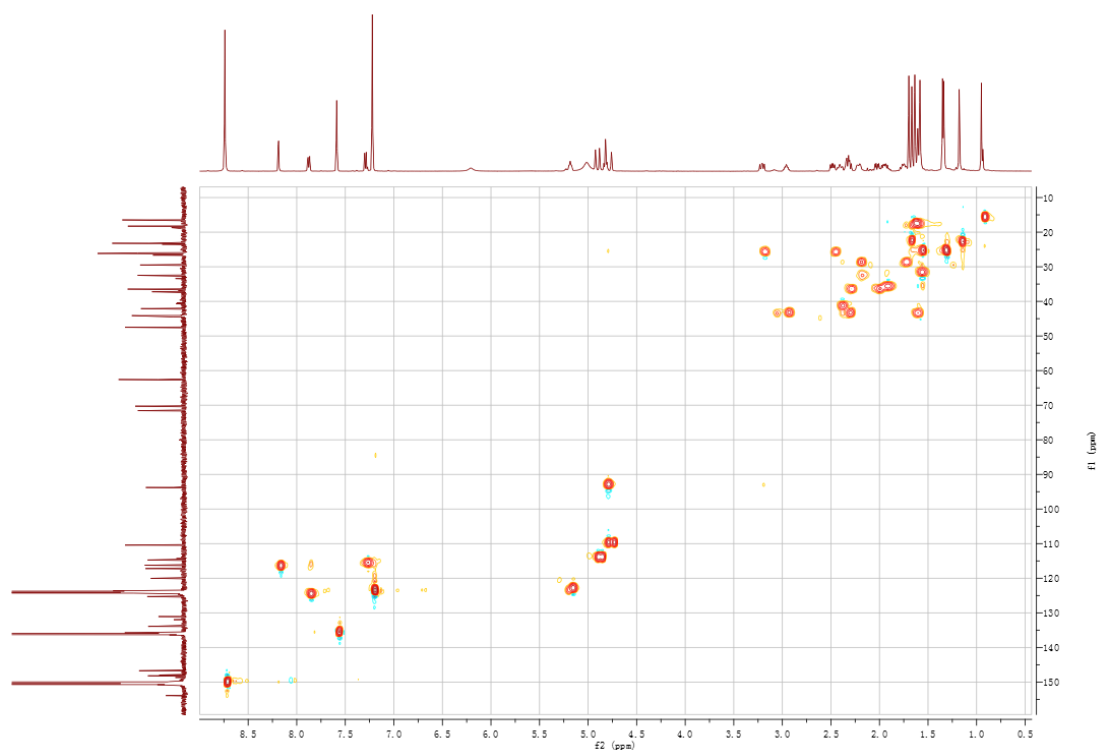

**Figure S13.** HSQC spectrum of compound **5**

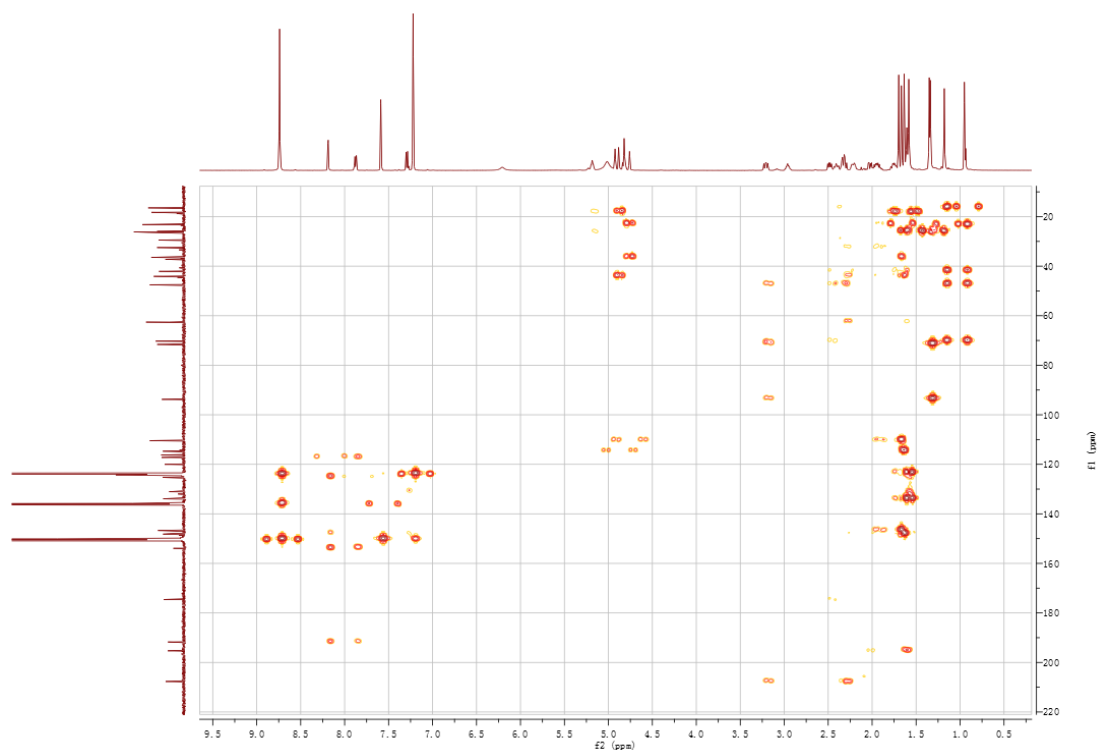

**Figure S14.** HMBC spectrum of compound **5**

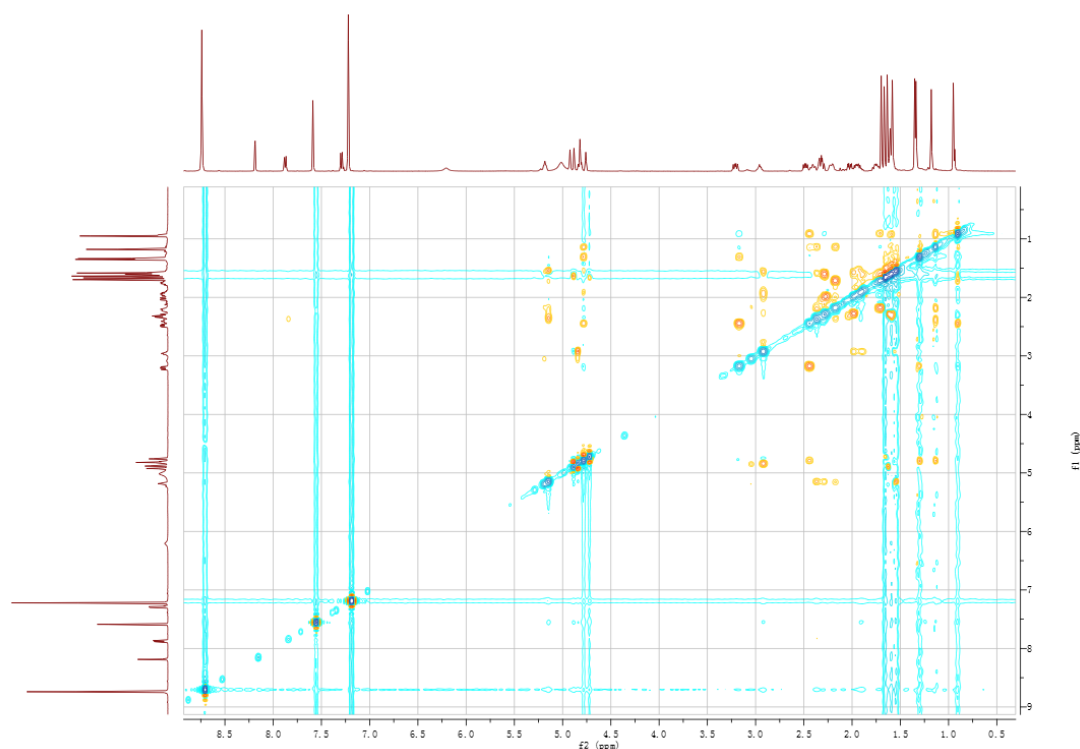

**Figure S15.** ROESY spectrum of compound **5**

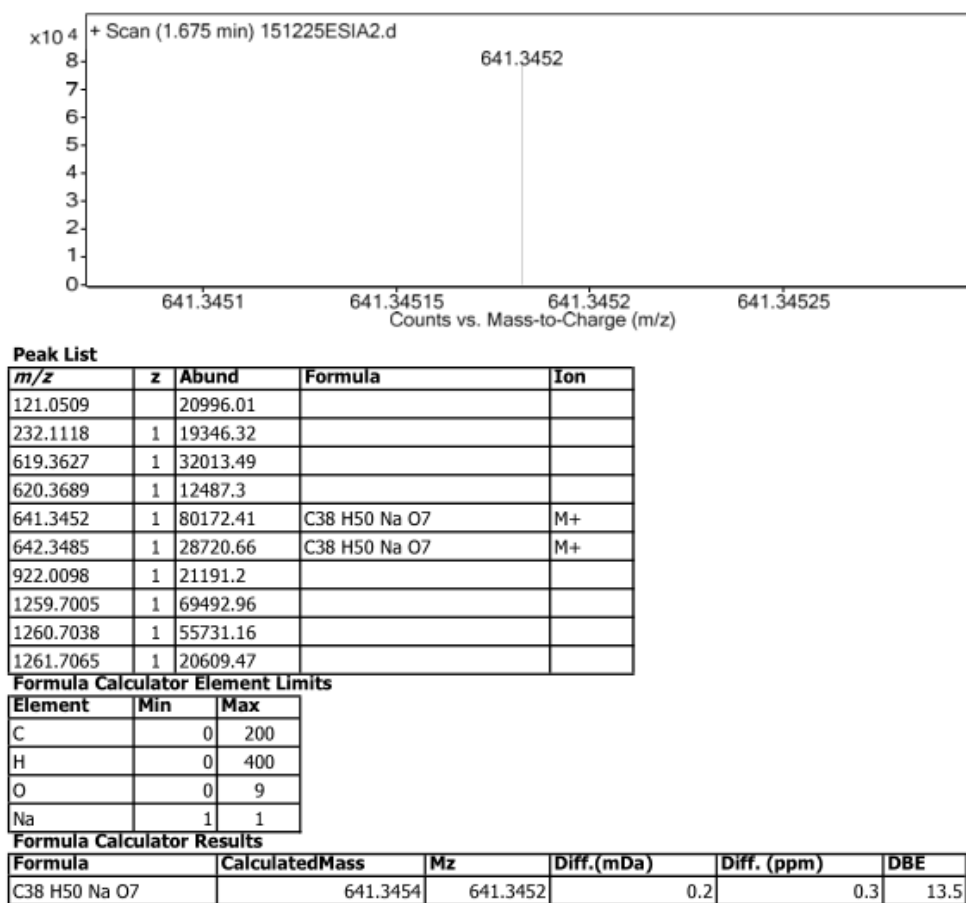

**Figure S16.** HR-ESI-MS spectrum of compound **5**

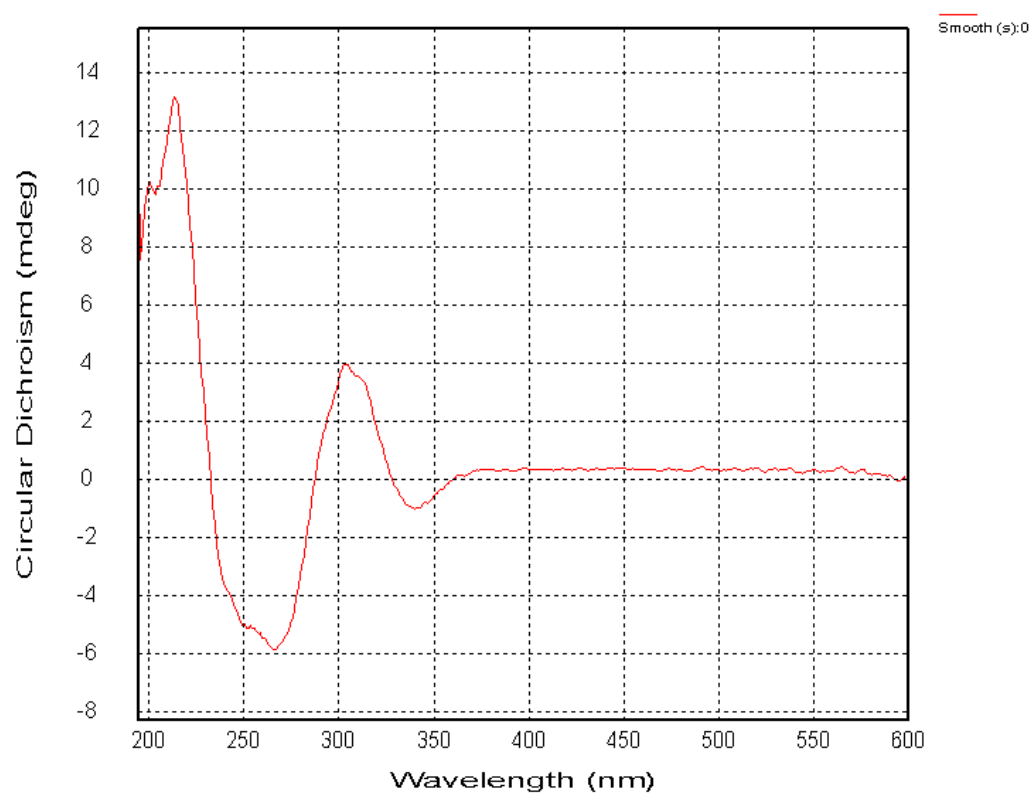

**Figure S17.** CD spectrum of compound **5**

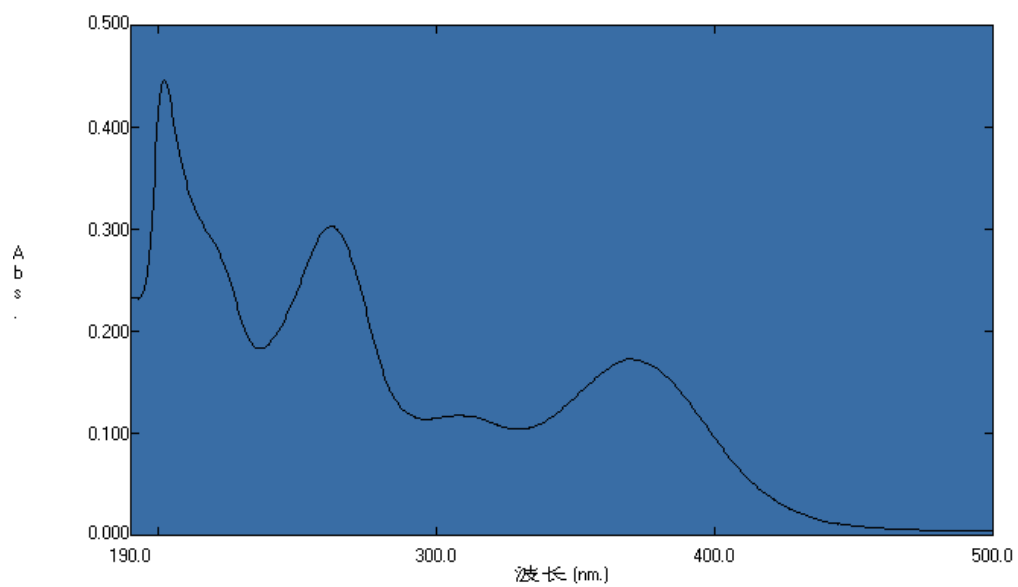

**Figure S18.** UV spectrum of compound **5**

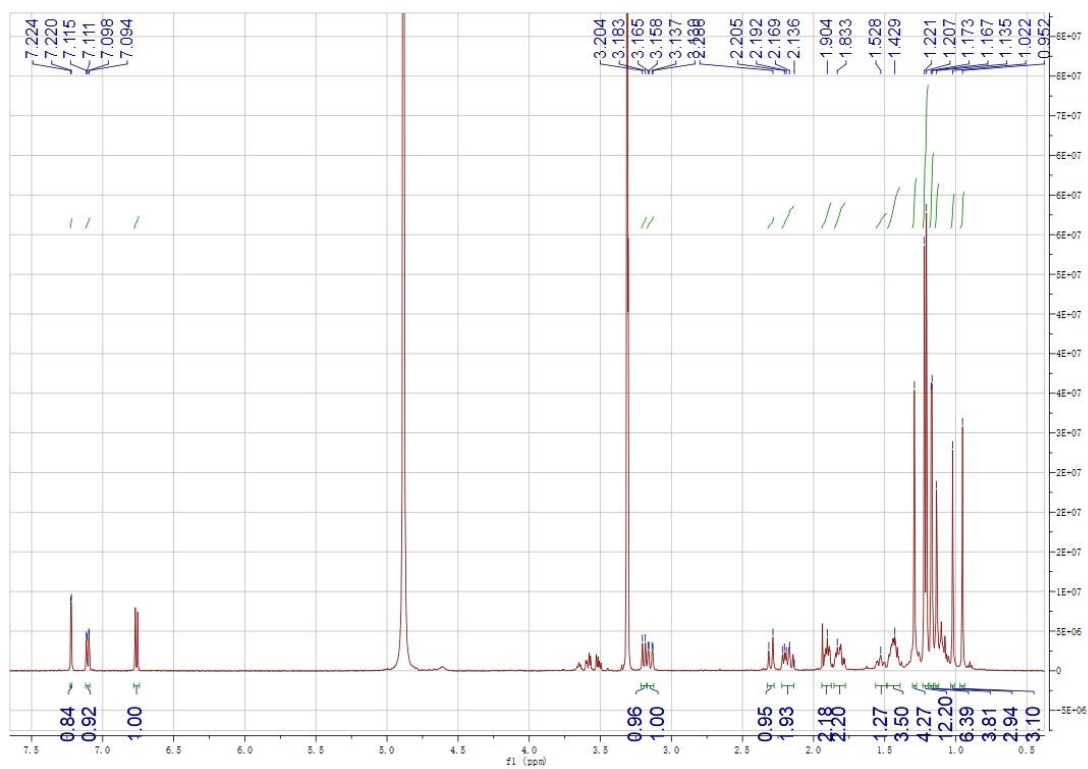

**Figure S19.**  $^1\text{H}$  NMR spectrum of compound **7**

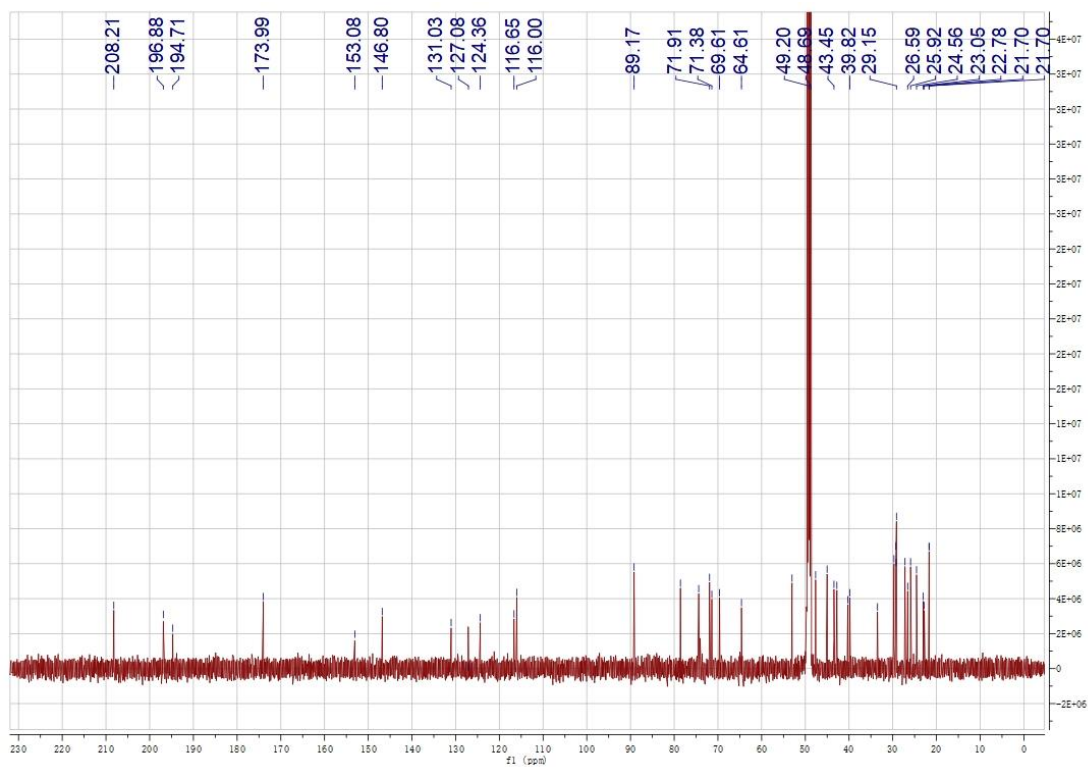

**Figure S20.**  $^{13}\text{C}$  NMR spectrum of compound **7**

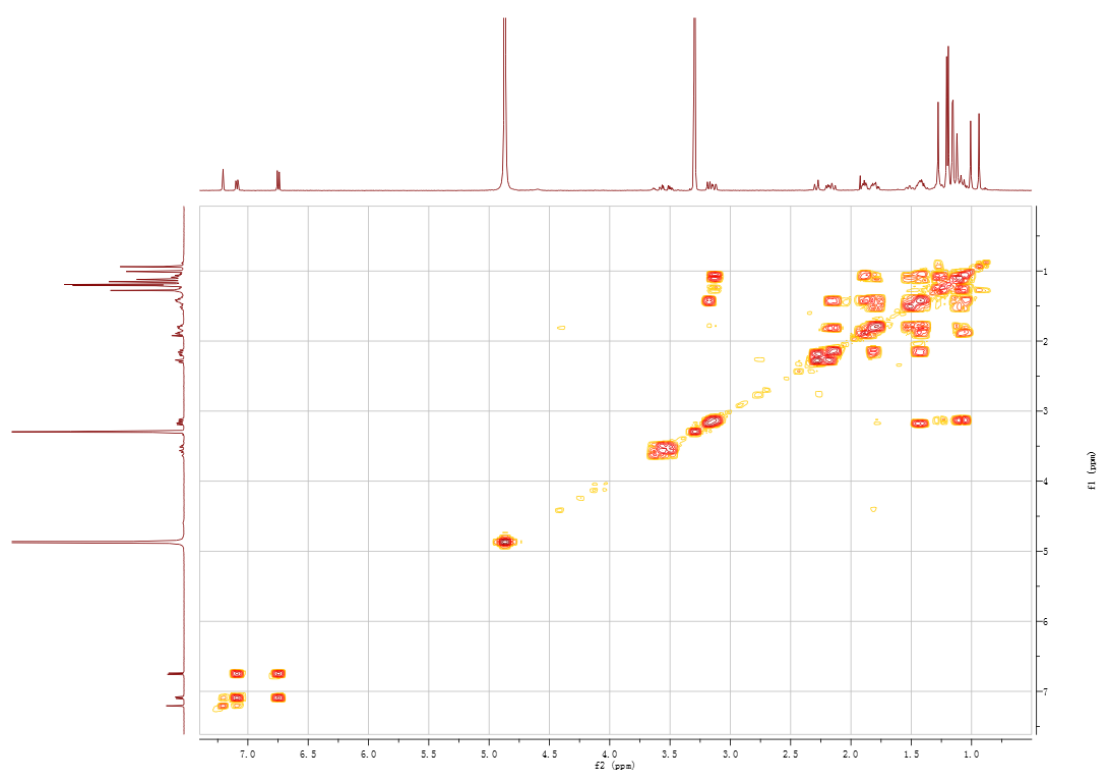

**Figure S21.**  $^1\text{H}$ - $^1\text{H}$  COSY spectrum of compound **7**

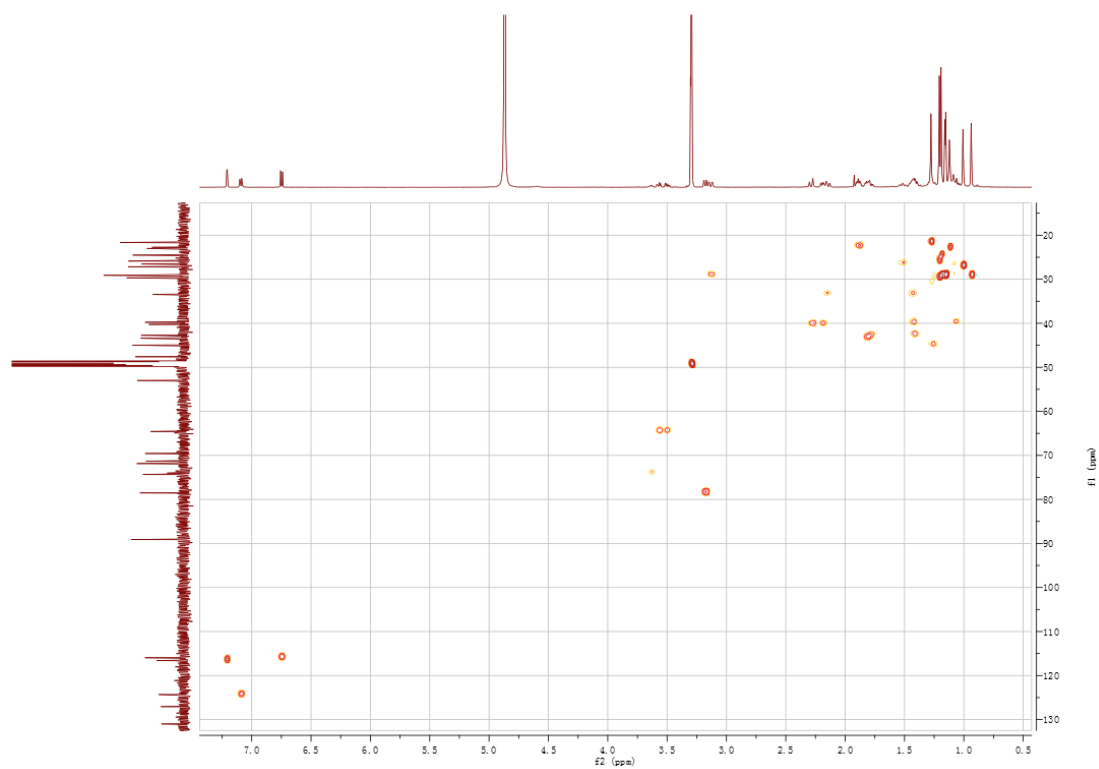

**Figure S22.** HSQC spectrum of compound **7**

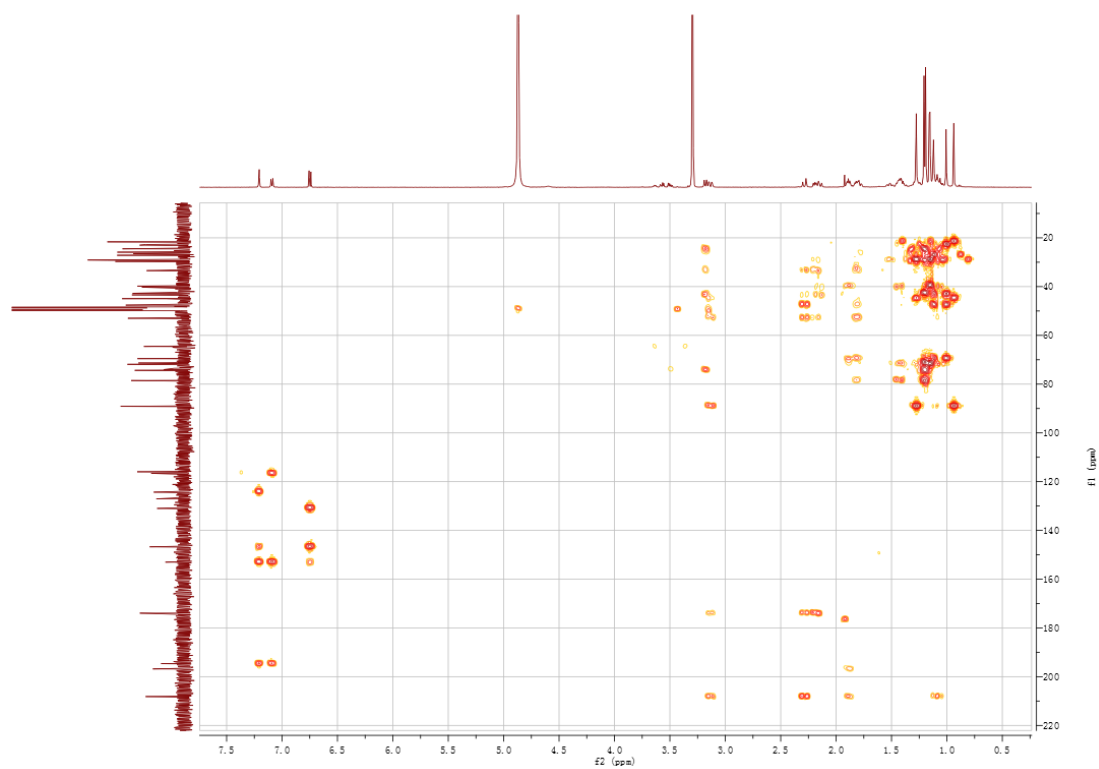

**Figure S23.** HMBC spectrum of compound **7**

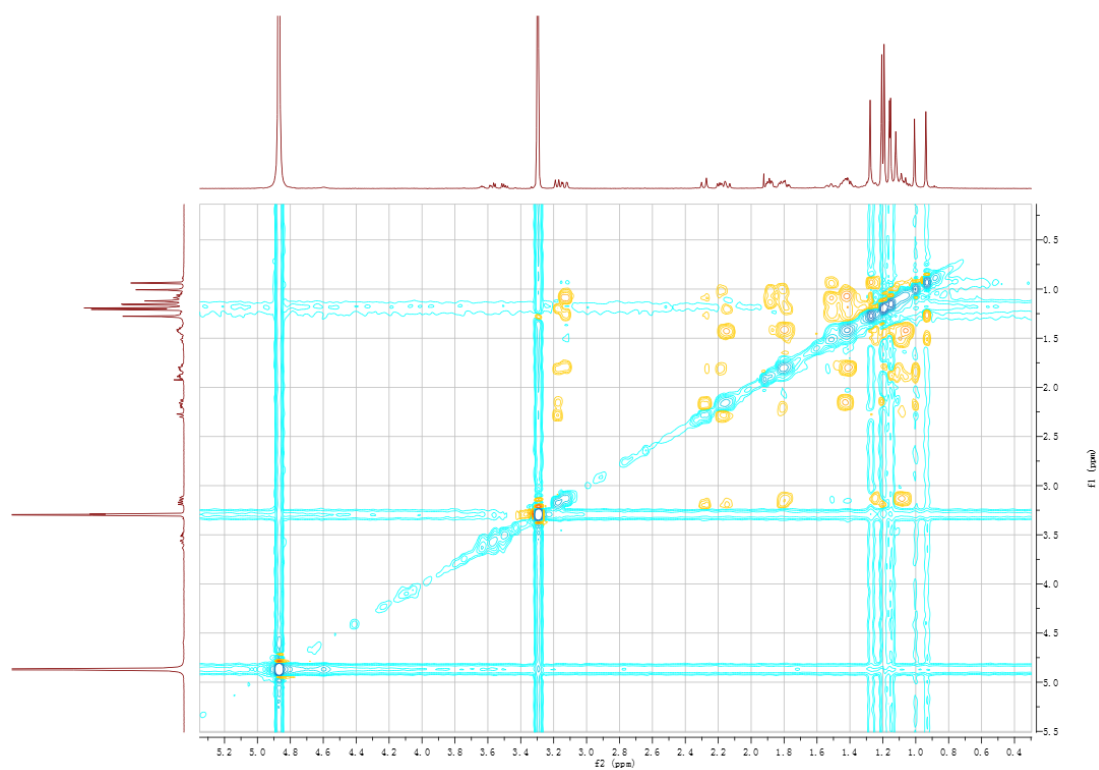

**Figure S24.** ROESY spectrum of compound **7**



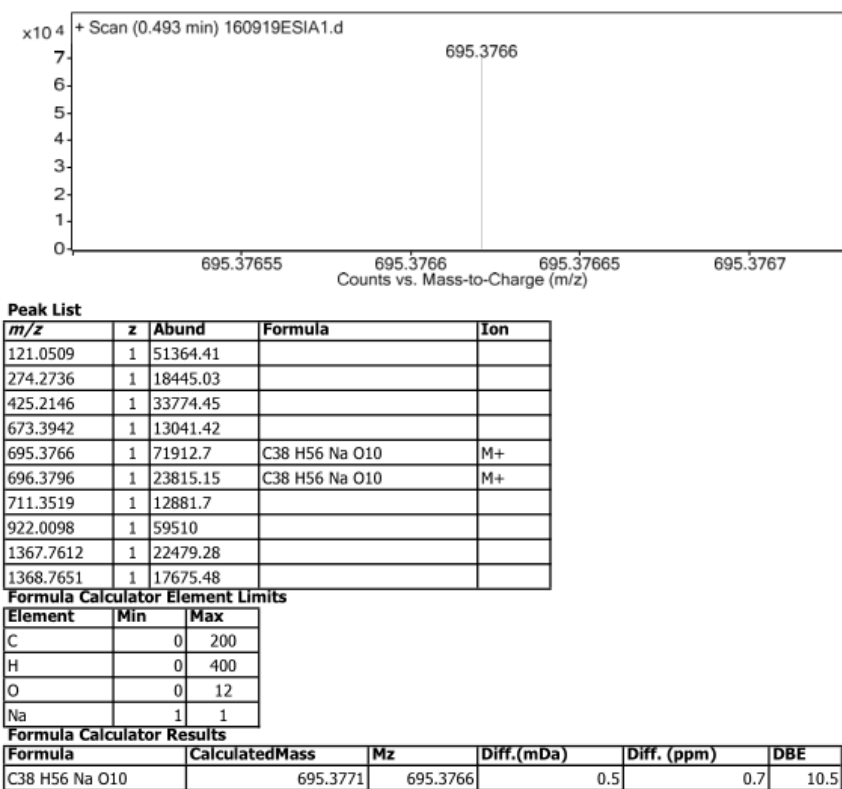

Figure S25. HR-ESI-MS spectrum of compound 7

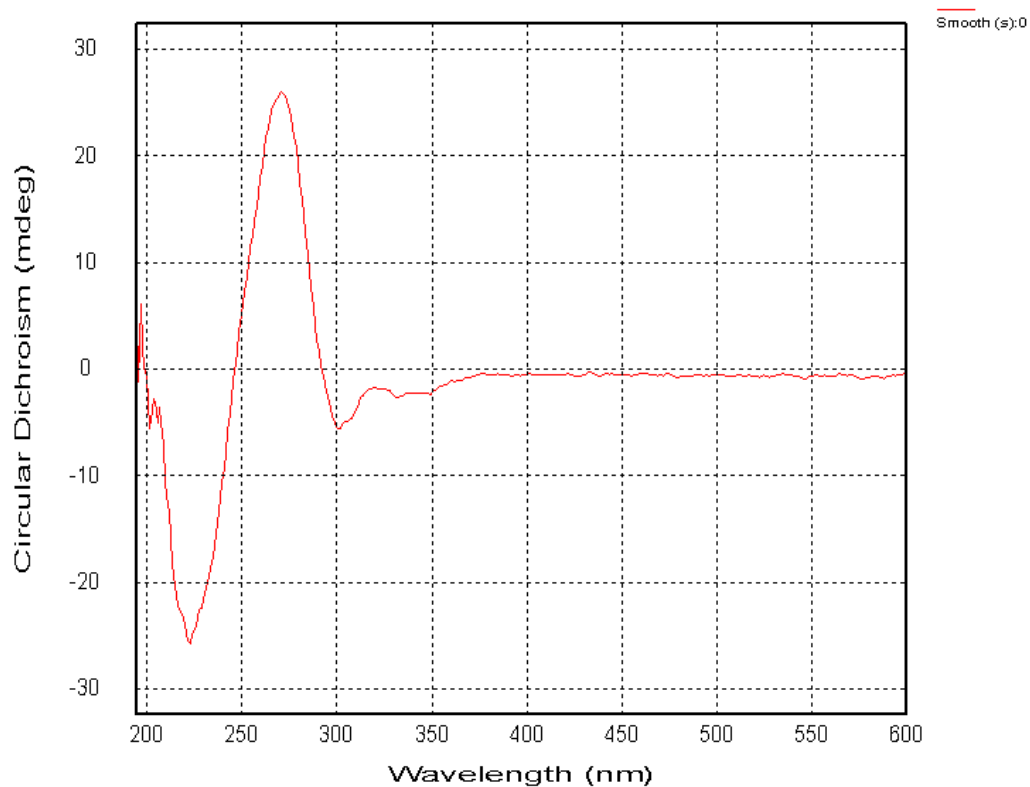

Figure S26. CD spectrum of compound 7

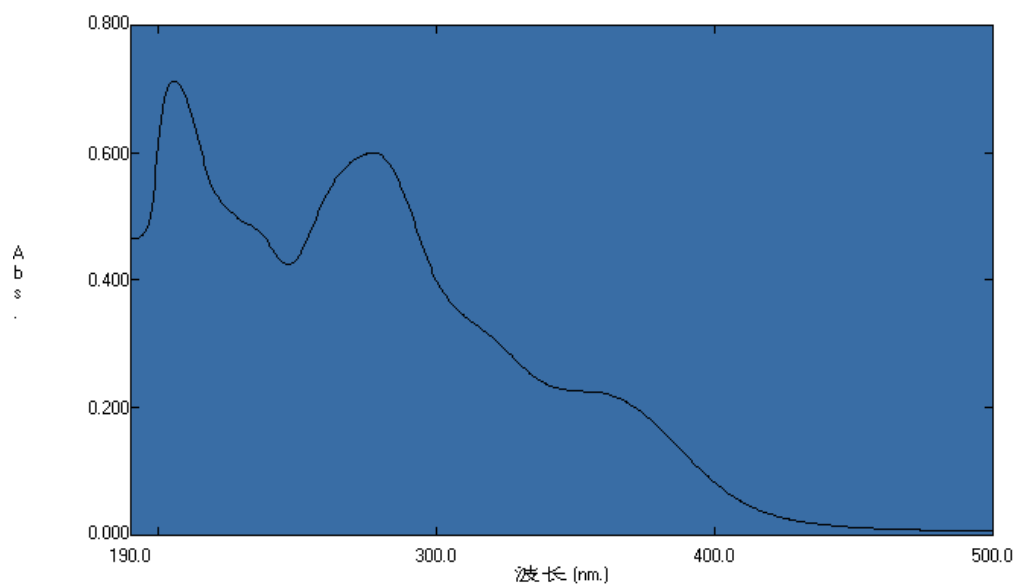

**Figure S27.** UV spectrum of compound **7**

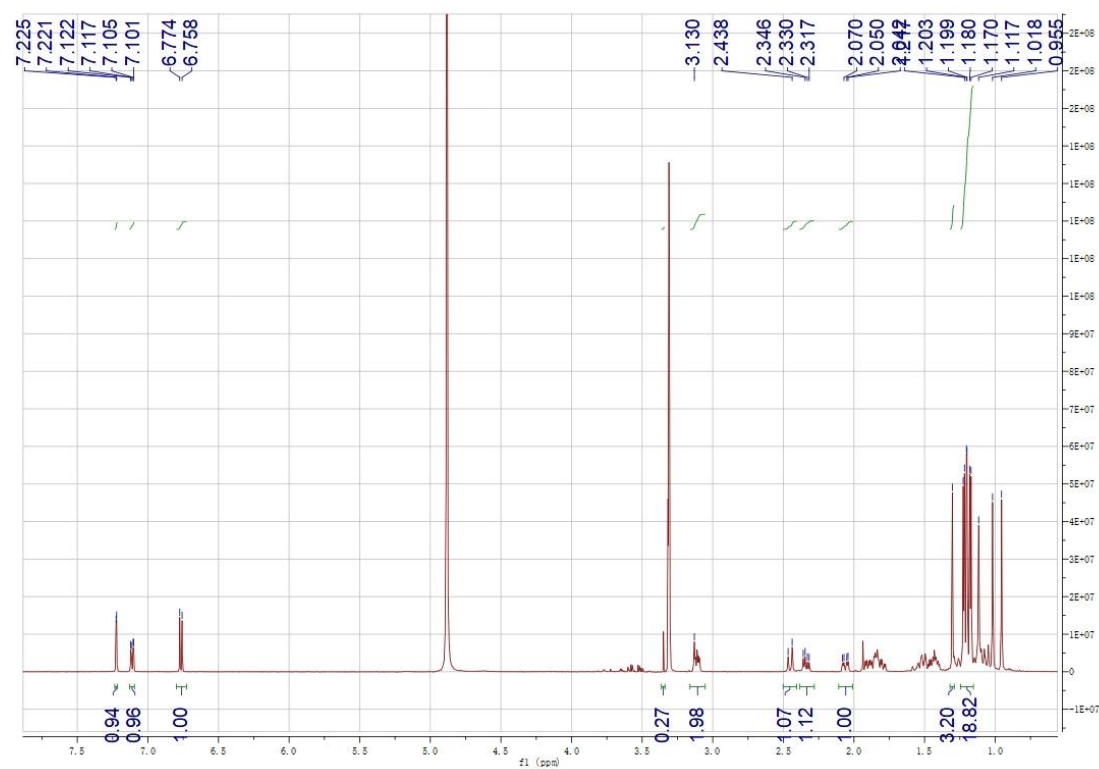

**Figure S28.** <sup>1</sup>H NMR spectrum of compound **8**

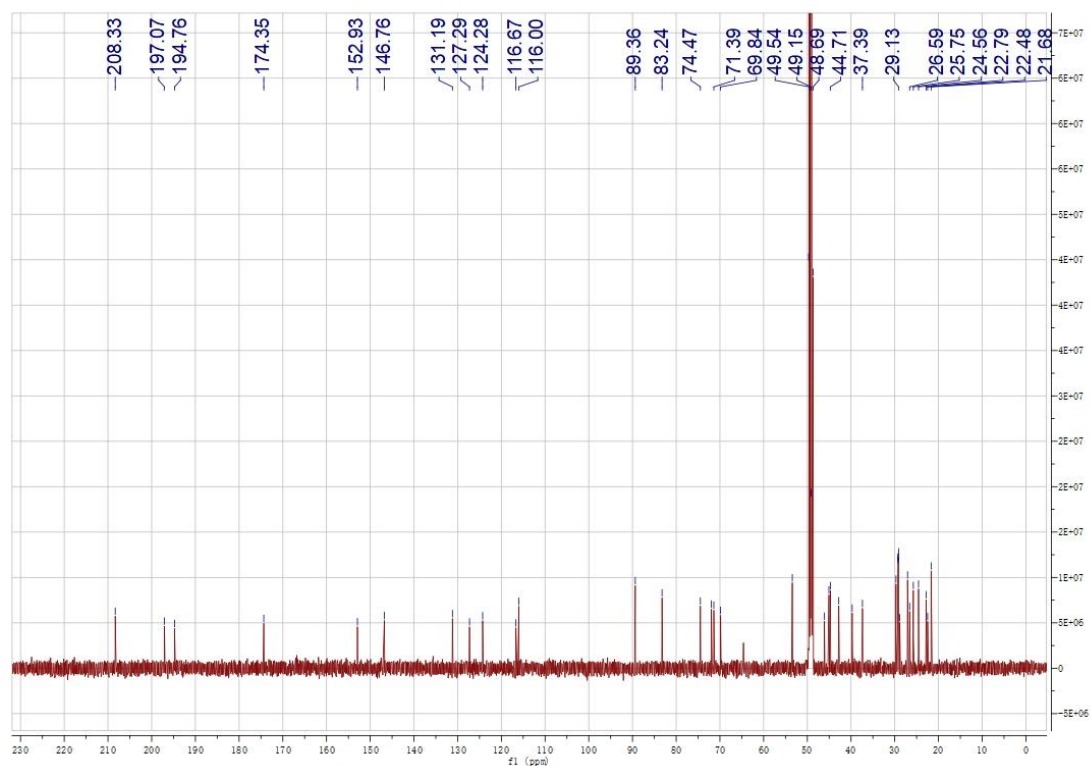

**Figure S29.**  $^{13}\text{C}$  NMR spectrum of compound **8**

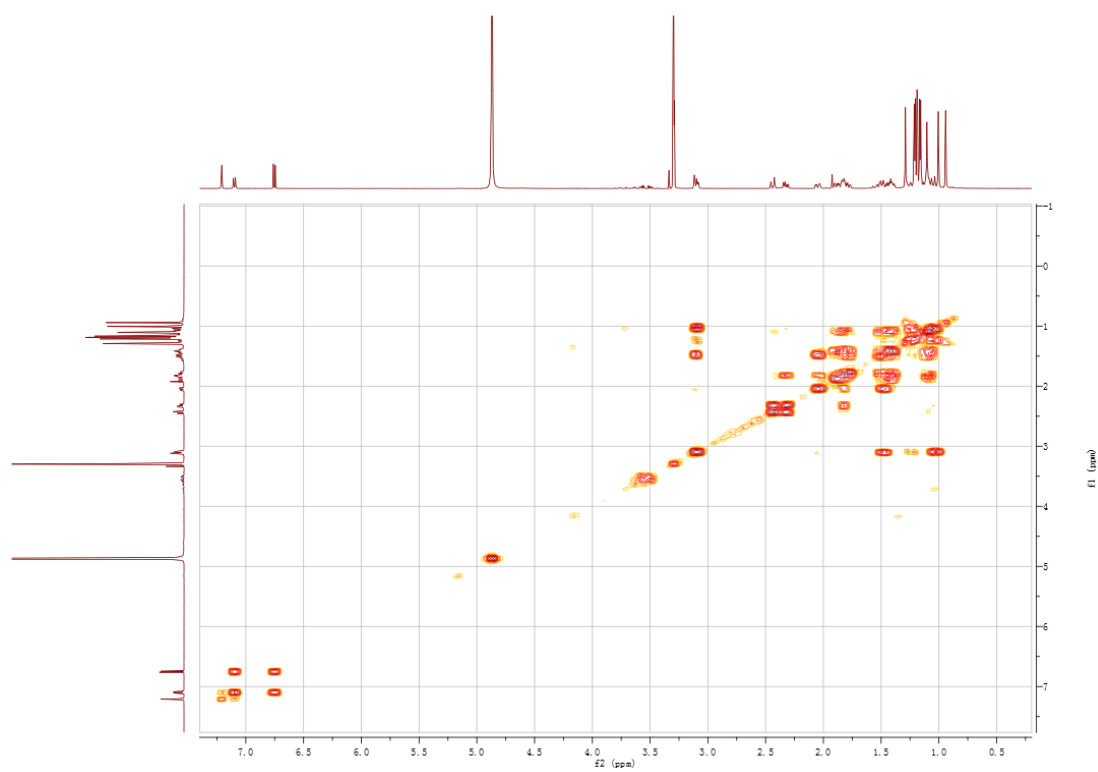

**Figure S30.**  $^1\text{H}$  -  $^1\text{H}$  COSY spectrum of compound **8**

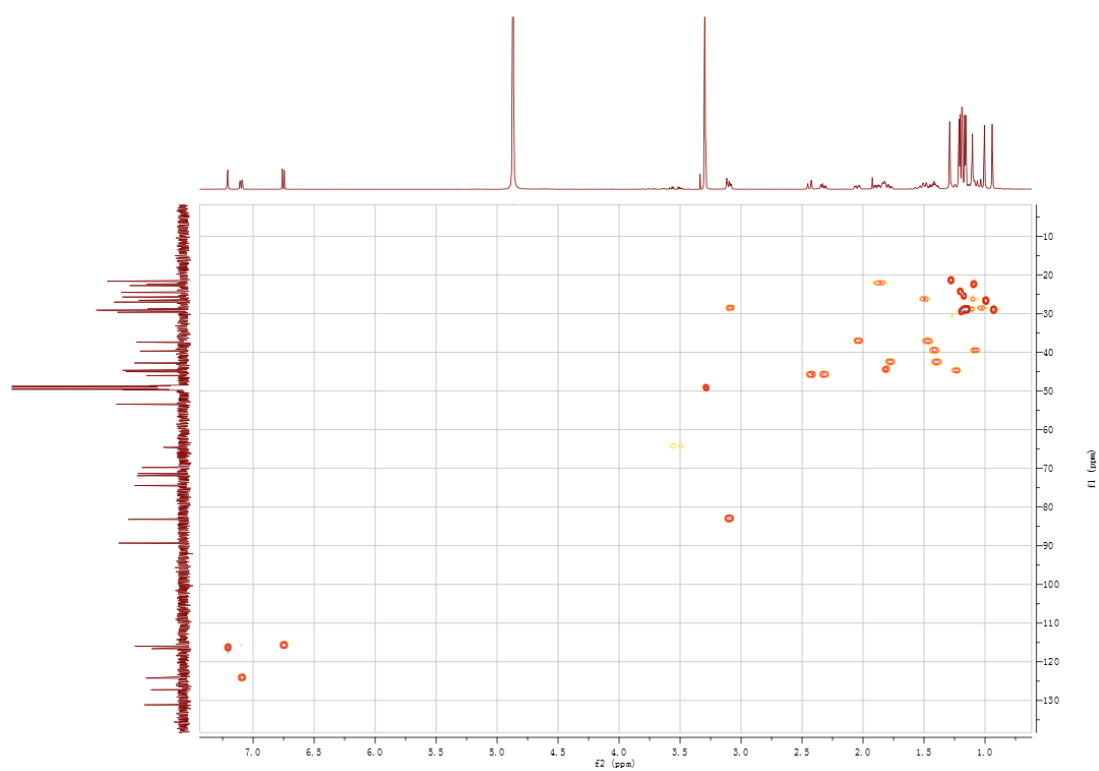

**Figure S31. HSQC spectrum of compound 8**

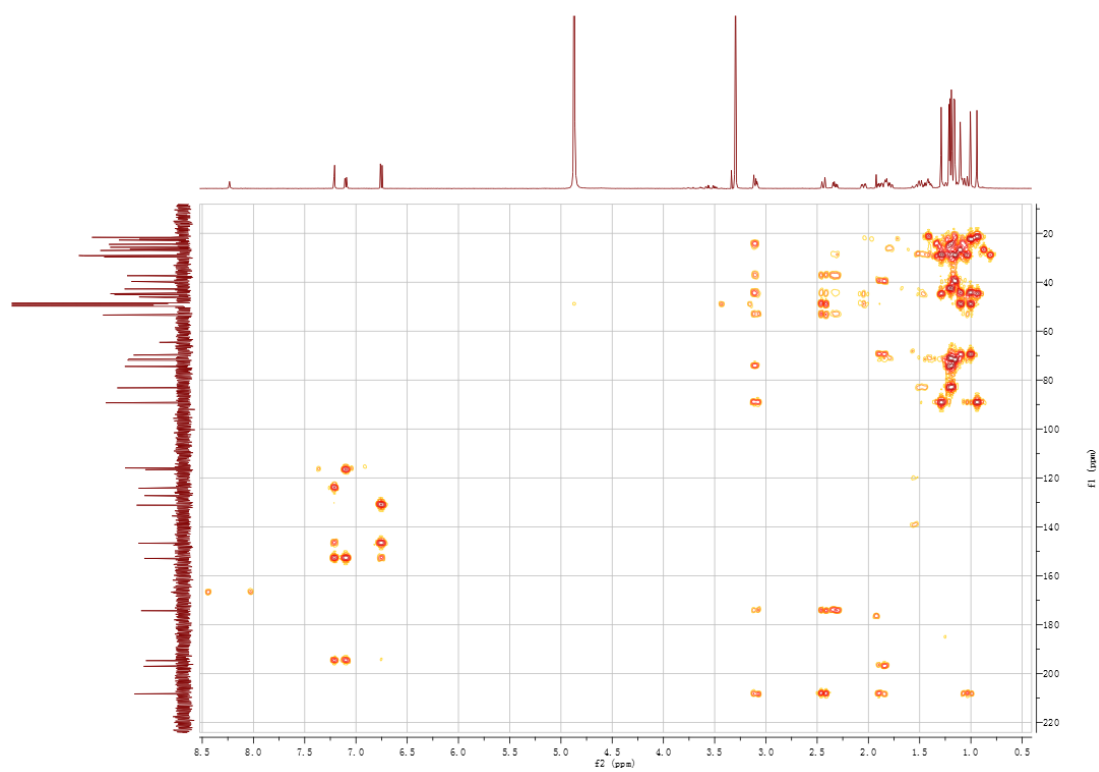

**Figure S32. HMBC spectrum of compound 8**

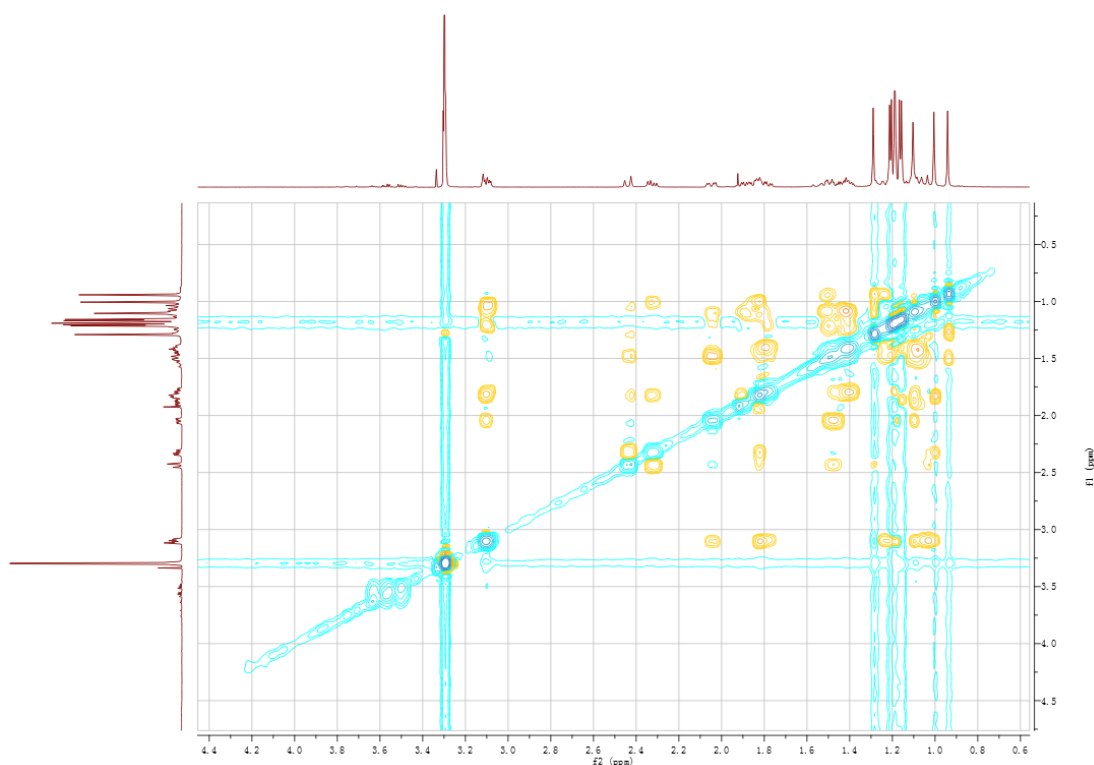

**Figure S33.** ROESY spectrum of compound **8**

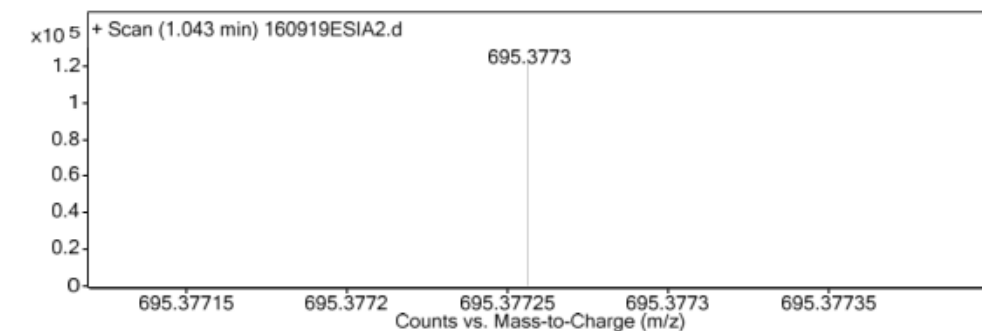

**Peak List**

| <i>m/z</i> | <i>z</i> | Abund     | Formula                                            | Ion |
|------------|----------|-----------|----------------------------------------------------|-----|
| 121.0509   | 1        | 34114.15  |                                                    |     |
| 673.395    | 1        | 75069.27  |                                                    |     |
| 674.398    | 1        | 24636.68  |                                                    |     |
| 695.3773   | 1        | 123813.91 | C <sub>38</sub> H <sub>56</sub> Na O <sub>10</sub> | M+  |
| 696.3801   | 1        | 43001.16  | C <sub>38</sub> H <sub>56</sub> Na O <sub>10</sub> | M+  |
| 922.0098   | 1        | 38828.61  |                                                    |     |
| 1362.8071  | 1        | 29009.37  |                                                    |     |
| 1367.7638  | 1        | 172719.64 |                                                    |     |
| 1368.7673  | 1        | 141331.05 |                                                    |     |
| 1369.7698  | 1        | 56734.86  |                                                    |     |

**Formula Calculator Element Limits**

| Element | Min | Max |
|---------|-----|-----|
| C       | 0   | 200 |
| H       | 0   | 400 |
| O       | 0   | 12  |
| Na      | 1   | 1   |

**Formula Calculator Results**

| Formula                                            | CalculatedMass | Mz       | Diff.(mDa) | Diff. (ppm) | DBE  |
|----------------------------------------------------|----------------|----------|------------|-------------|------|
| C <sub>38</sub> H <sub>56</sub> Na O <sub>10</sub> | 695.3771       | 695.3773 | -0.2       | 0.3         | 10.5 |

**Figure S34.** HR-ESI-MS spectrum of compound **8**

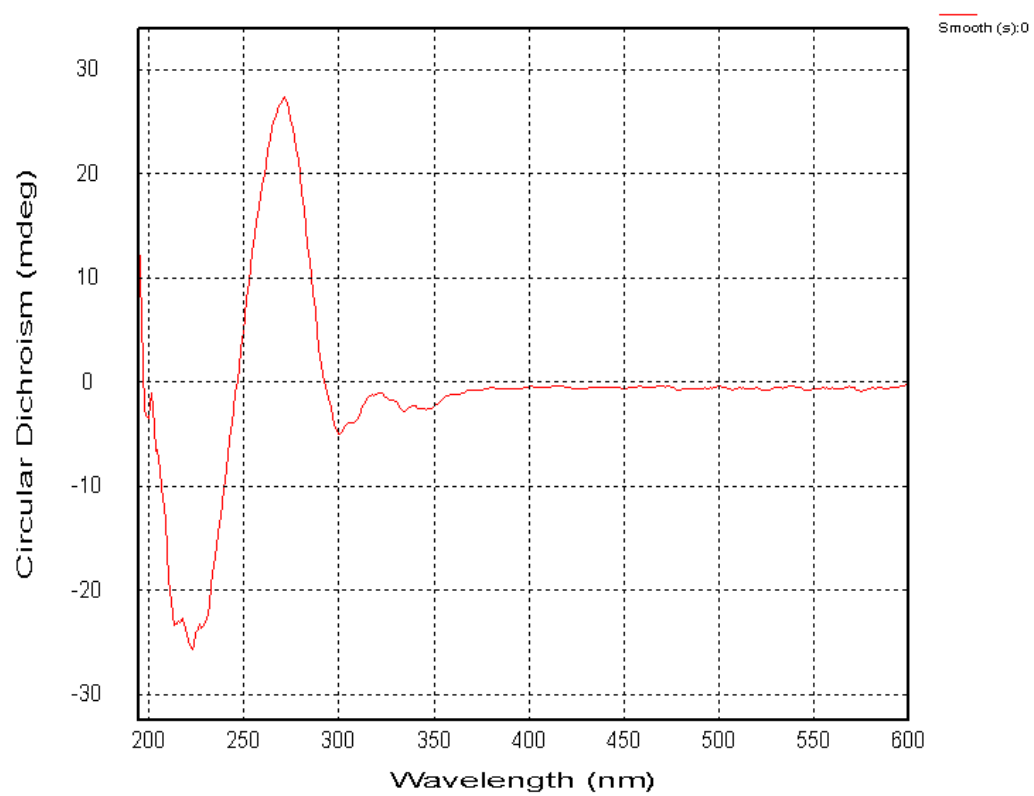

**Figure S35.** CD spectrum of compound **8**

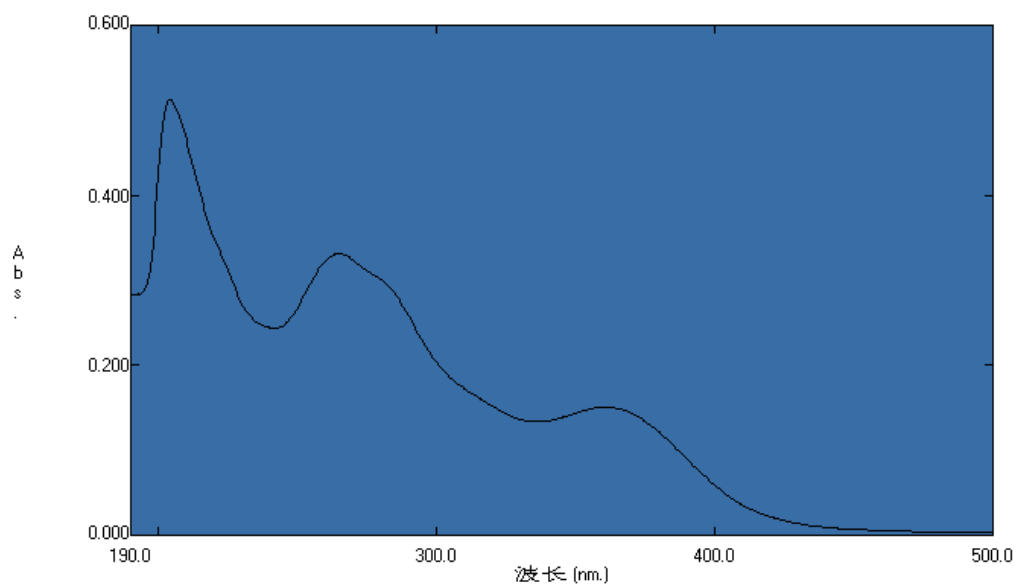

**Figure S36.** UV spectrum of compound **8**

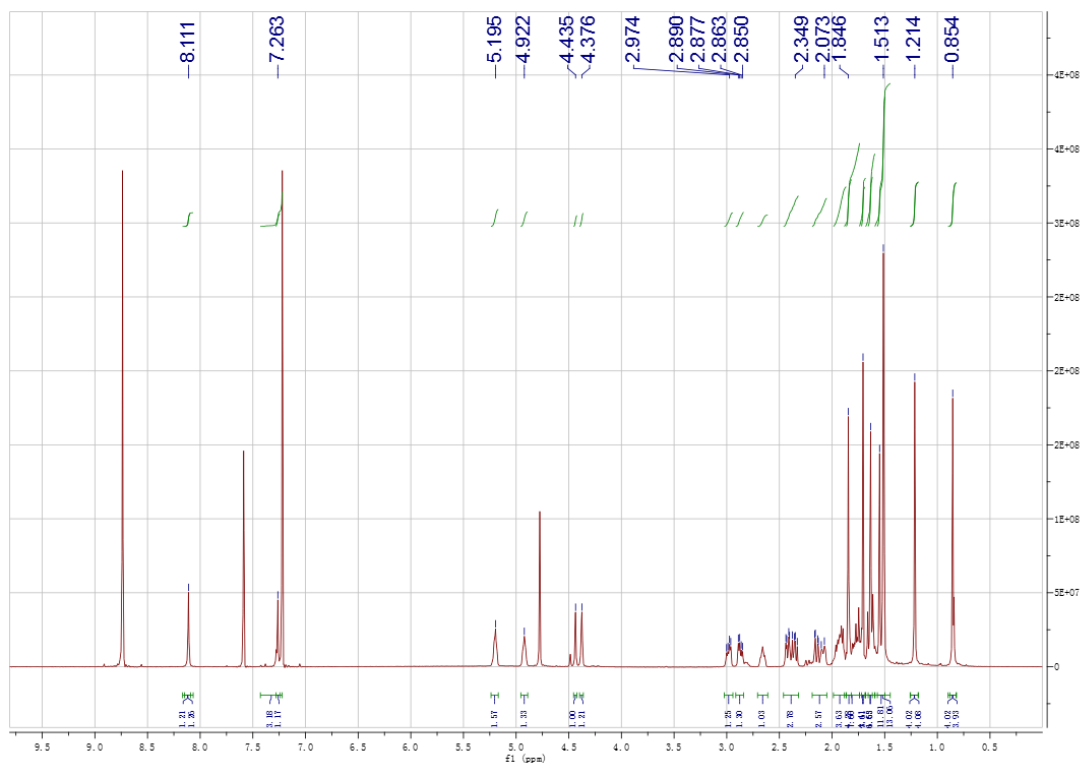

Figure S37. <sup>1</sup>H NMR spectrum of compound 11

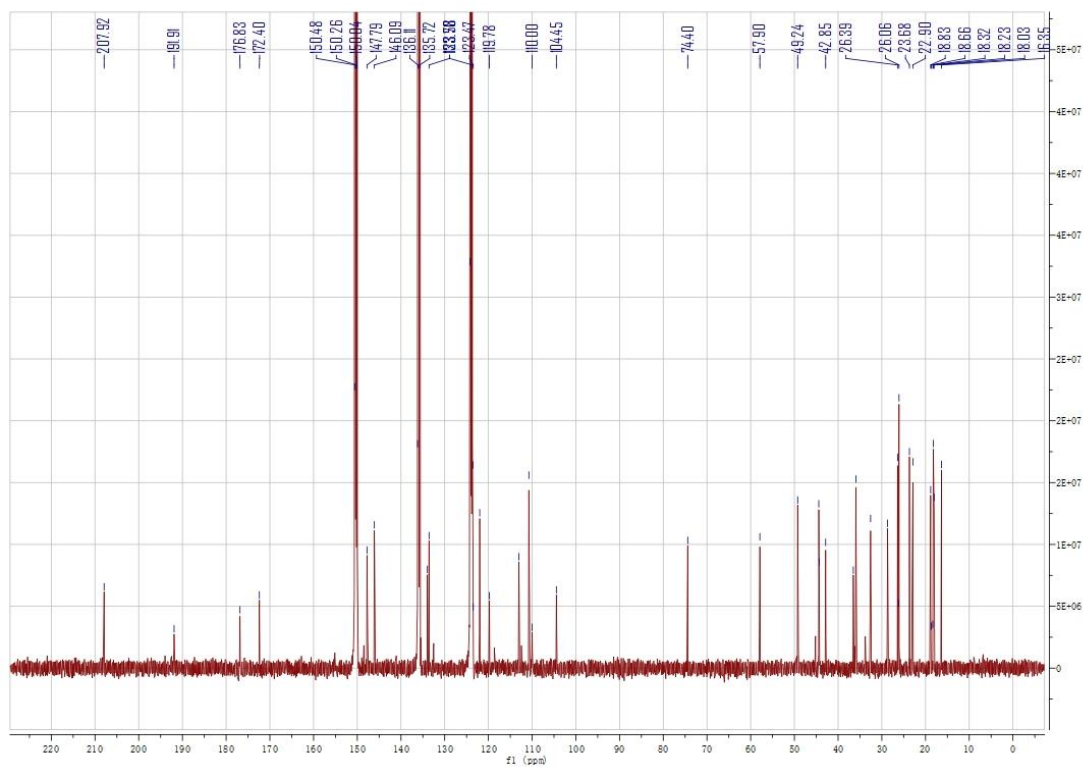

Figure S38. <sup>13</sup>C NMR spectrum of compound 11

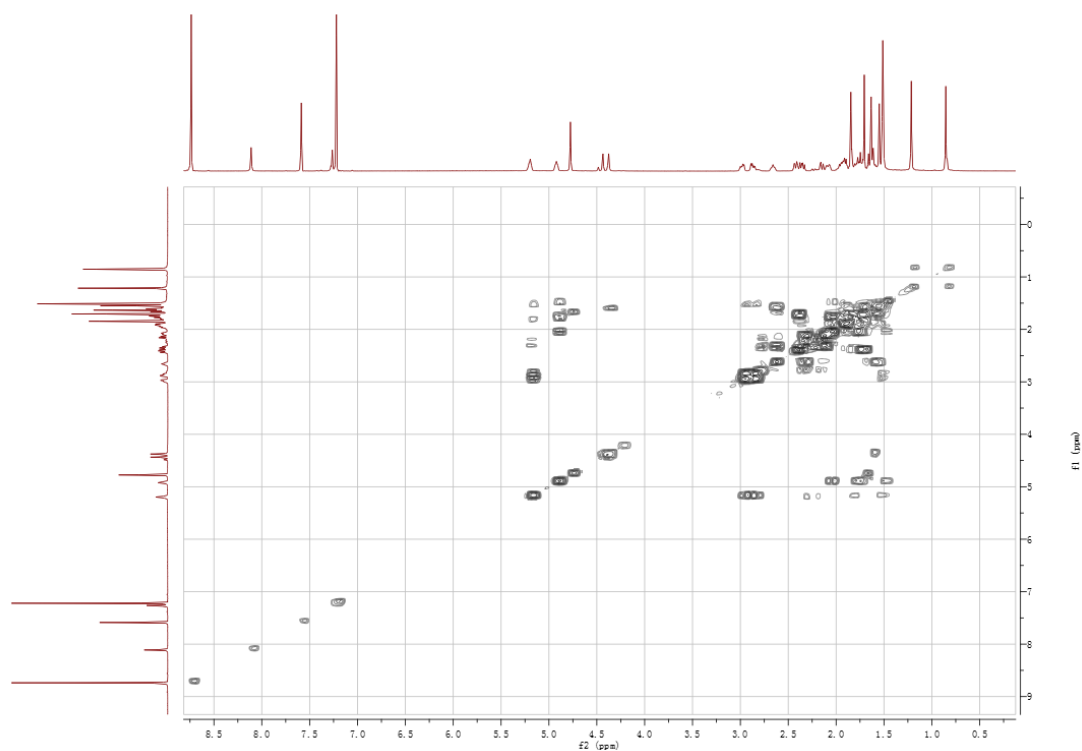

**Figure S39.**  $^1\text{H}$  -  $^1\text{H}$  COSY spectrum of compound **11**

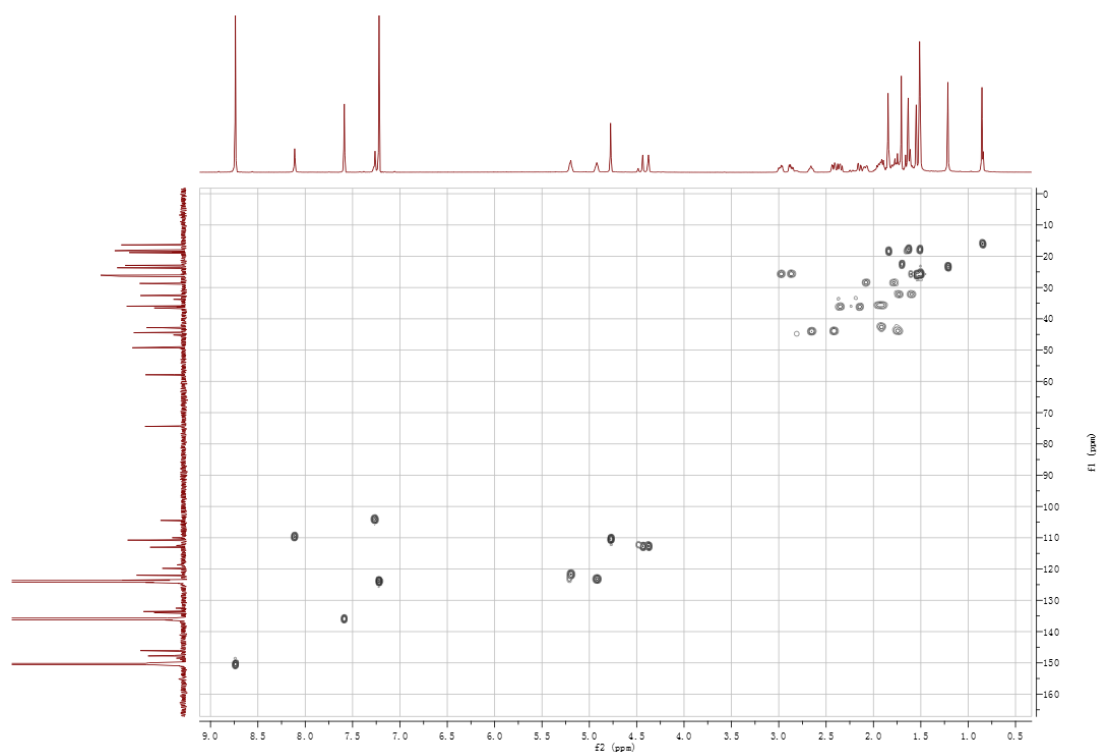

**Figure S40.** HSQC spectrum of compound **11**



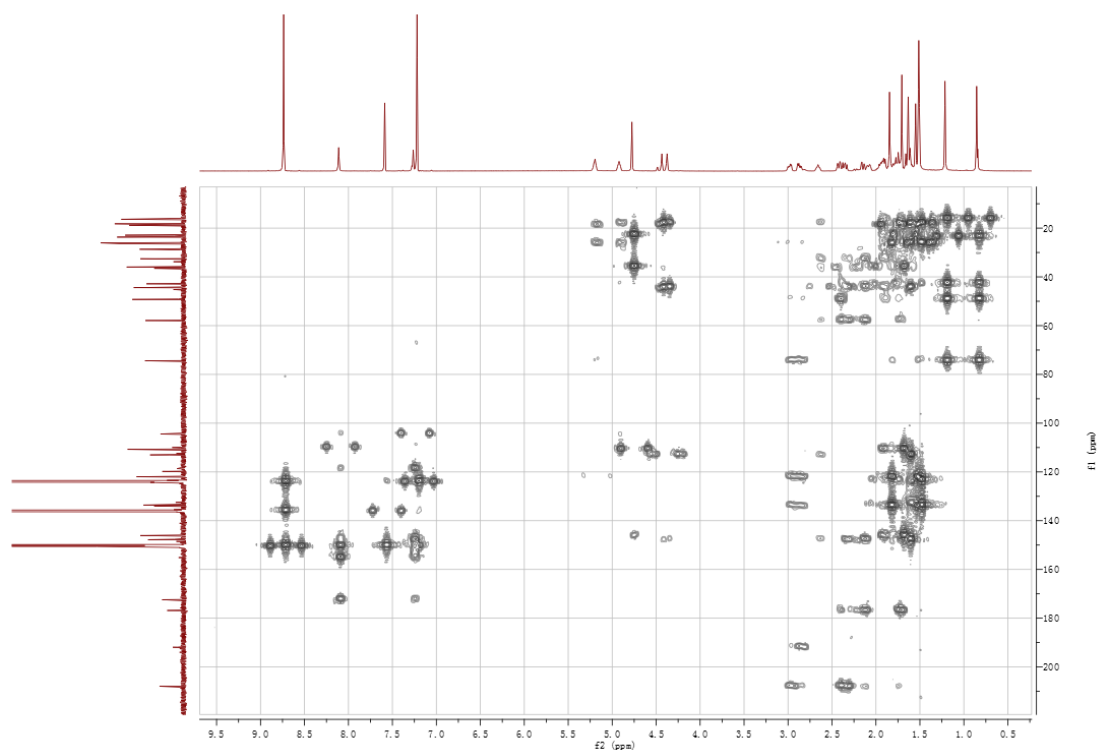

**Figure S41.** HMBC spectrum of compound **11**

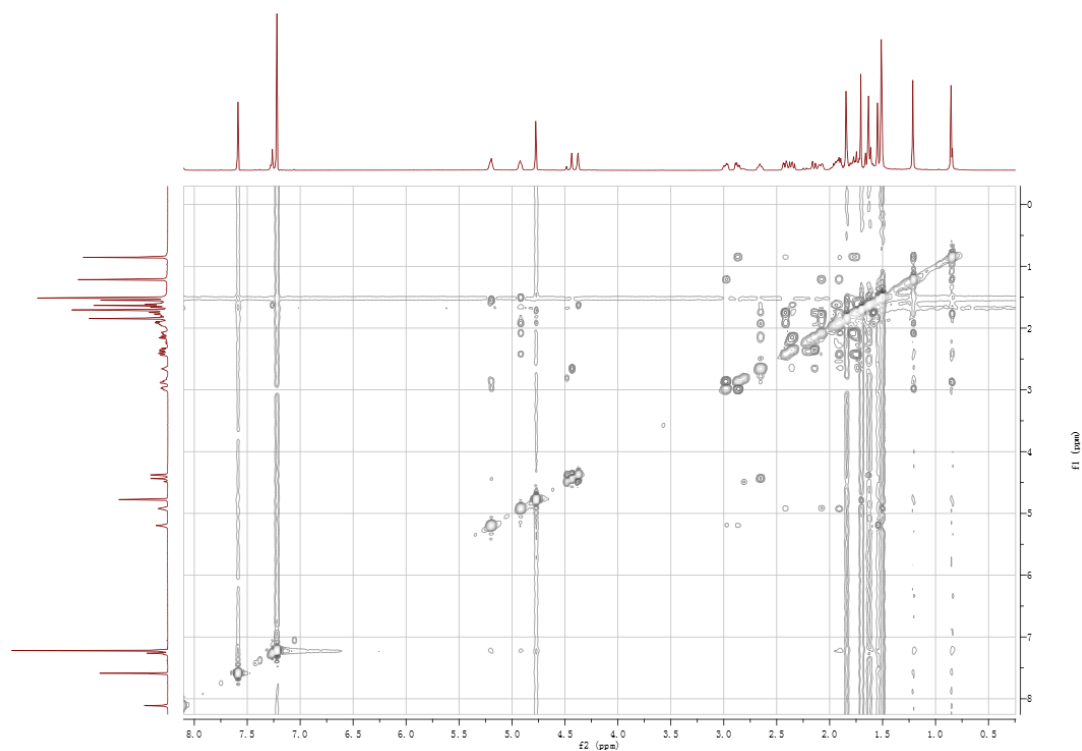

**Figure S42.** ROESY spectrum of compound **11**

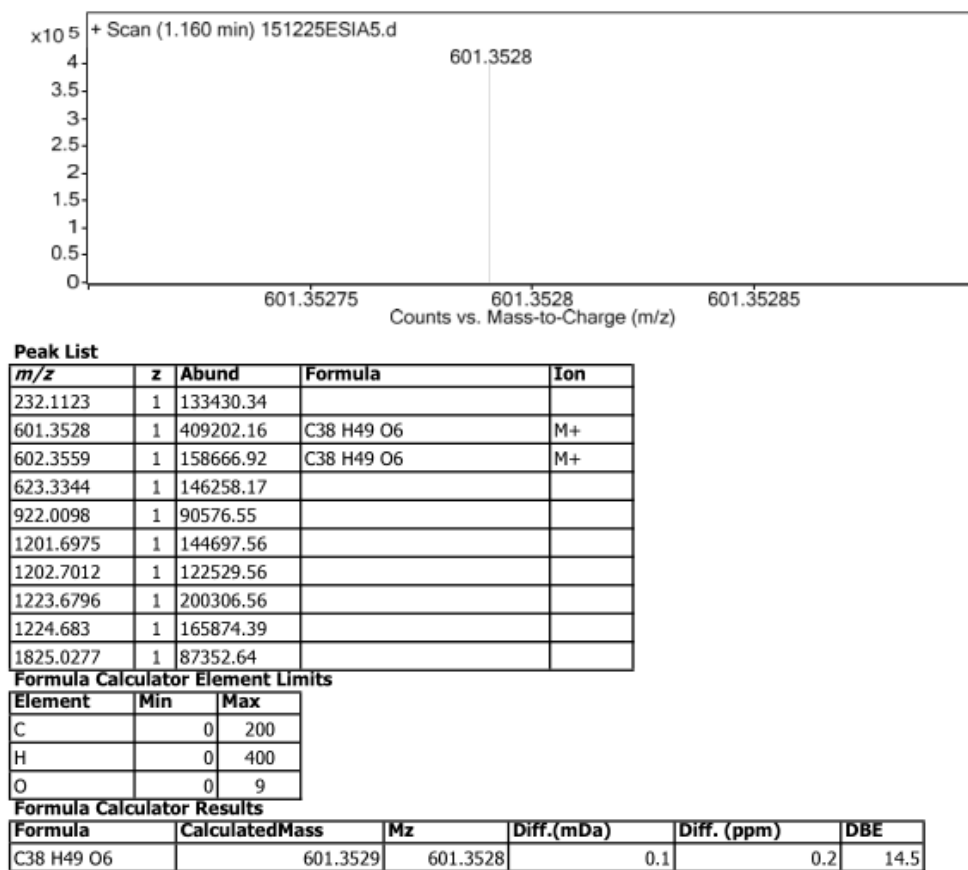

Figure S43. HR-ESI-MS spectrum of compound **11**

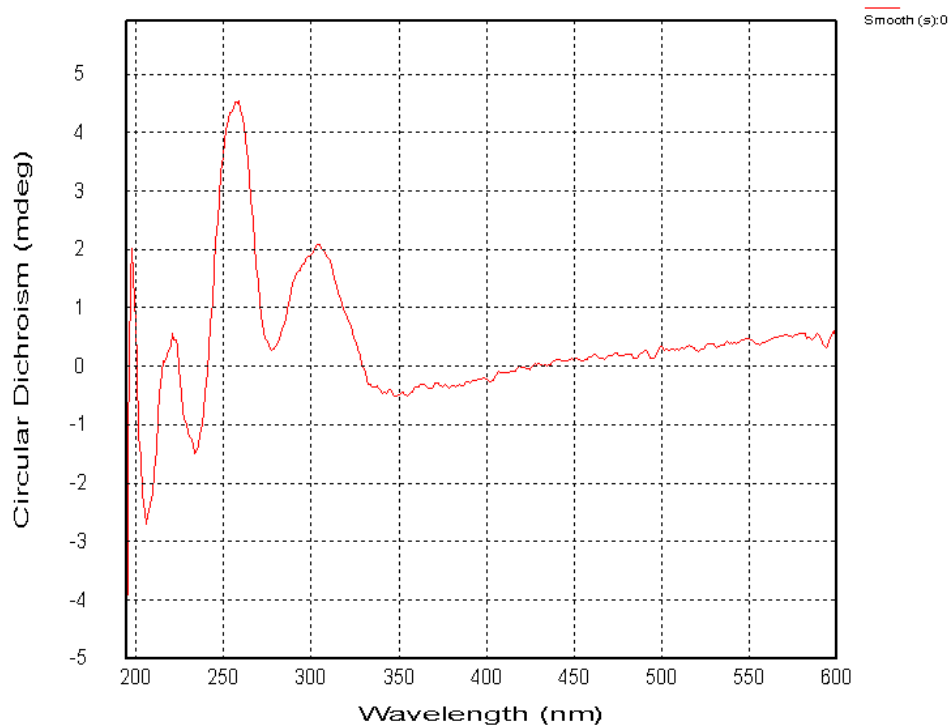

Figure S44. CD spectrum of compound **11**

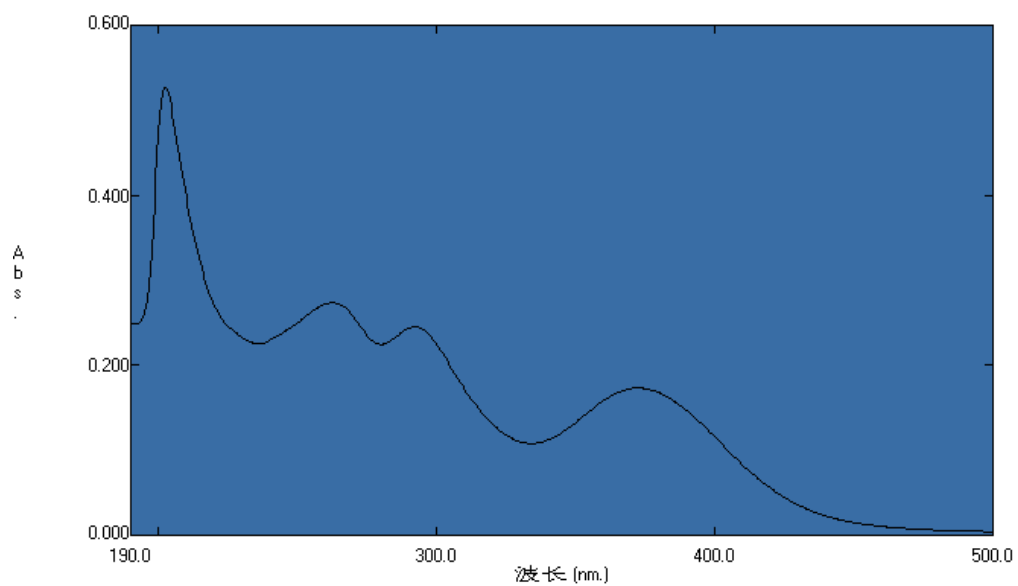

**Figure S45.** UV spectrum of compound **11**

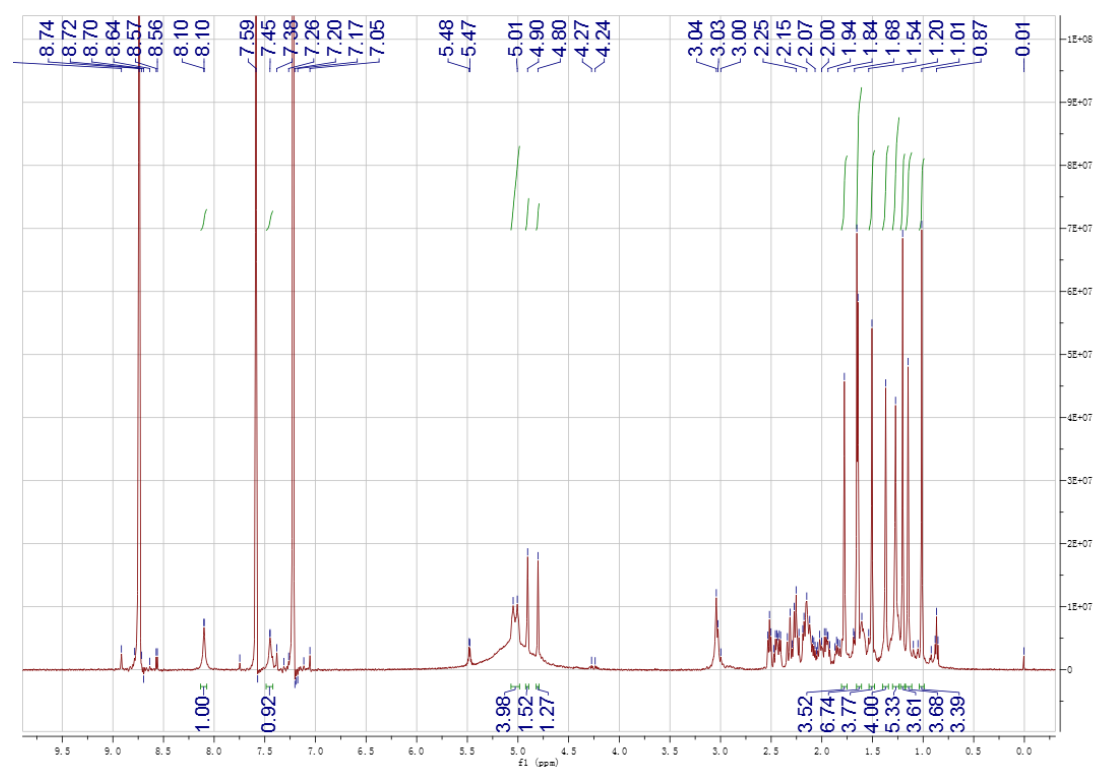

**Figure S46.**  $^1\text{H}$  NMR spectrum of compound **15**

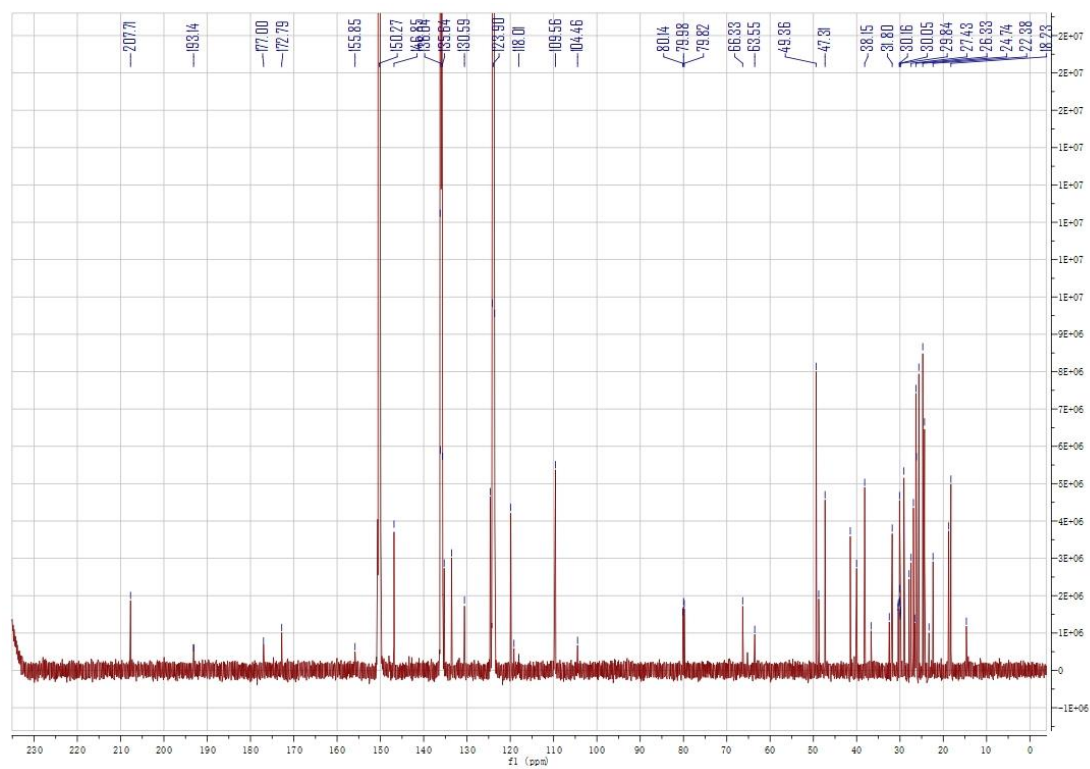

**Figure S47.**  $^{13}\text{C}$  NMR spectrum of compound **15**

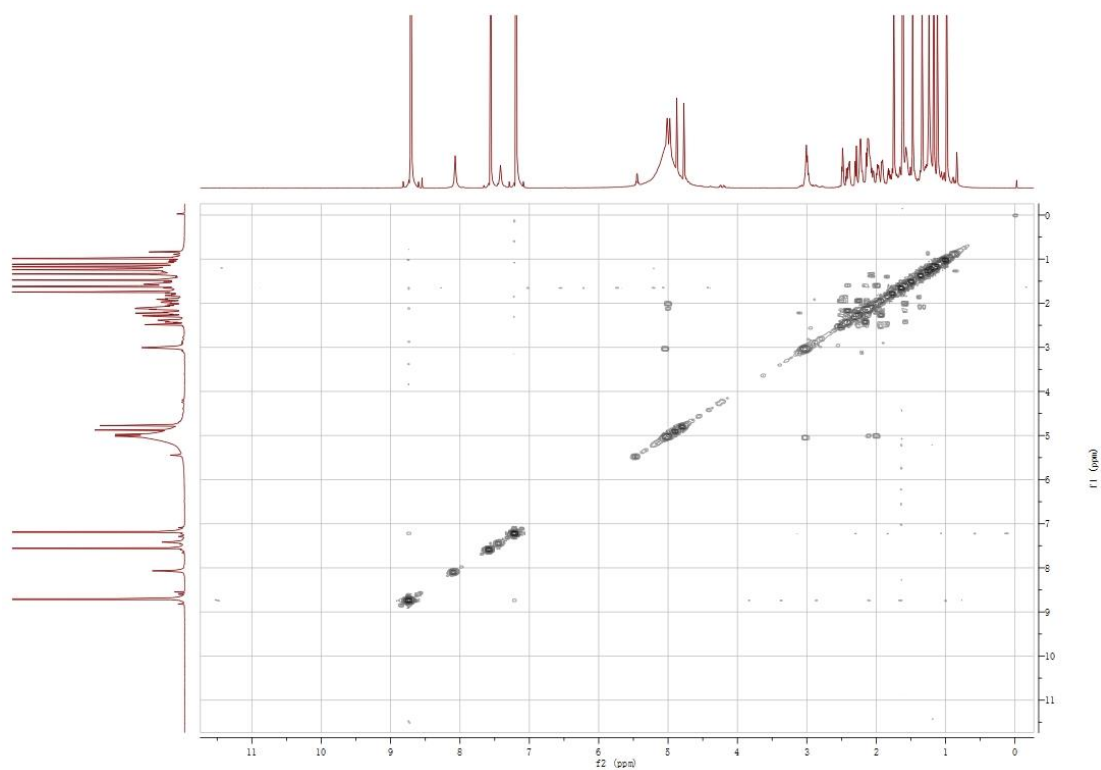

**Figure S48.**  $^1\text{H}$  -  $^1\text{H}$  COSY spectrum of compound **15**

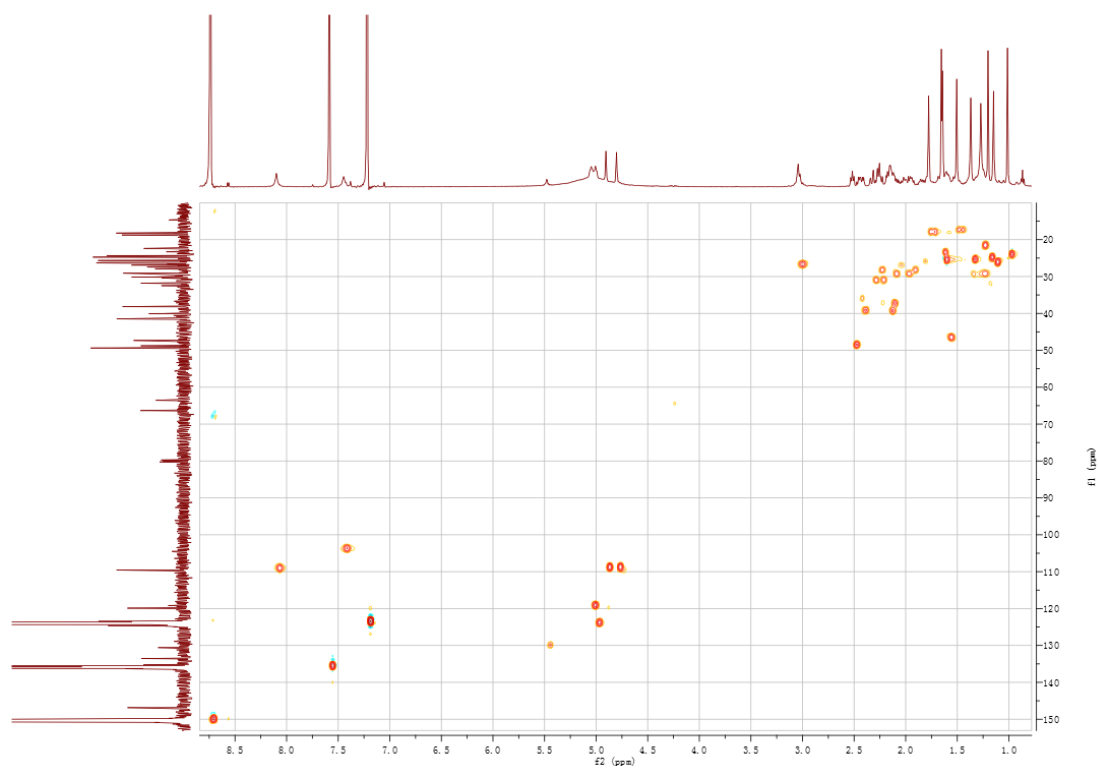

**Figure S49.** HSQC spectrum of compound **15**

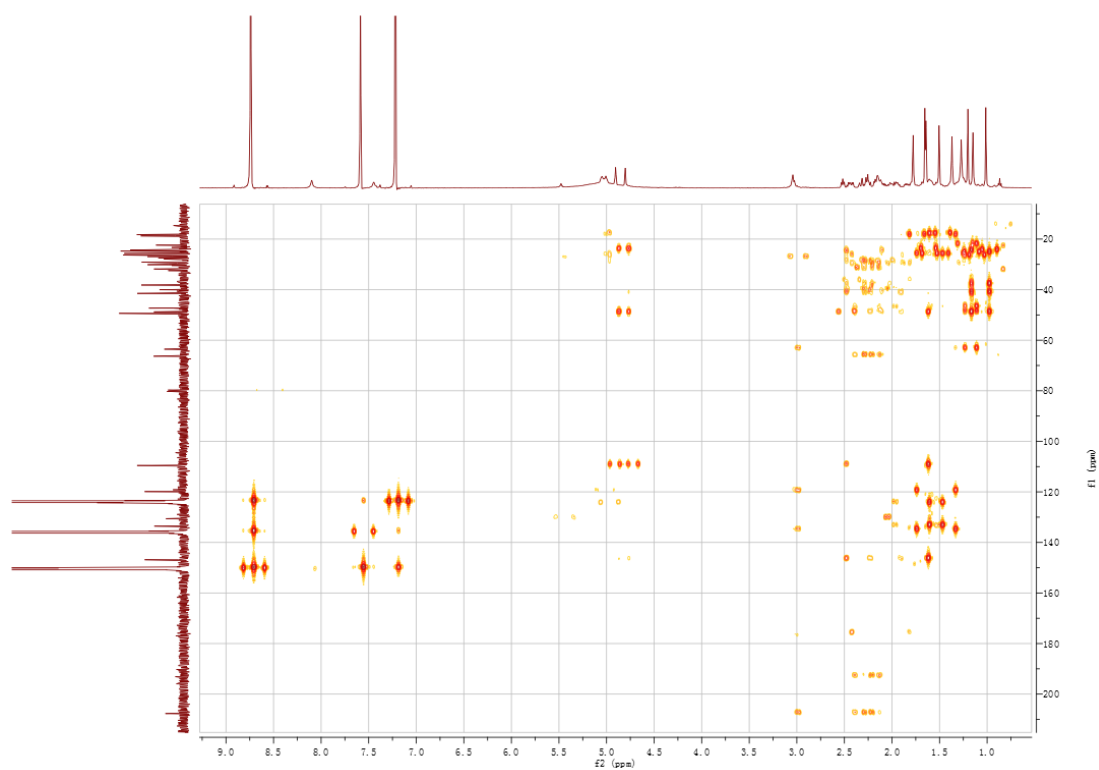

**Figure S50.** HMBC spectrum of compound **15**

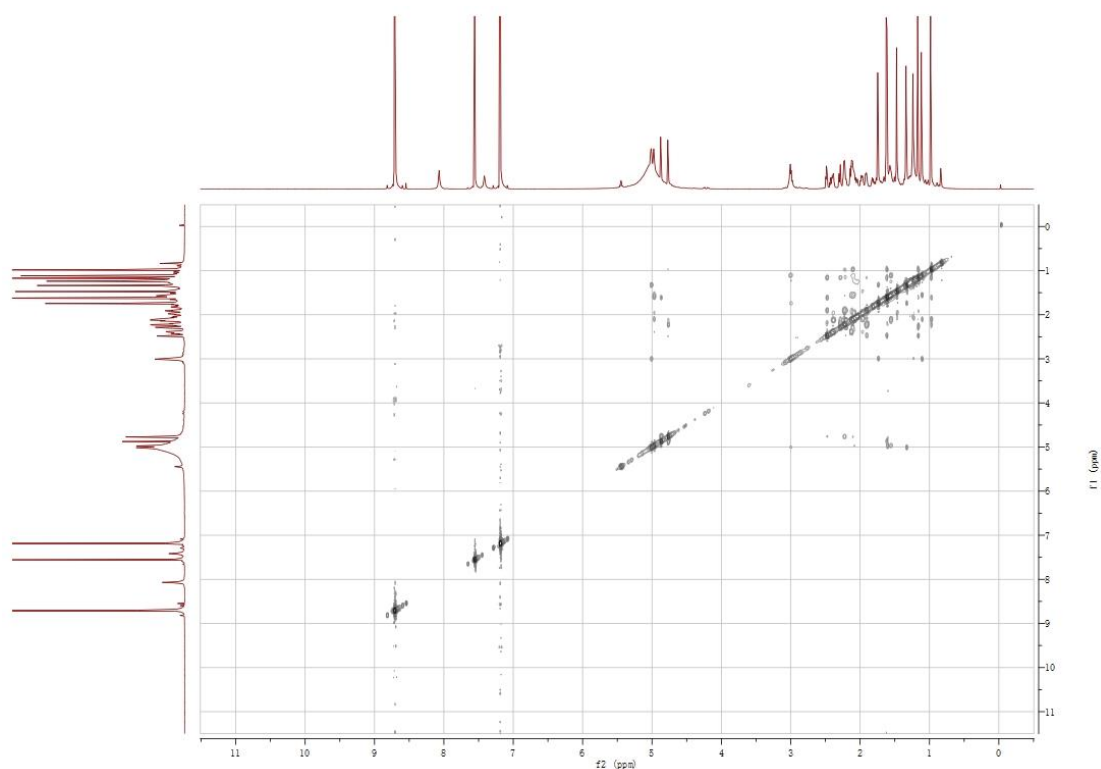

**Figure S51.** ROESY spectrum of compound **15**

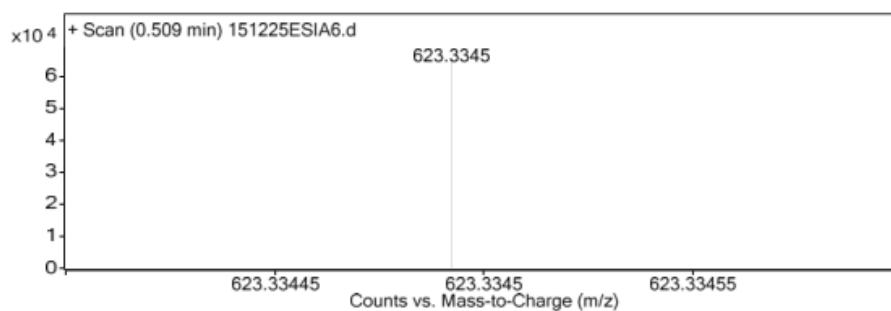

**Peak List**

| <i>m/z</i> | <i>z</i> | Abund     | Formula                                           | Ion |
|------------|----------|-----------|---------------------------------------------------|-----|
| 121.0509   |          | 48542.58  |                                                   |     |
| 232.1125   | 1        | 265155.63 |                                                   |     |
| 233.1153   | 1        | 42027.89  |                                                   |     |
| 601.352    | 1        | 28641.88  |                                                   |     |
| 623.3345   | 1        | 66076.87  | C <sub>38</sub> H <sub>48</sub> Na O <sub>6</sub> | M+  |
| 922.0098   | 1        | 59309.74  |                                                   |     |
| 1223.6797  | 1        | 85734.8   |                                                   |     |
| 1224.6832  | 1        | 69575.97  |                                                   |     |
| 1225.6855  | 1        | 26548.52  |                                                   |     |
| 1825.0274  | 1        | 26869.52  |                                                   |     |

**Formula Calculator Element Limits**

| Element | Min | Max |
|---------|-----|-----|
| C       | 0   | 200 |
| H       | 0   | 400 |
| O       | 0   | 9   |
| Na      | 1   | 1   |

**Formula Calculator Results**

| Formula                                           | CalculatedMass | Mz       | Diff.(mDa) | Diff. (ppm) | DBE  |
|---------------------------------------------------|----------------|----------|------------|-------------|------|
| C <sub>38</sub> H <sub>48</sub> Na O <sub>6</sub> | 623.3349       | 623.3345 | 0.4        | 0.6         | 14.5 |

**Figure S52.** HR-ESI-MS spectrum of compound **15**

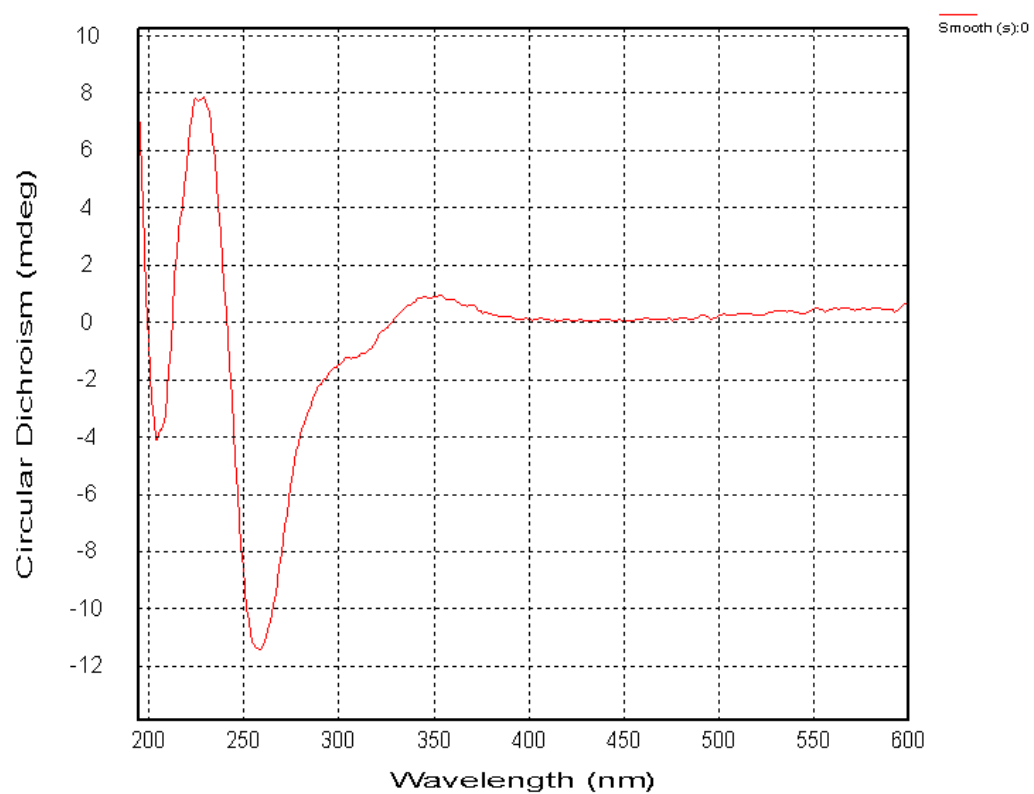

**Figure S53.** CD spectrum of compound **15**

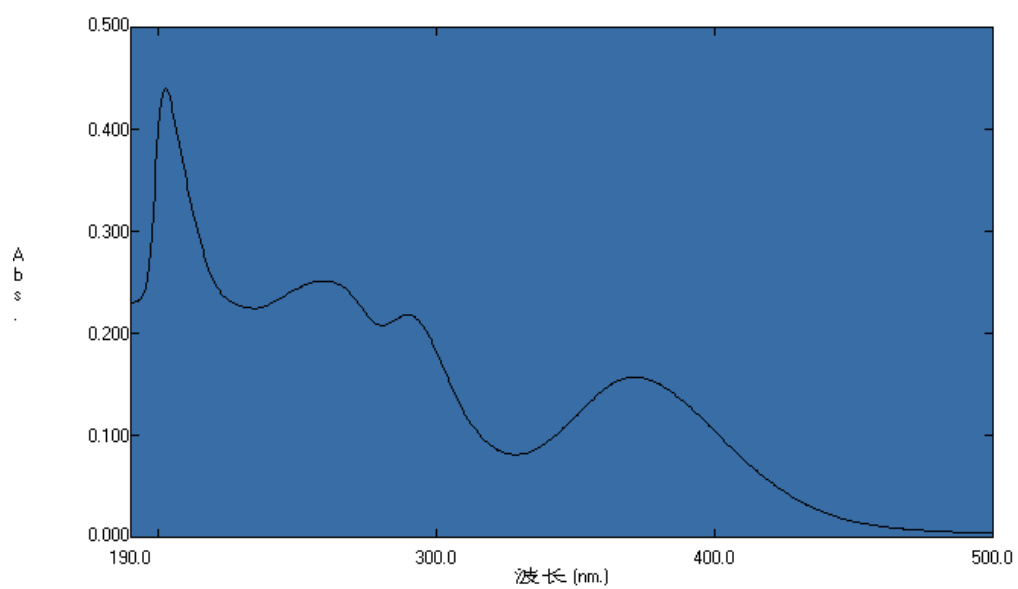

**Figure S54.** UV spectrum of compound **15**

## 1. Computational methods

### 1.1 Conformational analysis

Conformational analysis for compound **3-15** were performed in Yinfo Cloud Platform (<http://cloud.yinfotek.com/>) using Stochastic or Custom algorithm by Confab [1] at MMFF94 force field with RMSD threshold of 0.5 Å and energy window of 7 kcal/mol.

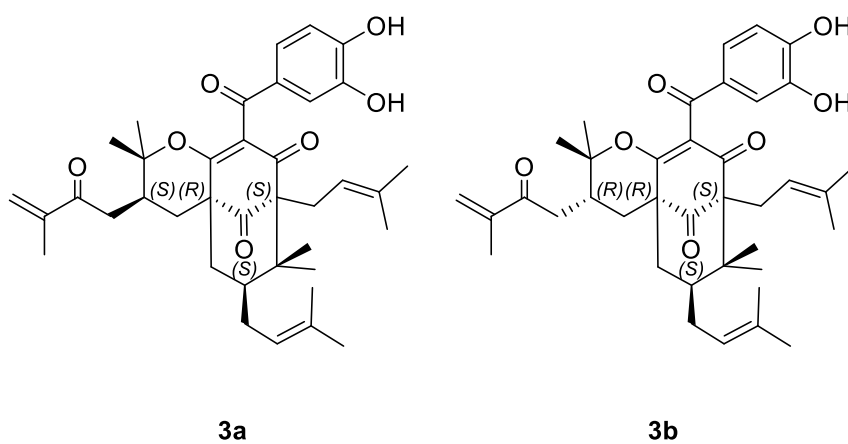

**Figure S55.** Chemical structure of compound **3**.



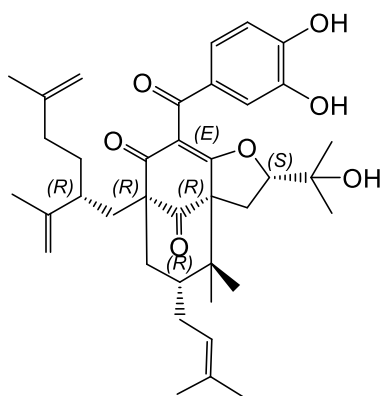

**5a**

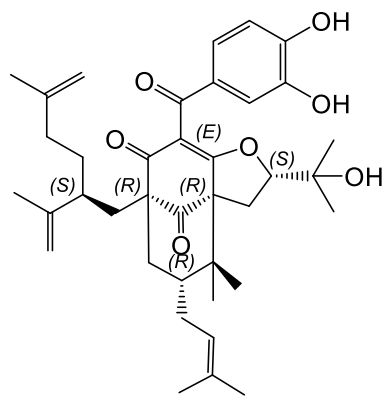

**5b**

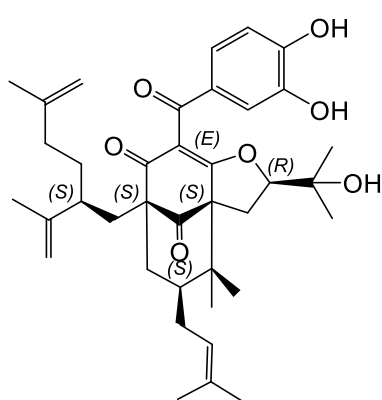

**5a'**

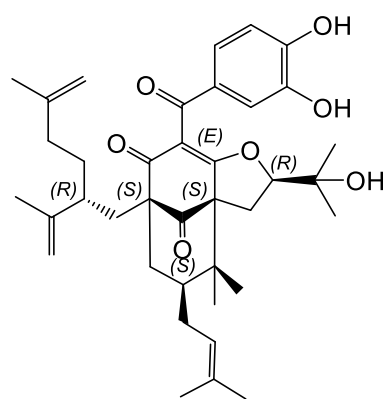

**5b'**

**Figure S56.** Chemical structure of compound **5**

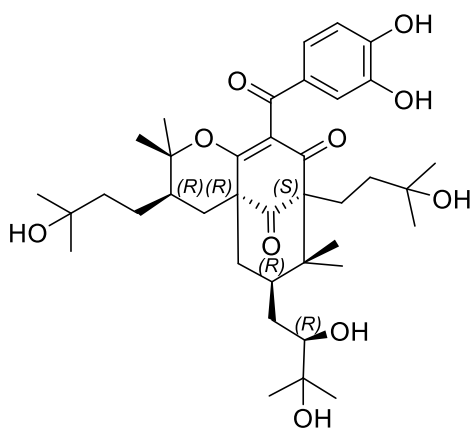

**7a**

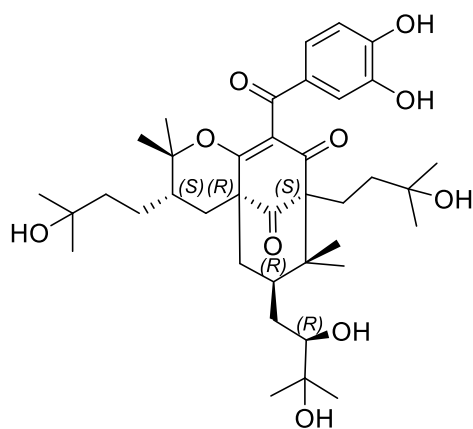

**7b**

**Figure S57.** Chemical structure of compound **7**

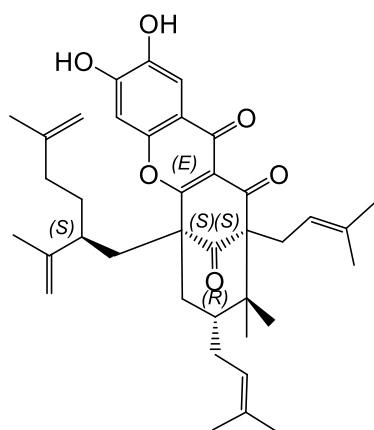

**11a**

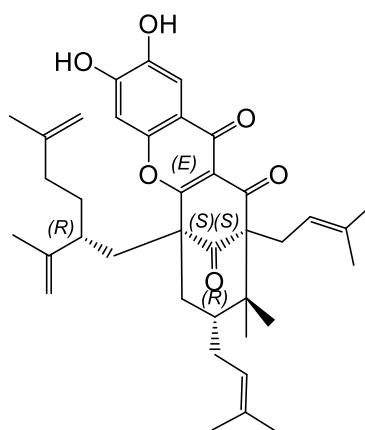

**11b**

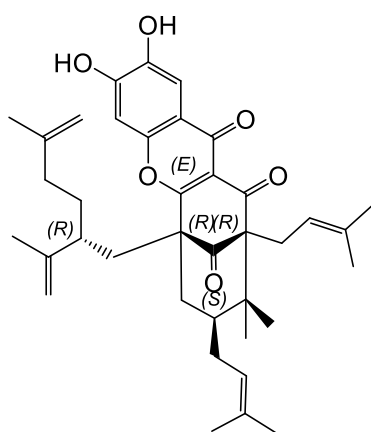

**11a'**

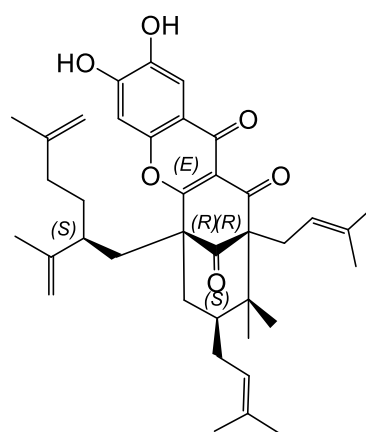

**11b'**

**Figure S58.** Chemical structure of compound **11**

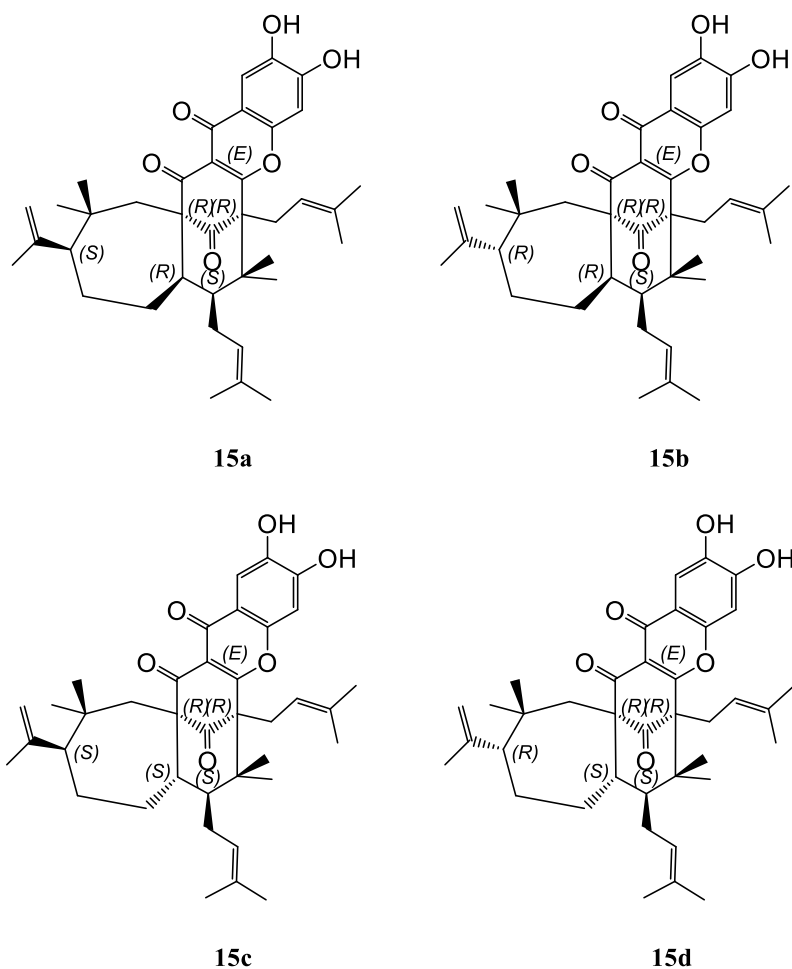

**Figure S59.** Chemical structure of compound **15**

## 1.2 NMR calculation

The theoretical calculations were carried out using Gaussian 09 [2]. At first, all conformers were optimized at PM6. Room-temperature equilibrium populations were calculated according to Boltzmann distribution law), based on which dominative conformers of population over 1% were kept. The chosen conformers were further optimized at B3LYP/6-31G(d,p) in gas phase. Vibrational frequency analysis confirmed the stable structures. NMR calculations were carried out following the protocol adapted from Michael *et al.* [3] using the Gauge-Including Atomic Orbitals (GIAO) method at mPW1PW91/6-311+G(2d,p) level in CDCl<sub>3</sub> simulated by the IEFPCM model. The TMS-corrected NMR chemical shift values were averaged according to Boltzmann distribution and fitted to the experimental values by linear

regression. The calculated  $^{13}\text{C}$ - and  $^1\text{H}$ -NMR chemical shift values of TMS in  $(\text{CH}_3)_2\text{CO}$  were 207.07, 30.92 and 2.17 ppm respectively. To confirm the conclusions of NMR calculations, DP4+ analysis was also performed.

$$\frac{N_i}{N} = \frac{g_i e^{-\frac{E_i}{k_B T}}}{\sum g_i e^{-\frac{E_i}{k_B T}}} \quad (1)$$

where  $N_i$  is the number of conformer  $i$  with energy  $E_i$  and degeneracy  $g_i$  at temperature  $T$ , and  $k_B$  is Boltzmann constant.

### 1.3 ECD calculation

The structures were directly derived from the previous NMR calculations. ECD calculations were conducted at B3LYP/6-311G(d,p) level in methanol with IEFPCM model using Time-dependent Density functional theory (TD-DFT). Rotatory strengths for 30 excited states were calculated. The ECD spectrum was simulated using the ECD/UV analysis tool in Yinfo Cloud Platform (<https://cloud.yinfotek.com/>) by overlapping Gaussian functions for each transition according to (2).

$$\Delta\epsilon(E) = \frac{1}{2.297 \times 10^{-39}} \times \frac{1}{\sqrt{2\pi}\sigma} \sum_i^A \Delta E_i R_i e^{-\left(\frac{E-E_i}{2\sigma}\right)^2} \quad (2)$$

where  $\sigma$  represents the width of the band at  $1/e$  height, while  $\Delta E_i$  and  $R_i$  are the excitation energies and rotatory strengths for transition  $i$ , respectively.

The spectrum of the enantiomers were produced directly by mirror inversion about the horizontal axis.

### 1.4 References

1. Noel M OBoyle, Tim V, ermeersch, Christopher J Flynn, Anita R Maguire Maguire, and Geoffrey R Hutchison. Confab - systematic generation of diverse low-energy conformers. *Journal of Cheminformatics*, 3:3–8, March 2011.

2. M. J. Frisch, G. W. Trucks, H. B. Schlegel, G. E. Scuseria, M. A. Robb, J. R. Cheeseman, G. Scalmani, V. Barone, B. Mennucci, G. A. Petersson, H. Nakatsuji, M. Caricato, X. Li, H. P. Hratchian, A. F. Izmaylov, J. Bloino, G. Zheng, J. L. Sonnenberg, M. Hada, M. Ehara, K. Toyota, R. Fukuda, J. Hasegawa, M. Ishida, T. Nakajima, Y. Honda, O. Kitao, H. Nakai, T. Vreven, J. A. Montgomery, Jr., J. E. Peralta, F. Ogliaro, M. Bearpark, J. J. Heyd, E. Brothers, K. N. Kudin, V. N. Staroverov, R. Kobayashi, J. Normand, K. Raghavachari, A. Rendell, J. C. Burant, S. S. Iyengar, J. Tomasi, M. Cossi, N. Rega, J. M. Millam, M. Klene, J. E. Knox, J. B. Cross, V. Bakken, C. Adamo, J. Jaramillo, R. Gomperts, R. E. Stratmann, O. Yazyev, A. J. Austin, R. Cammi, C. Pomelli, J. W. Ochterski, R. L. Martin, K. Morokuma, V. G. Zakrzewski, G. A. Voth, P. Salvador, J. J. Dannenberg, S. Dapprich, A. D. Daniels, O. Farkas, J. B. Foresman, J. V. Ortiz, J. Cioslowski, and D. J. Fox. Gaussian 09 Revision D.01. Gaussian Inc. Wallingford CT 2009.
3. Michael W. Lodewyk, Matthew R. Siebert, and Dean J. Tantillo. Computational Prediction of  $^1\text{H}$  and  $^{13}\text{C}$  Chemical Shifts: A Useful Tool for Natural Product, Mechanistic, and Synthetic Organic Chemistry. *Chem. Rev.*, 2012, *112* (3), pp 1839–1862.

## 2. Energies and Coordinates

### 2.1 Energies at B3LYP theory level

**Table S1.** Energies of configurations **3-15**

| Configuration | Conformer | Structure                                                                           | E (Hartree)    | E (kcal/mol) | Population (%) |
|---------------|-----------|-------------------------------------------------------------------------------------|----------------|--------------|----------------|
| 3a            | 1         | 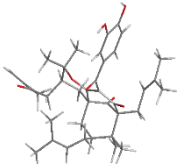   | -2003.44644560 | -1257181.62  | 92.1           |
| 3a            | 2         |    | -2003.44390520 | -1257180.02  | 6.2            |
| 3a            | 3         |  | -2003.44271410 | -1257179.27  | 1.7            |
| 3b            | 1         |  | -2003.45242160 | -1257185.37  | 91.3           |
| 3b            | 2         |  | -2003.44988080 | -1257183.77  | 6.1            |
| 3b            | 3         |  | -2003.44903000 | -1257183.24  | 2.5            |

---

|     |   |                                                                                     |                |             |       |
|-----|---|-------------------------------------------------------------------------------------|----------------|-------------|-------|
| 5a  | 1 |    | -1992.07050250 | -1250043.10 | 100.0 |
| 5b  | 1 |    | -2004.64733410 | -1257935.18 | 64.7  |
| 5b  | 2 |    | -2004.64675160 | -1257934.82 | 35.3  |
| 7a  | 1 |   | -2233.97168530 | -1401838.39 | 61.2  |
| 7a  | 2 |  | -2233.97126550 | -1401838.12 | 38.8  |
| 7b  | 2 |  | -2233.98081510 | -1401844.12 | 100.0 |
| 11a | 1 |  | -1928.21805330 | -1209975.09 | 76.1  |

---

---

|     |   |                                                                                     |                |             |      |
|-----|---|-------------------------------------------------------------------------------------|----------------|-------------|------|
| 11a | 2 | 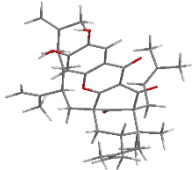   | -1928.21689230 | -1209974.36 | 22.2 |
| 11a | 3 |    | -1928.21443940 | -1209972.82 | 1.6  |
| 11b | 1 |    | -1928.22034100 | -1209976.52 | 78.0 |
| 11b | 2 |   | -1928.21914390 | -1209975.77 | 22.0 |
| 15a | 1 |  | -1928.32490450 | -1210042.14 | 99.0 |
| 15a | 9 |  | -1928.32052220 | -1210039.39 | 1.0  |
| 15b | 2 |  | -1928.32976750 | -1210045.19 | 66.6 |

---



|     |   |                                                                                    |                |             |       |
|-----|---|------------------------------------------------------------------------------------|----------------|-------------|-------|
| 15b | 1 | 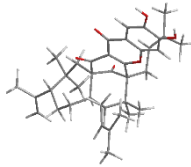  | -1928.32911680 | -1210044.78 | 33.4  |
| 15c | 1 |   | -1928.32229170 | -1210040.50 | 93.2  |
| 15c | 2 |   | -1928.31982180 | -1210038.95 | 6.8   |
| 15d | 1 |  | -1928.32117400 | -1210039.80 | 100.0 |

## 2.2 Coordinates at B3LYP theory level

**Table S2.** Standard orientations of configurations **3-15**

Conformer 3a-1

| Center | Atomic | Atomic | Coordinates (Angstroms) |           |           |
|--------|--------|--------|-------------------------|-----------|-----------|
| Number | Number | Type   | X                       | Y         | Z         |
| 1      | 6      | 0      | 1.115804                | 0.920099  | -0.867602 |
| 2      | 6      | 0      | -0.848091               | 2.557904  | -0.559302 |
| 3      | 6      | 0      | -1.479694               | 1.516106  | 0.394998  |
| 4      | 6      | 0      | -0.885698               | 0.179004  | 0.485598  |
| 5      | 6      | 0      | 0.316602                | -0.103199 | -0.076802 |

|    |   |   |           |           |           |
|----|---|---|-----------|-----------|-----------|
| 6  | 6 | 0 | -3.292306 | -2.562189 | 1.741198  |
| 7  | 1 | 0 | -2.928406 | -2.626590 | 2.763498  |
| 8  | 6 | 0 | -2.685203 | -1.636090 | 0.870798  |
| 9  | 6 | 0 | -1.573701 | -0.812794 | 1.402398  |
| 10 | 6 | 0 | -4.324508 | -3.361986 | 1.292398  |
| 11 | 6 | 0 | -4.779408 | -3.262184 | -0.040102 |
| 12 | 6 | 0 | -4.183005 | -2.345586 | -0.903902 |
| 13 | 1 | 0 | -4.547705 | -2.279785 | -1.923902 |
| 14 | 6 | 0 | -3.142303 | -1.535689 | -0.450202 |
| 15 | 1 | 0 | -2.695601 | -0.812990 | -1.124502 |
| 16 | 8 | 0 | -1.198101 | -0.915895 | 2.563798  |
| 17 | 8 | 0 | -4.987111 | -4.299784 | 2.052498  |
| 18 | 1 | 0 | -4.642911 | -4.285985 | 2.958398  |
| 19 | 8 | 0 | -5.791110 | -4.054181 | -0.475502 |
| 20 | 1 | 0 | -6.072712 | -4.608881 | 0.273398  |
| 21 | 8 | 0 | -2.477593 | 1.802709  | 1.048298  |
| 22 | 8 | 0 | 0.862898  | -1.314501 | 0.164498  |
| 23 | 6 | 0 | 0.098807  | 1.862702  | -1.531002 |
| 24 | 8 | 0 | 0.109208  | 2.075301  | -2.728802 |
| 25 | 6 | 0 | -2.003589 | 3.272208  | -1.322702 |
| 26 | 1 | 0 | -1.556087 | 4.014206  | -1.991602 |
| 27 | 1 | 0 | -2.611087 | 3.807309  | -0.593302 |
| 28 | 6 | 0 | -5.025791 | 2.536916  | -0.847602 |
| 29 | 1 | 0 | -5.530693 | 1.685518  | -0.372502 |

|    |   |   |           |           |           |
|----|---|---|-----------|-----------|-----------|
| 30 | 1 | 0 | -5.817589 | 3.205419  | -1.215402 |
| 31 | 1 | 0 | -4.461489 | 3.051215  | -0.069302 |
| 32 | 6 | 0 | -4.163092 | 2.057214  | -1.988802 |
| 33 | 6 | 0 | -2.865891 | 2.361010  | -2.164602 |
| 34 | 1 | 0 | -2.366693 | 1.952209  | -3.041202 |
| 35 | 6 | 0 | -4.883395 | 1.183416  | -2.990102 |
| 36 | 1 | 0 | -5.742993 | 1.711618  | -3.426902 |
| 37 | 1 | 0 | -5.287997 | 0.282417  | -2.507902 |
| 38 | 1 | 0 | -4.227896 | 0.871214  | -3.809702 |
| 39 | 6 | 0 | 1.987807  | 1.822796  | 0.081098  |
| 40 | 1 | 0 | 2.652609  | 2.385894  | -0.585302 |
| 41 | 1 | 0 | 2.631205  | 1.188694  | 0.696198  |
| 42 | 6 | 0 | 0.075612  | 3.576502  | 0.279698  |
| 43 | 6 | 0 | 1.246410  | 2.816098  | 1.012398  |
| 44 | 1 | 0 | 1.983412  | 3.608196  | 1.209998  |
| 45 | 6 | 0 | 0.969208  | 2.217799  | 2.427598  |
| 46 | 1 | 0 | 0.379810  | 2.945501  | 2.998398  |
| 47 | 6 | 0 | 2.265708  | 1.992895  | 3.167798  |
| 48 | 1 | 0 | 2.896410  | 2.883893  | 3.232598  |
| 49 | 1 | 0 | 0.372706  | 1.306601  | 2.391398  |
| 50 | 6 | 0 | 1.584296  | -2.027403 | -0.900802 |
| 51 | 6 | 0 | 2.660099  | -1.084606 | -1.499602 |
| 52 | 1 | 0 | 3.026897  | -1.577007 | -2.410102 |
| 53 | 6 | 0 | 1.984702  | 0.231296  | -1.947302 |

|    |   |   |           |           |           |
|----|---|---|-----------|-----------|-----------|
| 54 | 1 | 0 | 1.351702  | 0.039998  | -2.817402 |
| 55 | 1 | 0 | 2.744005  | 0.939594  | -2.296002 |
| 56 | 6 | 0 | 0.549395  | -2.459200 | -1.952502 |
| 57 | 1 | 0 | 0.047497  | -1.609398 | -2.423002 |
| 58 | 1 | 0 | -0.217807 | -3.078798 | -1.479002 |
| 59 | 1 | 0 | 1.031793  | -3.048501 | -2.740002 |
| 60 | 6 | 0 | 3.881999  | -0.837509 | -0.562602 |
| 61 | 1 | 0 | 3.577599  | -0.835509 | 0.486498  |
| 62 | 1 | 0 | 4.289402  | 0.155489  | -0.784702 |
| 63 | 6 | 0 | 2.138692  | -3.265604 | -0.200202 |
| 64 | 1 | 0 | 2.666891  | -3.900206 | -0.919502 |
| 65 | 1 | 0 | 1.310491  | -3.841002 | 0.224298  |
| 66 | 1 | 0 | 2.834793  | -3.013006 | 0.600098  |
| 67 | 6 | 0 | 0.731115  | 4.594900  | -0.689602 |
| 68 | 1 | 0 | 1.355617  | 5.288398  | -0.114802 |
| 69 | 1 | 0 | -0.019183 | 5.193302  | -1.212802 |
| 70 | 1 | 0 | 1.364014  | 4.126898  | -1.449302 |
| 71 | 6 | 0 | -0.764385 | 4.393304  | 1.282198  |
| 72 | 1 | 0 | -1.395987 | 3.769006  | 1.915898  |
| 73 | 1 | 0 | -1.413883 | 5.102706  | 0.759998  |
| 74 | 1 | 0 | -0.096384 | 4.981102  | 1.923498  |
| 75 | 6 | 0 | 5.015396  | -1.852213 | -0.707202 |
| 76 | 6 | 0 | 5.845097  | -1.831915 | -1.971302 |
| 77 | 6 | 0 | 6.581593  | -2.919117 | -2.239502 |

|    |   |   |          |           |           |
|----|---|---|----------|-----------|-----------|
| 78 | 1 | 0 | 6.575991 | -3.767217 | -1.562402 |
| 79 | 1 | 0 | 7.204193 | -2.983919 | -3.127902 |
| 80 | 6 | 0 | 5.838700 | -0.617215 | -2.870002 |
| 81 | 1 | 0 | 4.841401 | -0.390012 | -3.265302 |
| 82 | 1 | 0 | 6.506100 | -0.767417 | -3.723702 |
| 83 | 1 | 0 | 6.180603 | 0.278784  | -2.335802 |
| 84 | 8 | 0 | 5.247494 | -2.660313 | 0.178998  |
| 85 | 6 | 0 | 2.733704 | 0.878094  | 3.753298  |
| 86 | 6 | 0 | 4.069604 | 0.892690  | 4.461398  |
| 87 | 1 | 0 | 4.749002 | 0.138888  | 4.038998  |
| 88 | 1 | 0 | 3.953504 | 0.640490  | 5.524998  |
| 89 | 1 | 0 | 4.561207 | 1.868889  | 4.396698  |
| 90 | 6 | 0 | 2.020601 | -0.450904 | 3.798698  |
| 91 | 1 | 0 | 1.870500 | -0.761604 | 4.842598  |
| 92 | 1 | 0 | 2.637998 | -1.234106 | 3.335398  |
| 93 | 1 | 0 | 1.044900 | -0.453501 | 3.310698  |

---

Conformer 3a-2

---

| Center | Atomic | Atomic | Coordinates (Angstroms) |           |           |
|--------|--------|--------|-------------------------|-----------|-----------|
| Number | Number | Type   | X                       | Y         | Z         |
| 1      | 6      | 0      | 1.130501                | 0.661200  | -0.980004 |
| 2      | 6      | 0      | -0.749798               | 2.417501  | -0.880504 |
| 3      | 6      | 0      | -1.444899               | 1.513101  | 0.166796  |
| 4      | 6      | 0      | -0.902299               | 0.177901  | 0.435896  |
| 5      | 6      | 0      | 0.283400                | -0.225300 | -0.083904 |

|    |   |   |           |           |           |
|----|---|---|-----------|-----------|-----------|
| 6  | 6 | 0 | -3.394900 | -2.254898 | 2.099496  |
| 7  | 1 | 0 | -2.995200 | -2.215398 | 3.109696  |
| 8  | 6 | 0 | -2.777600 | -1.473798 | 1.103496  |
| 9  | 6 | 0 | -1.606400 | -0.652999 | 1.491296  |
| 10 | 6 | 0 | -4.481501 | -3.046697 | 1.784496  |
| 11 | 6 | 0 | -4.982701 | -3.082097 | 0.465496  |
| 12 | 6 | 0 | -4.376301 | -2.308497 | -0.522204 |
| 13 | 1 | 0 | -4.777201 | -2.345097 | -1.530004 |
| 14 | 6 | 0 | -3.279900 | -1.507598 | -0.204204 |
| 15 | 1 | 0 | -2.824100 | -0.895798 | -0.975304 |
| 16 | 8 | 0 | -1.184000 | -0.629099 | 2.640396  |
| 17 | 8 | 0 | -5.159401 | -3.850597 | 2.674196  |
| 18 | 1 | 0 | -4.781201 | -3.744597 | 3.560196  |
| 19 | 8 | 0 | -6.048901 | -3.865097 | 0.162996  |
| 20 | 1 | 0 | -6.328001 | -4.309496 | 0.982896  |
| 21 | 8 | 0 | -2.445098 | 1.910302  | 0.755996  |
| 22 | 8 | 0 | 0.778800  | -1.421800 | 0.302496  |
| 23 | 6 | 0 | 0.171101  | 1.576201  | -1.756604 |
| 24 | 8 | 0 | 0.206701  | 1.659201  | -2.969904 |
| 25 | 6 | 0 | -1.856698 | 3.102501  | -1.736404 |
| 26 | 1 | 0 | -1.363398 | 3.739101  | -2.478304 |
| 27 | 1 | 0 | -2.440498 | 3.748302  | -1.081404 |
| 28 | 6 | 0 | -4.924598 | 2.598703  | -1.237604 |
| 29 | 1 | 0 | -5.465299 | 1.840603  | -0.655804 |

|    |   |   |           |           |           |
|----|---|---|-----------|-----------|-----------|
| 30 | 1 | 0 | -5.687398 | 3.238503  | -1.704604 |
| 31 | 1 | 0 | -4.347798 | 3.195403  | -0.530804 |
| 32 | 6 | 0 | -4.073298 | 1.934903  | -2.291704 |
| 33 | 6 | 0 | -2.759598 | 2.146002  | -2.479304 |
| 34 | 1 | 0 | -2.273399 | 1.605502  | -3.289404 |
| 35 | 6 | 0 | -4.826899 | 0.979403  | -3.188404 |
| 36 | 1 | 0 | -5.650199 | 1.491303  | -3.707004 |
| 37 | 1 | 0 | -5.287299 | 0.170603  | -2.603404 |
| 38 | 1 | 0 | -4.178499 | 0.529603  | -3.947404 |
| 39 | 6 | 0 | 2.024701  | 1.619600  | -0.114904 |
| 40 | 1 | 0 | 2.707602  | 2.101999  | -0.824804 |
| 41 | 1 | 0 | 2.649201  | 1.029299  | 0.559196  |
| 42 | 6 | 0 | 0.215802  | 3.475800  | -0.133004 |
| 43 | 6 | 0 | 1.316602  | 2.726900  | 0.707396  |
| 44 | 1 | 0 | 2.106902  | 3.474200  | 0.865096  |
| 45 | 6 | 0 | 0.903302  | 2.323900  | 2.165396  |
| 46 | 1 | 0 | 0.765902  | 3.255000  | 2.723996  |
| 47 | 6 | 0 | 1.901801  | 1.441800  | 2.877396  |
| 48 | 1 | 0 | 1.709101  | 0.372300  | 2.791796  |
| 49 | 1 | 0 | -0.060199 | 1.814201  | 2.199096  |
| 50 | 6 | 0 | 1.461500  | -2.281100 | -0.676604 |
| 51 | 6 | 0 | 2.585400  | -1.465501 | -1.366304 |
| 52 | 1 | 0 | 2.928400  | -2.074601 | -2.213304 |
| 53 | 6 | 0 | 1.980901  | -0.176000 | -1.963404 |

|    |   |   |           |           |           |
|----|---|---|-----------|-----------|-----------|
| 54 | 1 | 0 | 1.352700  | -0.428400 | -2.821004 |
| 55 | 1 | 0 | 2.778001  | 0.457199  | -2.368004 |
| 56 | 6 | 0 | 0.406399  | -2.768500 | -1.683504 |
| 57 | 1 | 0 | -0.055200 | -1.948799 | -2.241104 |
| 58 | 1 | 0 | -0.388701 | -3.299599 | -1.152204 |
| 59 | 1 | 0 | 0.860199  | -3.456900 | -2.404704 |
| 60 | 6 | 0 | 3.817700  | -1.180201 | -0.452504 |
| 61 | 1 | 0 | 3.517200  | -1.077501 | 0.592696  |
| 62 | 1 | 0 | 4.260600  | -0.226401 | -0.760104 |
| 63 | 6 | 0 | 1.952199  | -3.465100 | 0.153096  |
| 64 | 1 | 0 | 2.450799  | -4.195501 | -0.492704 |
| 65 | 1 | 0 | 1.096099  | -3.952400 | 0.629496  |
| 66 | 1 | 0 | 2.658499  | -3.165301 | 0.927796  |
| 67 | 6 | 0 | 0.938103  | 4.351700  | -1.188404 |
| 68 | 1 | 0 | 1.603103  | 5.056300  | -0.675704 |
| 69 | 1 | 0 | 0.228803  | 4.943400  | -1.773204 |
| 70 | 1 | 0 | 1.542202  | 3.775800  | -1.895204 |
| 71 | 6 | 0 | -0.596097 | 4.434201  | 0.761696  |
| 72 | 1 | 0 | -1.242198 | 3.912101  | 1.468696  |
| 73 | 1 | 0 | -1.226197 | 5.094401  | 0.158096  |
| 74 | 1 | 0 | 0.092203  | 5.075401  | 1.325796  |
| 75 | 6 | 0 | 4.908200  | -2.248902 | -0.512904 |
| 76 | 6 | 0 | 5.742499  | -2.355102 | -1.770204 |
| 77 | 6 | 0 | 6.448899  | -3.480402 | -1.945904 |



|    |   |   |          |           |           |
|----|---|---|----------|-----------|-----------|
| 78 | 1 | 0 | 6.417299 | -4.270402 | -1.202404 |
| 79 | 1 | 0 | 7.071899 | -3.633903 | -2.823104 |
| 80 | 6 | 0 | 5.771800 | -1.218002 | -2.764704 |
| 81 | 1 | 0 | 4.780800 | -0.993802 | -3.176804 |
| 82 | 1 | 0 | 6.432200 | -1.457302 | -3.603504 |
| 83 | 1 | 0 | 6.141700 | -0.292102 | -2.305304 |
| 84 | 8 | 0 | 5.100899 | -3.000402 | 0.430496  |
| 85 | 6 | 0 | 2.958701 | 1.824499  | 3.612596  |
| 86 | 6 | 0 | 3.846301 | 0.805599  | 4.287296  |
| 87 | 1 | 0 | 4.889201 | 0.899998  | 3.952196  |
| 88 | 1 | 0 | 3.516600 | -0.218801 | 4.087896  |
| 89 | 1 | 0 | 3.857701 | 0.952199  | 5.376696  |
| 90 | 6 | 0 | 3.356202 | 3.261399  | 3.850896  |
| 91 | 1 | 0 | 3.391402 | 3.481899  | 4.926996  |
| 92 | 1 | 0 | 2.676103 | 3.978399  | 3.383696  |
| 93 | 1 | 0 | 4.366402 | 3.456299  | 3.463896  |

---

Conformer 3a-3

---

| Center | Atomic | Atomic | Coordinates (Angstroms) |           |           |
|--------|--------|--------|-------------------------|-----------|-----------|
| Number | Number | Type   | X                       | Y         | Z         |
| 1      | 6      | 0      | 1.427605                | 0.512597  | -0.967797 |
| 2      | 6      | 0      | -0.672387               | 1.871809  | -1.579397 |
| 3      | 6      | 0      | -1.403192               | 1.142014  | -0.428097 |
| 4      | 6      | 0      | -0.727298               | 0.041410  | 0.265003  |
| 5      | 6      | 0      | 0.574400                | -0.254598 | 0.029303  |

|    |   |   |           |           |           |
|----|---|---|-----------|-----------|-----------|
| 6  | 6 | 0 | -3.011812 | -2.413277 | 2.174903  |
| 7  | 1 | 0 | -2.853310 | -2.022778 | 3.177103  |
| 8  | 6 | 0 | -2.359509 | -1.781481 | 1.098503  |
| 9  | 6 | 0 | -1.491502 | -0.618186 | 1.397703  |
| 10 | 6 | 0 | -3.831919 | -3.500572 | 1.946203  |
| 11 | 6 | 0 | -4.026621 | -3.986871 | 0.635403  |
| 12 | 6 | 0 | -3.387618 | -3.360875 | -0.433197 |
| 13 | 1 | 0 | -3.554520 | -3.743574 | -1.434897 |
| 14 | 6 | 0 | -2.558211 | -2.263880 | -0.202097 |
| 15 | 1 | 0 | -2.078809 | -1.770482 | -1.040897 |
| 16 | 8 | 0 | -1.378099 | -0.170187 | 2.531503  |
| 17 | 8 | 0 | -4.513323 | -4.196668 | 2.919603  |
| 18 | 1 | 0 | -4.362720 | -3.780769 | 3.782003  |
| 19 | 8 | 0 | -4.832628 | -5.056466 | 0.418603  |
| 20 | 1 | 0 | -5.187929 | -5.335764 | 1.280903  |
| 21 | 8 | 0 | -2.540790 | 1.473520  | -0.110397 |
| 22 | 8 | 0 | 1.161695  | -1.207001 | 0.788003  |
| 23 | 6 | 0 | 0.493608  | 1.024803  | -2.073697 |
| 24 | 8 | 0 | 0.726107  | 0.820101  | -3.250397 |
| 25 | 6 | 0 | -1.701286 | 2.116815  | -2.723897 |
| 26 | 1 | 0 | -1.183783 | 2.635612  | -3.537097 |
| 27 | 1 | 0 | -2.476982 | 2.782220  | -2.346397 |
| 28 | 6 | 0 | -4.693191 | 1.158733  | -2.477597 |
| 29 | 1 | 0 | -5.184595 | 0.473336  | -1.774297 |

|    |   |   |           |           |           |
|----|---|---|-----------|-----------|-----------|
| 30 | 1 | 0 | -5.468089 | 1.494837  | -3.181597 |
| 31 | 1 | 0 | -4.344186 | 2.014931  | -1.900297 |
| 32 | 6 | 0 | -3.586296 | 0.443426  | -3.211697 |
| 33 | 6 | 0 | -2.310593 | 0.857319  | -3.294497 |
| 34 | 1 | 0 | -1.619597 | 0.245015  | -3.870797 |
| 35 | 6 | 0 | -4.019503 | -0.829571 | -3.902497 |
| 36 | 1 | 0 | -4.826302 | -0.633166 | -4.622897 |
| 37 | 1 | 0 | -4.421807 | -1.552669 | -3.178697 |
| 38 | 1 | 0 | -3.194006 | -1.305976 | -4.441497 |
| 39 | 6 | 0 | 2.034812  | 1.804294  | -0.313097 |
| 40 | 1 | 0 | 2.734915  | 2.207989  | -1.055297 |
| 41 | 1 | 0 | 2.637311  | 1.516490  | 0.552903  |
| 42 | 6 | 0 | -0.008879 | 3.237005  | -1.019797 |
| 43 | 6 | 0 | 1.047519  | 2.924699  | 0.109003  |
| 44 | 1 | 0 | 1.675124  | 3.826096  | 0.152603  |
| 45 | 6 | 0 | 0.511318  | 2.746802  | 1.566203  |
| 46 | 1 | 0 | -0.440985 | 2.221408  | 1.598603  |
| 47 | 6 | 0 | 0.420925  | 4.039903  | 2.341403  |
| 48 | 1 | 0 | 1.225630  | 4.752198  | 2.142003  |
| 49 | 1 | 0 | 1.213714  | 2.082698  | 2.092703  |
| 50 | 6 | 0 | 2.096389  | -2.159107 | 0.170303  |
| 51 | 6 | 0 | 3.197894  | -1.366313 | -0.580197 |
| 52 | 1 | 0 | 3.745490  | -2.102516 | -1.183397 |
| 53 | 6 | 0 | 2.530800  | -0.388309 | -1.574497 |

|    |   |   |           |           |           |
|----|---|---|-----------|-----------|-----------|
| 54 | 1 | 0 | 2.087796  | -0.951007 | -2.399997 |
| 55 | 1 | 0 | 3.291203  | 0.248686  | -2.039097 |
| 56 | 6 | 0 | 1.291884  | -3.057702 | -0.782797 |
| 57 | 1 | 0 | 0.827187  | -2.495099 | -1.596797 |
| 58 | 1 | 0 | 0.495581  | -3.563297 | -0.228997 |
| 59 | 1 | 0 | 1.943679  | -3.819406 | -1.224197 |
| 60 | 6 | 0 | 4.223998  | -0.658819 | 0.357103  |
| 61 | 1 | 0 | 3.748000  | -0.332516 | 1.285103  |
| 62 | 1 | 0 | 4.595803  | 0.236979  | -0.153397 |
| 63 | 6 | 0 | 2.600084  | -2.992710 | 1.346203  |
| 64 | 1 | 0 | 3.289080  | -3.766214 | 0.991203  |
| 65 | 1 | 0 | 1.750381  | -3.483305 | 1.830503  |
| 66 | 1 | 0 | 3.124488  | -2.390413 | 2.088903  |
| 67 | 6 | 0 | 0.731125  | 3.957001  | -2.175997 |
| 68 | 1 | 0 | 1.199930  | 4.869998  | -1.791197 |
| 69 | 1 | 0 | 0.039327  | 4.257305  | -2.967397 |
| 70 | 1 | 0 | 1.512721  | 3.347997  | -2.639697 |
| 71 | 6 | 0 | -1.089974 | 4.205612  | -0.503097 |
| 72 | 1 | 0 | -1.735276 | 3.756316  | 0.252303  |
| 73 | 1 | 0 | -1.724372 | 4.555115  | -1.323597 |
| 74 | 1 | 0 | -0.610268 | 5.084709  | -0.059997 |
| 75 | 6 | 0 | 5.431193  | -1.514726 | 0.740103  |
| 76 | 6 | 0 | 6.459391  | -1.827332 | -0.324097 |
| 77 | 6 | 0 | 7.308585  | -2.834937 | -0.079697 |

|    |   |   |           |           |           |
|----|---|---|-----------|-----------|-----------|
| 78 | 1 | 0 | 7.250082  | -3.388837 | 0.851803  |
| 79 | 1 | 0 | 8.075884  | -3.122442 | -0.793597 |
| 80 | 6 | 0 | 6.516096  | -1.011633 | -1.594697 |
| 81 | 1 | 0 | 5.584296  | -1.062927 | -2.170197 |
| 82 | 1 | 0 | 7.324294  | -1.364237 | -2.242297 |
| 83 | 1 | 0 | 6.701102  | 0.049466  | -1.382597 |
| 84 | 8 | 0 | 5.562791  | -1.935827 | 1.879003  |
| 85 | 6 | 0 | -0.491573 | 4.386608  | 3.262403  |
| 86 | 6 | 0 | -0.405865 | 5.720308  | 3.967203  |
| 87 | 1 | 0 | -1.319961 | 6.310013  | 3.807703  |
| 88 | 1 | 0 | 0.445839  | 6.314903  | 3.621003  |
| 89 | 1 | 0 | -0.309166 | 5.589007  | 5.054403  |
| 90 | 6 | 0 | -1.653978 | 3.523715  | 3.691503  |
| 91 | 1 | 0 | -1.622479 | 3.359915  | 4.777903  |
| 92 | 1 | 0 | -1.675783 | 2.542115  | 3.213703  |
| 93 | 1 | 0 | -2.608475 | 4.028421  | 3.484303  |

---

Conformer 3b-1

| Center | Atomic | Atomic | Coordinates (Angstroms) |           |           |
|--------|--------|--------|-------------------------|-----------|-----------|
| Number | Number | Type   | X                       | Y         | Z         |
| 1      | 6      | 0      | 1.219500                | 0.684897  | -0.660389 |
| 2      | 6      | 0      | -0.543702               | 2.526595  | -0.348689 |
| 3      | 6      | 0      | -1.358201               | 1.510794  | 0.488911  |
| 4      | 6      | 0      | -0.939299               | 0.107294  | 0.513311  |
| 5      | 6      | 0      | 0.261001                | -0.281005 | 0.009511  |

|    |   |   |           |           |           |
|----|---|---|-----------|-----------|-----------|
| 6  | 6 | 0 | -3.770396 | -2.337609 | 1.453811  |
| 7  | 1 | 0 | -3.490996 | -2.504809 | 2.491011  |
| 8  | 6 | 0 | -2.978597 | -1.468708 | 0.677811  |
| 9  | 6 | 0 | -1.797098 | -0.846207 | 1.320011  |
| 10 | 6 | 0 | -4.873596 | -2.953311 | 0.896711  |
| 11 | 6 | 0 | -5.215496 | -2.723511 | -0.453389 |
| 12 | 6 | 0 | -4.434697 | -1.864710 | -1.224589 |
| 13 | 1 | 0 | -4.713897 | -1.697010 | -2.259689 |
| 14 | 6 | 0 | -3.323298 | -1.238909 | -0.660789 |
| 15 | 1 | 0 | -2.730198 | -0.559108 | -1.262789 |
| 16 | 8 | 0 | -1.499998 | -1.086207 | 2.484611  |
| 17 | 8 | 0 | -5.716695 | -3.818212 | 1.559111  |
| 18 | 1 | 0 | -5.446695 | -3.887311 | 2.487311  |
| 19 | 8 | 0 | -6.298795 | -3.334912 | -0.994889 |
| 20 | 1 | 0 | -6.712095 | -3.872113 | -0.295989 |
| 21 | 8 | 0 | -2.352101 | 1.877392  | 1.108411  |
| 22 | 8 | 0 | 0.644103  | -1.556604 | 0.216411  |
| 23 | 6 | 0 | 0.368599  | 1.781496  | -1.313289 |
| 24 | 8 | 0 | 0.476998  | 2.057096  | -2.492689 |
| 25 | 6 | 0 | -1.553503 | 3.428793  | -1.119689 |
| 26 | 1 | 0 | -0.977904 | 4.140994  | -1.719689 |
| 27 | 1 | 0 | -2.126604 | 3.997793  | -0.388189 |
| 28 | 6 | 0 | -4.669003 | 3.092990  | -0.851189 |
| 29 | 1 | 0 | -5.306002 | 2.296089  | -0.445089 |

|    |   |   |           |           |           |
|----|---|---|-----------|-----------|-----------|
| 30 | 1 | 0 | -5.345704 | 3.874389  | -1.226289 |
| 31 | 1 | 0 | -4.089903 | 3.496890  | -0.020389 |
| 32 | 6 | 0 | -3.810102 | 2.553091  | -1.967989 |
| 33 | 6 | 0 | -2.476002 | 2.685692  | -2.056689 |
| 34 | 1 | 0 | -1.982502 | 2.254693  | -2.925889 |
| 35 | 6 | 0 | -4.578701 | 1.832590  | -3.051889 |
| 36 | 1 | 0 | -5.329102 | 2.493589  | -3.508589 |
| 37 | 1 | 0 | -5.131500 | 0.976489  | -2.640189 |
| 38 | 1 | 0 | -3.921601 | 1.467791  | -3.848289 |
| 39 | 6 | 0 | 2.139999  | 1.397698  | 0.393911  |
| 40 | 1 | 0 | 2.913199  | 1.908299  | -0.191789 |
| 41 | 1 | 0 | 2.656700  | 0.642298  | 0.995411  |
| 42 | 6 | 0 | 0.445497  | 3.364396  | 0.608211  |
| 43 | 6 | 0 | 1.468798  | 2.418097  | 1.350611  |
| 44 | 1 | 0 | 2.280997  | 3.098998  | 1.643811  |
| 45 | 6 | 0 | 1.026099  | 1.771796  | 2.700111  |
| 46 | 1 | 0 | 0.478398  | 2.525196  | 3.279311  |
| 47 | 6 | 0 | 2.230999  | 1.356698  | 3.508911  |
| 48 | 1 | 0 | 2.955298  | 2.160699  | 3.665711  |
| 49 | 1 | 0 | 0.338500  | 0.937496  | 2.562311  |
| 50 | 6 | 0 | 1.523304  | -2.297303 | -0.701289 |
| 51 | 6 | 0 | 2.655003  | -1.359802 | -1.187189 |
| 52 | 1 | 0 | 3.267402  | -1.140501 | -0.301089 |
| 53 | 6 | 0 | 2.068801  | -0.043602 | -1.716589 |

|    |   |   |           |           |           |
|----|---|---|-----------|-----------|-----------|
| 54 | 1 | 0 | 1.455801  | -0.232803 | -2.603989 |
| 55 | 1 | 0 | 2.868100  | 0.618499  | -2.058789 |
| 56 | 6 | 0 | 0.635504  | -2.844504 | -1.826189 |
| 57 | 1 | 0 | 0.218103  | -2.045305 | -2.445489 |
| 58 | 1 | 0 | -0.197895 | -3.404505 | -1.391789 |
| 59 | 1 | 0 | 1.201205  | -3.519303 | -2.476589 |
| 60 | 6 | 0 | 3.573503  | -2.029601 | -2.247589 |
| 61 | 1 | 0 | 3.055403  | -2.070501 | -3.210289 |
| 62 | 1 | 0 | 3.816105  | -3.052400 | -1.944289 |
| 63 | 6 | 0 | 2.040605  | -3.436402 | 0.179911  |
| 64 | 1 | 0 | 2.643406  | -4.142402 | -0.398589 |
| 65 | 1 | 0 | 1.196406  | -3.982603 | 0.610911  |
| 66 | 1 | 0 | 2.646904  | -3.044202 | 1.002911  |
| 67 | 6 | 0 | 1.281396  | 4.350197  | -0.250689 |
| 68 | 1 | 0 | 1.940795  | 4.928397  | 0.406811  |
| 69 | 1 | 0 | 0.644795  | 5.064396  | -0.779689 |
| 70 | 1 | 0 | 1.907696  | 3.854297  | -0.997989 |
| 71 | 6 | 0 | -0.350004 | 4.216795  | 1.616611  |
| 72 | 1 | 0 | -1.088803 | 3.637894  | 2.173111  |
| 73 | 1 | 0 | -0.878305 | 5.027794  | 1.106111  |
| 74 | 1 | 0 | 0.341895  | 4.681196  | 2.330011  |
| 75 | 6 | 0 | 4.849402  | -1.217799 | -2.464589 |
| 76 | 6 | 0 | 6.052103  | -1.484298 | -1.589889 |
| 77 | 6 | 0 | 7.086502  | -0.638296 | -1.696689 |



|    |   |   |          |           |           |
|----|---|---|----------|-----------|-----------|
| 78 | 1 | 0 | 7.042901 | 0.194103  | -2.391489 |
| 79 | 1 | 0 | 7.988302 | -0.758995 | -1.102589 |
| 80 | 6 | 0 | 6.067804 | -2.663798 | -0.646489 |
| 81 | 1 | 0 | 5.246004 | -2.626499 | 0.079211  |
| 82 | 1 | 0 | 7.005104 | -2.693197 | -0.083189 |
| 83 | 1 | 0 | 5.975205 | -3.615998 | -1.184689 |
| 84 | 8 | 0 | 4.870201 | -0.341399 | -3.316089 |
| 85 | 6 | 0 | 2.519501 | 0.167498  | 4.062711  |
| 86 | 6 | 0 | 3.789401 | -0.012100 | 4.863611  |
| 87 | 1 | 0 | 3.564001 | -0.301601 | 5.899911  |
| 88 | 1 | 0 | 4.393000 | 0.900900  | 4.891511  |
| 89 | 1 | 0 | 4.410302 | -0.818700 | 4.447611  |
| 90 | 6 | 0 | 1.653102 | -1.065703 | 3.984711  |
| 91 | 1 | 0 | 1.369703 | -1.392403 | 4.995511  |
| 92 | 1 | 0 | 2.215403 | -1.901902 | 3.543311  |
| 93 | 1 | 0 | 0.734602 | -0.933604 | 3.410911  |

---

Conformer 3b-2

---

| Center | Atomic | Atomic | Coordinates (Angstroms) |           |           |
|--------|--------|--------|-------------------------|-----------|-----------|
| Number | Number | Type   | X                       | Y         | Z         |
| 1      | 6      | 0      | 1.196501                | 0.431404  | -0.809905 |
| 2      | 6      | 0      | -0.541903               | 2.323101  | -0.883005 |
| 3      | 6      | 0      | -1.386701               | 1.497899  | 0.116895  |
| 4      | 6      | 0      | -0.964998               | 0.137000  | 0.460895  |
| 5      | 6      | 0      | 0.236103                | -0.352798 | 0.059895  |

|    |   |   |           |           |           |
|----|---|---|-----------|-----------|-----------|
| 6  | 6 | 0 | -3.804793 | -1.963906 | 2.012595  |
| 7  | 1 | 0 | -3.469893 | -1.934706 | 3.046495  |
| 8  | 6 | 0 | -3.036095 | -1.295605 | 1.040195  |
| 9  | 6 | 0 | -1.803796 | -0.602102 | 1.484395  |
| 10 | 6 | 0 | -4.956792 | -2.631709 | 1.646495  |
| 11 | 6 | 0 | -5.371992 | -2.655210 | 0.297795  |
| 12 | 6 | 0 | -4.613593 | -1.995508 | -0.667405 |
| 13 | 1 | 0 | -4.949493 | -2.021309 | -1.699005 |
| 14 | 6 | 0 | -3.452595 | -1.317806 | -0.297405 |
| 15 | 1 | 0 | -2.876996 | -0.792704 | -1.052305 |
| 16 | 8 | 0 | -1.442596 | -0.611901 | 2.654995  |
| 17 | 8 | 0 | -5.783390 | -3.315911 | 2.510795  |
| 18 | 1 | 0 | -5.463691 | -3.206610 | 3.418995  |
| 19 | 8 | 0 | -6.504190 | -3.315312 | -0.055005 |
| 20 | 1 | 0 | -6.891290 | -3.687413 | 0.757095  |
| 21 | 8 | 0 | -2.396702 | 1.982997  | 0.617695  |
| 22 | 8 | 0 | 0.629706  | -1.543297 | 0.557495  |
| 23 | 6 | 0 | 0.367799  | 1.389403  | -1.673705 |
| 24 | 8 | 0 | 0.494699  | 1.430803  | -2.882305 |
| 25 | 6 | 0 | -1.517704 | 3.077399  | -1.834505 |
| 26 | 1 | 0 | -0.913905 | 3.647600  | -2.547405 |
| 27 | 1 | 0 | -2.092706 | 3.789497  | -1.243205 |
| 28 | 6 | 0 | -4.644704 | 2.830392  | -1.557205 |
| 29 | 1 | 0 | -5.292902 | 2.127090  | -1.017705 |

|    |   |   |           |           |           |
|----|---|---|-----------|-----------|-----------|
| 30 | 1 | 0 | -5.310105 | 3.531190  | -2.082005 |
| 31 | 1 | 0 | -4.072305 | 3.378193  | -0.808405 |
| 32 | 6 | 0 | -3.776802 | 2.085094  | -2.540905 |
| 33 | 6 | 0 | -2.439902 | 2.184397  | -2.631705 |
| 34 | 1 | 0 | -1.942001 | 1.593898  | -3.398405 |
| 35 | 6 | 0 | -4.538900 | 1.183392  | -3.485105 |
| 36 | 1 | 0 | -5.275201 | 1.754891  | -4.068405 |
| 37 | 1 | 0 | -5.108798 | 0.423791  | -2.931405 |
| 38 | 1 | 0 | -3.875499 | 0.671094  | -4.189505 |
| 39 | 6 | 0 | 2.121200  | 1.340406  | 0.069895  |
| 40 | 1 | 0 | 2.863899  | 1.758308  | -0.620505 |
| 41 | 1 | 0 | 2.678001  | 0.719708  | 0.778695  |
| 42 | 6 | 0 | 0.449895  | 3.316803  | -0.077705 |
| 43 | 6 | 0 | 1.447797  | 2.507005  | 0.835795  |
| 44 | 1 | 0 | 2.274896  | 3.203807  | 1.030795  |
| 45 | 6 | 0 | 0.924098  | 2.154404  | 2.269895  |
| 46 | 1 | 0 | 0.789796  | 3.101003  | 2.801995  |
| 47 | 6 | 0 | 1.839400  | 1.249606  | 3.060595  |
| 48 | 1 | 0 | 1.620602  | 0.185605  | 2.969195  |
| 49 | 1 | 0 | -0.058701 | 1.682102  | 2.250195  |
| 50 | 6 | 0 | 1.458408  | -2.487195 | -0.205905 |
| 51 | 6 | 0 | 2.598906  | -1.706593 | -0.904905 |
| 52 | 1 | 0 | 3.238705  | -1.322991 | -0.097505 |
| 53 | 6 | 0 | 2.033204  | -0.513994 | -1.690805 |

|    |   |   |           |           |           |
|----|---|---|-----------|-----------|-----------|
| 54 | 1 | 0 | 1.415704  | -0.870595 | -2.522005 |
| 55 | 1 | 0 | 2.844502  | 0.049308  | -2.158905 |
| 56 | 6 | 0 | 0.521009  | -3.227397 | -1.168505 |
| 57 | 1 | 0 | 0.100208  | -2.559198 | -1.925605 |
| 58 | 1 | 0 | -0.310190 | -3.660099 | -0.604005 |
| 59 | 1 | 0 | 1.045911  | -4.038296 | -1.683405 |
| 60 | 6 | 0 | 3.468408  | -2.613291 | -1.820205 |
| 61 | 1 | 0 | 2.930708  | -2.814892 | -2.751405 |
| 62 | 1 | 0 | 3.668910  | -3.568690 | -1.327005 |
| 63 | 6 | 0 | 1.972110  | -3.431994 | 0.881895  |
| 64 | 1 | 0 | 2.546312  | -4.257693 | 0.451995  |
| 65 | 1 | 0 | 1.126811  | -3.854896 | 1.432595  |
| 66 | 1 | 0 | 2.605809  | -2.893393 | 1.593995  |
| 67 | 6 | 0 | 1.292594  | 4.129305  | -1.094305 |
| 68 | 1 | 0 | 1.979692  | 4.787806  | -0.550205 |
| 69 | 1 | 0 | 0.661192  | 4.766803  | -1.718905 |
| 70 | 1 | 0 | 1.888395  | 3.503306  | -1.764505 |
| 71 | 6 | 0 | -0.347707 | 4.336501  | 0.760395  |
| 72 | 1 | 0 | -1.061606 | 3.865000  | 1.437095  |
| 73 | 1 | 0 | -0.902908 | 5.024700  | 0.115995  |
| 74 | 1 | 0 | 0.347892  | 4.943303  | 1.352795  |
| 75 | 6 | 0 | 4.775707  | -1.919888 | -2.200305 |
| 76 | 6 | 0 | 5.991207  | -2.104285 | -1.321805 |
| 77 | 6 | 0 | 7.069805  | -1.359483 | -1.602805 |

|    |   |   |          |           |           |
|----|---|---|----------|-----------|-----------|
| 78 | 1 | 0 | 7.052204 | -0.661583 | -2.433705 |
| 79 | 1 | 0 | 7.983305 | -1.432581 | -1.018905 |
| 80 | 6 | 0 | 5.970709 | -3.097785 | -0.184305 |
| 81 | 1 | 0 | 5.174209 | -2.883887 | 0.538795  |
| 82 | 1 | 0 | 6.921609 | -3.083183 | 0.356395  |
| 83 | 1 | 0 | 5.809611 | -4.122786 | -0.542605 |
| 84 | 8 | 0 | 4.813005 | -1.198988 | -3.186405 |
| 85 | 6 | 0 | 2.853099 | 1.606508  | 3.865995  |
| 86 | 6 | 0 | 3.656601 | 0.566910  | 4.610995  |
| 87 | 1 | 0 | 4.724001 | 0.626212  | 4.353295  |
| 88 | 1 | 0 | 3.308903 | -0.448191 | 4.394395  |
| 89 | 1 | 0 | 3.592601 | 0.721710  | 5.697495  |
| 90 | 6 | 0 | 3.281096 | 3.032009  | 4.119095  |
| 91 | 1 | 0 | 3.252395 | 3.262609  | 5.193295  |
| 92 | 1 | 0 | 2.656894 | 3.765207  | 3.601995  |
| 93 | 1 | 0 | 4.320196 | 3.190511  | 3.797395  |

---

Conformer 3b-3

---

| Center | Atomic | Atomic | Coordinates (Angstroms) |           |           |
|--------|--------|--------|-------------------------|-----------|-----------|
| Number | Number | Type   | X                       | Y         | Z         |
| 1      | 6      | 0      | -1.497797               | 0.158706  | 0.715199  |
| 2      | 6      | 0      | 0.293803                | 1.755606  | 1.635599  |
| 3      | 6      | 0      | 1.243803                | 1.226705  | 0.535099  |
| 4      | 6      | 0      | 0.814803                | 0.099806  | -0.297801 |
| 5      | 6      | 0      | -0.452897               | -0.380094 | -0.242001 |

|    |   |   |           |           |           |
|----|---|---|-----------|-----------|-----------|
| 6  | 6 | 0 | 3.627203  | -1.844495 | -2.083701 |
| 7  | 1 | 0 | 3.547203  | -1.371695 | -3.059401 |
| 8  | 6 | 0 | 2.757503  | -1.420495 | -1.060501 |
| 9  | 6 | 0 | 1.780503  | -0.351395 | -1.376201 |
| 10 | 6 | 0 | 4.556802  | -2.835295 | -1.836701 |
| 11 | 6 | 0 | 4.644902  | -3.431795 | -0.560401 |
| 12 | 6 | 0 | 3.788202  | -3.012995 | 0.455799  |
| 13 | 1 | 0 | 3.874902  | -3.477295 | 1.432899  |
| 14 | 6 | 0 | 2.849603  | -2.012195 | 0.206499  |
| 15 | 1 | 0 | 2.197603  | -1.678295 | 1.006499  |
| 16 | 8 | 0 | 1.738903  | 0.179505  | -2.479101 |
| 17 | 8 | 0 | 5.452502  | -3.328095 | -2.760001 |
| 18 | 1 | 0 | 5.365602  | -2.836295 | -3.590501 |
| 19 | 8 | 0 | 5.560302  | -4.405495 | -0.325601 |
| 20 | 1 | 0 | 6.065502  | -4.537296 | -1.147301 |
| 21 | 8 | 0 | 2.343703  | 1.743605  | 0.367299  |
| 22 | 8 | 0 | -0.815197 | -1.305794 | -1.155501 |
| 23 | 6 | 0 | -0.765497 | 0.704906  | 1.945999  |
| 24 | 8 | 0 | -1.074497 | 0.365406  | 3.072099  |
| 25 | 6 | 0 | 1.148103  | 2.067505  | 2.900599  |
| 26 | 1 | 0 | 0.471504  | 2.429506  | 3.681099  |
| 27 | 1 | 0 | 1.836504  | 2.875605  | 2.656099  |
| 28 | 6 | 0 | 4.267703  | 1.615605  | 2.938399  |
| 29 | 1 | 0 | 4.925303  | 1.081805  | 2.239399  |

|    |   |   |           |           |           |
|----|---|---|-----------|-----------|-----------|
| 30 | 1 | 0 | 4.909803  | 1.995305  | 3.746299  |
| 31 | 1 | 0 | 3.843904  | 2.461705  | 2.396999  |
| 32 | 6 | 0 | 3.224103  | 0.676405  | 3.490199  |
| 33 | 6 | 0 | 1.896203  | 0.877405  | 3.454299  |
| 34 | 1 | 0 | 1.260203  | 0.117405  | 3.904399  |
| 35 | 6 | 0 | 3.787703  | -0.570295 | 4.133299  |
| 36 | 1 | 0 | 4.479903  | -0.316995 | 4.948899  |
| 37 | 1 | 0 | 4.367603  | -1.158795 | 3.407899  |
| 38 | 1 | 0 | 3.001203  | -1.211495 | 4.544499  |
| 39 | 6 | 0 | -2.253397 | 1.388306  | 0.104099  |
| 40 | 1 | 0 | -3.053797 | 1.625106  | 0.815699  |
| 41 | 1 | 0 | -2.747797 | 1.082606  | -0.824701 |
| 42 | 6 | 0 | -0.516596 | 3.043206  | 1.083199  |
| 43 | 6 | 0 | -1.412896 | 2.663806  | -0.159601 |
| 44 | 1 | 0 | -2.158896 | 3.469206  | -0.213301 |
| 45 | 6 | 0 | -0.733196 | 2.662206  | -1.567301 |
| 46 | 1 | 0 | 0.283503  | 2.275506  | -1.540201 |
| 47 | 6 | 0 | -0.766196 | 4.004106  | -2.258701 |
| 48 | 1 | 0 | -1.689296 | 4.571306  | -2.114001 |
| 49 | 1 | 0 | -1.287097 | 1.944106  | -2.191601 |
| 50 | 6 | 0 | -1.792497 | -2.366294 | -0.870101 |
| 51 | 6 | 0 | -2.987097 | -1.754494 | -0.096701 |
| 52 | 1 | 0 | -3.479297 | -1.066194 | -0.798501 |
| 53 | 6 | 0 | -2.489197 | -0.949994 | 1.113499  |

|    |   |   |           |           |           |
|----|---|---|-----------|-----------|-----------|
| 54 | 1 | 0 | -2.009497 | -1.616994 | 1.837599  |
| 55 | 1 | 0 | -3.333297 | -0.508294 | 1.648999  |
| 56 | 6 | 0 | -1.052298 | -3.469794 | -0.104801 |
| 57 | 1 | 0 | -0.722398 | -3.132494 | 0.882099  |
| 58 | 1 | 0 | -0.166398 | -3.774294 | -0.669501 |
| 59 | 1 | 0 | -1.692598 | -4.347094 | 0.031199  |
| 60 | 6 | 0 | -4.031098 | -2.821993 | 0.336499  |
| 61 | 1 | 0 | -3.646198 | -3.386694 | 1.190899  |
| 62 | 1 | 0 | -4.218098 | -3.522993 | -0.482101 |
| 63 | 6 | 0 | -2.180598 | -2.845694 | -2.270101 |
| 64 | 1 | 0 | -2.853398 | -3.706694 | -2.222501 |
| 65 | 1 | 0 | -1.283398 | -3.144594 | -2.820001 |
| 66 | 1 | 0 | -2.670997 | -2.043894 | -2.831701 |
| 67 | 6 | 0 | -1.455496 | 3.571506  | 2.198299  |
| 68 | 1 | 0 | -2.037896 | 4.415006  | 1.810099  |
| 69 | 1 | 0 | -0.888096 | 3.940006  | 3.057199  |
| 70 | 1 | 0 | -2.159096 | 2.820606  | 2.570099  |
| 71 | 6 | 0 | 0.447004  | 4.191206  | 0.724999  |
| 72 | 1 | 0 | 1.207904  | 3.897805  | 0.001399  |
| 73 | 1 | 0 | 0.958304  | 4.564806  | 1.617599  |
| 74 | 1 | 0 | -0.122896 | 5.023806  | 0.298999  |
| 75 | 6 | 0 | -5.335897 | -2.167493 | 0.787799  |
| 76 | 6 | 0 | -6.410397 | -1.881493 | -0.235601 |
| 77 | 6 | 0 | -7.466897 | -1.162693 | 0.169799  |



|    |   |   |           |           |           |
|----|---|---|-----------|-----------|-----------|
| 78 | 1 | 0 | -7.530797 | -0.814193 | 1.195599  |
| 79 | 1 | 0 | -8.281797 | -0.913393 | -0.504301 |
| 80 | 6 | 0 | -6.280797 | -2.399693 | -1.648401 |
| 81 | 1 | 0 | -5.369197 | -2.039593 | -2.140701 |
| 82 | 1 | 0 | -7.133097 | -2.079793 | -2.255101 |
| 83 | 1 | 0 | -6.247098 | -3.496493 | -1.677901 |
| 84 | 8 | 0 | -5.480297 | -1.852293 | 1.959599  |
| 85 | 6 | 0 | 0.169904  | 4.550506  | -3.050101 |
| 86 | 6 | 0 | -0.055596 | 5.902806  | -3.685401 |
| 87 | 1 | 0 | 0.729204  | 6.613606  | -3.389501 |
| 88 | 1 | 0 | -1.023696 | 6.331606  | -3.406301 |
| 89 | 1 | 0 | -0.015496 | 5.838006  | -4.782001 |
| 90 | 6 | 0 | 1.494404  | 3.910905  | -3.390601 |
| 91 | 1 | 0 | 1.601304  | 3.819705  | -4.480901 |
| 92 | 1 | 0 | 1.628204  | 2.914205  | -2.965001 |
| 93 | 1 | 0 | 2.327604  | 4.543705  | -3.052601 |

---

Conformer 5a-1

---

| Center | Atomic | Atomic | Coordinates (Angstroms) |           |           |
|--------|--------|--------|-------------------------|-----------|-----------|
| Number | Number | Type   | X                       | Y         | Z         |
| 1      | 6      | 0      | 1.328561                | -0.505109 | 0.597310  |
| 2      | 6      | 0      | 0.277405                | 1.665000  | 1.413197  |
| 3      | 6      | 0      | -0.610880               | 1.590842  | 0.186828  |
| 4      | 6      | 0      | -0.682119               | 0.549752  | -0.680063 |
| 5      | 6      | 0      | 0.202928                | -0.601906 | -0.476463 |

|    |   |   |           |           |           |
|----|---|---|-----------|-----------|-----------|
| 6  | 6 | 0 | 1.571385  | 0.923231  | 1.057851  |
| 7  | 8 | 0 | 2.667420  | 1.425691  | 1.218801  |
| 8  | 6 | 0 | 0.739241  | -1.225707 | 1.857362  |
| 9  | 6 | 0 | -0.339754 | 0.956711  | 2.721395  |
| 10 | 6 | 0 | -0.531952 | -0.571466 | 2.430415  |
| 11 | 6 | 0 | -1.043492 | -1.404472 | 3.642248  |
| 12 | 6 | 0 | -1.503125 | -2.788728 | 3.246767  |
| 13 | 6 | 0 | -2.755386 | -3.183397 | 2.964439  |
| 14 | 6 | 0 | -3.041210 | -4.602150 | 2.533495  |
| 15 | 6 | 0 | -3.973942 | -2.294046 | 3.018393  |
| 16 | 6 | 0 | -1.698258 | 1.602465  | 3.060267  |
| 17 | 6 | 0 | 0.623277  | 1.174882  | 3.909226  |
| 18 | 6 | 0 | 2.605768  | -1.249651 | 0.142545  |
| 19 | 6 | 0 | 3.503298  | -0.590014 | -0.942584 |
| 20 | 6 | 0 | -2.651787 | -0.254374 | -2.180175 |
| 21 | 6 | 0 | -1.494531 | 0.654798  | -1.955356 |
| 22 | 6 | 0 | 2.763604  | -0.261735 | -2.235383 |
| 23 | 6 | 0 | 4.750003  | -1.468039 | -1.221065 |
| 24 | 8 | 0 | 0.070513  | -1.646511 | -1.103352 |
| 25 | 6 | 0 | 2.454717  | 1.007903  | -2.529539 |
| 26 | 8 | 0 | -1.191056 | 1.509125  | -2.777958 |
| 27 | 6 | 0 | -3.059200 | -1.206229 | -1.231523 |
| 28 | 6 | 0 | -4.168653 | -2.003986 | -1.472944 |
| 29 | 6 | 0 | -4.882561 | -1.857280 | -2.674667 |

|    |   |   |           |           |           |
|----|---|---|-----------|-----------|-----------|
| 30 | 6 | 0 | -4.482747 | -0.917538 | -3.623648 |
| 31 | 6 | 0 | -3.372614 | -0.116923 | -3.375631 |
| 32 | 6 | 0 | 2.408071  | -1.390676 | -3.174253 |
| 33 | 6 | 0 | 5.771469  | -1.514554 | -0.064273 |
| 34 | 6 | 0 | 7.019969  | -2.310520 | -0.389712 |
| 35 | 6 | 0 | 7.960526  | -1.720557 | -1.413569 |
| 36 | 6 | 0 | 7.279242  | -3.478103 | 0.208648  |
| 37 | 6 | 0 | 0.459949  | 3.196073  | 1.538667  |
| 38 | 6 | 0 | -0.749443 | 3.806125  | 0.804695  |
| 39 | 8 | 0 | -1.306656 | 2.723359  | 0.009106  |
| 40 | 6 | 0 | -0.481172 | 5.022434  | -0.115168 |
| 41 | 6 | 0 | 0.139197  | 6.158244  | 0.714286  |
| 42 | 6 | 0 | 0.383910  | 4.662074  | -1.324367 |
| 43 | 8 | 0 | -1.728227 | 5.458060  | -0.669305 |
| 44 | 8 | 0 | -4.569928 | -2.925934 | -0.544268 |
| 45 | 8 | 0 | -5.963620 | -2.692960 | -2.813755 |
| 46 | 1 | 0 | 1.520083  | -1.269848 | 2.627802  |
| 47 | 1 | 0 | 0.518960  | -2.256687 | 1.562858  |
| 48 | 1 | 0 | -1.319126 | -0.641494 | 1.670561  |
| 49 | 1 | 0 | -0.238354 | -1.497649 | 4.383172  |
| 50 | 1 | 0 | -1.857151 | -0.870353 | 4.140539  |
| 51 | 1 | 0 | -0.715601 | -3.537573 | 3.160890  |
| 52 | 1 | 0 | -3.777076 | -5.078048 | 3.197191  |
| 53 | 1 | 0 | -2.137012 | -5.219054 | 2.529159  |

|    |   |   |           |           |           |
|----|---|---|-----------|-----------|-----------|
| 54 | 1 | 0 | -3.470623 | -4.613797 | 1.522729  |
| 55 | 1 | 0 | -3.751593 | -1.269737 | 3.328271  |
| 56 | 1 | 0 | -4.455072 | -2.254855 | 2.032618  |
| 57 | 1 | 0 | -4.718706 | -2.702654 | 3.716003  |
| 58 | 1 | 0 | -2.423420 | 1.476875  | 2.249058  |
| 59 | 1 | 0 | -2.126099 | 1.158410  | 3.963839  |
| 60 | 1 | 0 | -1.593199 | 2.673220  | 3.263497  |
| 61 | 1 | 0 | 1.623650  | 0.772864  | 3.724972  |
| 62 | 1 | 0 | 0.740645  | 2.236829  | 4.145334  |
| 63 | 1 | 0 | 0.225874  | 0.692043  | 4.807262  |
| 64 | 1 | 0 | 3.220780  | -1.398623 | 1.036886  |
| 65 | 1 | 0 | 2.287314  | -2.242189 | -0.194299 |
| 66 | 1 | 0 | 3.859727  | 0.357610  | -0.528274 |
| 67 | 1 | 0 | 5.245441  | -1.069752 | -2.115628 |
| 68 | 1 | 0 | 4.445668  | -2.494203 | -1.467231 |
| 69 | 1 | 0 | 2.729015  | 1.829058  | -1.870811 |
| 70 | 1 | 0 | 1.906883  | 1.272503  | -3.430089 |
| 71 | 1 | 0 | -2.510074 | -1.354178 | -0.309515 |
| 72 | 1 | 0 | -5.044576 | -0.813747 | -4.550174 |
| 73 | 1 | 0 | -3.047722 | 0.625989  | -4.095171 |
| 74 | 1 | 0 | 1.799140  | -2.150456 | -2.672719 |
| 75 | 1 | 0 | 3.308370  | -1.888670 | -3.557372 |
| 76 | 1 | 0 | 1.840074  | -1.018852 | -4.032526 |
| 77 | 1 | 0 | 5.304515  | -1.941580 | 0.830083  |

|    |   |   |           |           |           |
|----|---|---|-----------|-----------|-----------|
| 78 | 1 | 0 | 6.054389  | -0.481911 | 0.191902  |
| 79 | 1 | 0 | 8.296047  | -0.720136 | -1.106769 |
| 80 | 1 | 0 | 8.845732  | -2.348176 | -1.555329 |
| 81 | 1 | 0 | 7.474313  | -1.599500 | -2.390176 |
| 82 | 1 | 0 | 8.170960  | -4.056296 | -0.022339 |
| 83 | 1 | 0 | 6.608172  | -3.900482 | 0.953093  |
| 84 | 1 | 0 | 1.405122  | 3.473349  | 1.065242  |
| 85 | 1 | 0 | 0.509164  | 3.540199  | 2.572249  |
| 86 | 1 | 0 | -1.535300 | 4.097926  | 1.512922  |
| 87 | 1 | 0 | -0.496396 | 6.415205  | 1.573416  |
| 88 | 1 | 0 | 0.233430  | 7.049635  | 0.086753  |
| 89 | 1 | 0 | 1.132002  | 5.899903  | 1.097551  |
| 90 | 1 | 0 | -0.081193 | 3.859704  | -1.902620 |
| 91 | 1 | 0 | 0.481246  | 5.543475  | -1.965286 |
| 92 | 1 | 0 | 1.388345  | 4.347756  | -1.022361 |
| 93 | 1 | 0 | -2.288856 | 5.769301  | 0.060212  |
| 94 | 1 | 0 | -5.348607 | -3.384427 | -0.903687 |
| 95 | 1 | 0 | -6.385038 | -2.543803 | -3.673741 |

---

Conformer 5b-1

---

| Center | Atomic | Atomic | Coordinates (Angstroms) |           |           |
|--------|--------|--------|-------------------------|-----------|-----------|
| Number | Number | Type   | X                       | Y         | Z         |
| 1      | 6      | 0      | -0.933596               | -0.206593 | -0.978710 |
| 2      | 6      | 0      | 0.700696                | -2.174299 | -0.940510 |
| 3      | 6      | 0      | 1.512199                | -1.368902 | 0.053890  |

|    |   |   |           |           |           |
|----|---|---|-----------|-----------|-----------|
| 4  | 6 | 0 | 1.142504  | -0.180101 | 0.599690  |
| 5  | 6 | 0 | -0.153494 | 0.401704  | 0.224990  |
| 6  | 6 | 0 | -0.037100 | -1.137597 | -1.793810 |
| 7  | 8 | 0 | 0.076300  | -1.091897 | -3.003110 |
| 8  | 6 | 0 | -2.018500 | -1.126289 | -0.340510 |
| 9  | 1 | 0 | -2.665697 | -0.497687 | 0.276790  |
| 10 | 1 | 0 | -2.645401 | -1.534187 | -1.144510 |
| 11 | 6 | 0 | -0.395107 | -3.137895 | -0.258010 |
| 12 | 6 | 0 | -1.443504 | -2.267291 | 0.520290  |
| 13 | 1 | 0 | -0.909002 | -1.814993 | 1.364690  |
| 14 | 6 | 0 | -2.610407 | -3.085087 | 1.148890  |
| 15 | 1 | 0 | -2.205910 | -3.949988 | 1.681590  |
| 16 | 1 | 0 | -3.244509 | -3.486085 | 0.347290  |
| 17 | 6 | 0 | -3.477804 | -2.268784 | 2.078690  |
| 18 | 1 | 0 | -4.262802 | -1.687381 | 1.595290  |
| 19 | 6 | 0 | -1.082610 | -3.959993 | -1.370810 |
| 20 | 1 | 0 | -1.563208 | -3.331491 | -2.127010 |
| 21 | 1 | 0 | -1.848313 | -4.609890 | -0.937810 |
| 22 | 1 | 0 | -0.373813 | -4.609995 | -1.892210 |
| 23 | 6 | 0 | 0.309789  | -4.104598 | 0.714390  |
| 24 | 1 | 0 | -0.407314 | -4.803695 | 1.154190  |
| 25 | 1 | 0 | 0.804891  | -3.570700 | 1.532890  |
| 26 | 1 | 0 | 1.058287  | -4.715301 | 0.199790  |
| 27 | 6 | 0 | -1.549292 | 0.846009  | -1.939910 |

|    |   |   |           |           |           |
|----|---|---|-----------|-----------|-----------|
| 28 | 1 | 0 | -2.117495 | 0.259211  | -2.670410 |
| 29 | 1 | 0 | -0.734391 | 1.285906  | -2.521310 |
| 30 | 6 | 0 | -2.452188 | 1.975412  | -1.384910 |
| 31 | 1 | 0 | -2.966189 | 1.618514  | -0.485510 |
| 32 | 6 | 0 | 2.449811  | 1.857494  | 1.536190  |
| 33 | 6 | 0 | 1.971906  | 0.455396  | 1.690790  |
| 34 | 6 | 0 | -1.709183 | 3.260710  | -1.007810 |
| 35 | 6 | 0 | -3.544187 | 2.347717  | -2.428610 |
| 36 | 1 | 0 | -3.980383 | 3.315718  | -2.153910 |
| 37 | 1 | 0 | -3.056186 | 2.511415  | -3.398610 |
| 38 | 8 | 0 | -0.646791 | 1.318906  | 0.866690  |
| 39 | 6 | 0 | -0.712981 | 3.778606  | -1.734610 |
| 40 | 1 | 0 | -0.313683 | 3.294804  | -2.622210 |
| 41 | 1 | 0 | -0.237178 | 4.715304  | -1.458110 |
| 42 | 8 | 0 | 2.264904  | -0.209505 | 2.676990  |
| 43 | 6 | 0 | 2.333914  | 2.566595  | 0.329490  |
| 44 | 1 | 0 | 1.855112  | 2.132296  | -0.540210 |
| 45 | 6 | 0 | 2.833219  | 3.858093  | 0.222990  |
| 46 | 6 | 0 | 3.453621  | 4.454090  | 1.335290  |
| 47 | 6 | 0 | 3.574419  | 3.757190  | 2.536390  |
| 48 | 1 | 0 | 4.057320  | 4.231488  | 3.388890  |
| 49 | 6 | 0 | 3.078214  | 2.461192  | 2.635290  |
| 50 | 1 | 0 | 3.167012  | 1.898191  | 3.557490  |
| 51 | 6 | 0 | -2.242381 | 3.976212  | 0.208290  |

|    |   |   |           |           |           |
|----|---|---|-----------|-----------|-----------|
| 52 | 1 | 0 | -3.319280 | 4.178216  | 0.112690  |
| 53 | 1 | 0 | -1.735977 | 4.933010  | 0.371290  |
| 54 | 1 | 0 | -2.106283 | 3.352511  | 1.098490  |
| 55 | 6 | 0 | -4.683391 | 1.322221  | -2.615910 |
| 56 | 1 | 0 | -4.274994 | 0.357319  | -2.940310 |
| 57 | 1 | 0 | -5.309789 | 1.681223  | -3.447710 |
| 58 | 6 | 0 | -5.577291 | 1.104924  | -1.410710 |
| 59 | 6 | 0 | -6.261487 | 2.322527  | -0.836410 |
| 60 | 1 | 0 | -6.802085 | 2.875929  | -1.616510 |
| 61 | 1 | 0 | -5.538884 | 3.023824  | -0.399910 |
| 62 | 1 | 0 | -6.975988 | 2.049529  | -0.053810 |
| 63 | 6 | 0 | -5.788596 | -0.116075 | -0.905010 |
| 64 | 1 | 0 | -5.310399 | -0.998677 | -1.323310 |
| 65 | 1 | 0 | -6.459997 | -0.280872 | -0.065310 |
| 66 | 6 | 0 | 1.825094  | -2.916104 | -1.703410 |
| 67 | 1 | 0 | 2.049396  | -2.359304 | -2.616710 |
| 68 | 1 | 0 | 1.545890  | -3.926003 | -2.004610 |
| 69 | 6 | 0 | 3.017293  | -2.939208 | -0.734610 |
| 70 | 1 | 0 | 3.091490  | -3.885608 | -0.191810 |
| 71 | 8 | 0 | 2.712497  | -1.922707 | 0.274490  |
| 72 | 6 | 0 | 4.425295  | -2.627713 | -1.288110 |
| 73 | 6 | 0 | 4.520400  | -1.246814 | -1.954310 |
| 74 | 1 | 0 | 4.223703  | -0.453213 | -1.260110 |
| 75 | 1 | 0 | 3.895700  | -1.167711 | -2.850410 |



|    |   |   |           |           |           |
|----|---|---|-----------|-----------|-----------|
| 76 | 1 | 0 | 5.559300  | -1.068918 | -2.247510 |
| 77 | 6 | 0 | 4.853890  | -3.740615 | -2.246810 |
| 78 | 1 | 0 | 4.798287  | -4.717515 | -1.754810 |
| 79 | 1 | 0 | 5.892091  | -3.575819 | -2.550510 |
| 80 | 1 | 0 | 4.228490  | -3.758513 | -3.145310 |
| 81 | 8 | 0 | 5.338094  | -2.694917 | -0.187010 |
| 82 | 1 | 0 | 5.030397  | -2.052416 | 0.474790  |
| 83 | 8 | 0 | 2.723722  | 4.541093  | -0.953310 |
| 84 | 1 | 0 | 3.121825  | 5.418392  | -0.821310 |
| 85 | 8 | 0 | 3.910426  | 5.732889  | 1.128590  |
| 86 | 1 | 0 | 4.312427  | 6.072787  | 1.942390  |
| 87 | 6 | 0 | -3.379604 | -2.173384 | 3.414290  |
| 88 | 6 | 0 | -4.329000 | -1.298580 | 4.197790  |
| 89 | 1 | 0 | -3.783197 | -0.523983 | 4.754190  |
| 90 | 1 | 0 | -4.883003 | -1.885278 | 4.944390  |
| 91 | 1 | 0 | -5.055999 | -0.800578 | 3.548790  |
| 92 | 6 | 0 | -2.351706 | -2.890188 | 4.255590  |
| 93 | 1 | 0 | -2.839709 | -3.505586 | 5.024190  |
| 94 | 1 | 0 | -1.721304 | -2.167190 | 4.790990  |
| 95 | 1 | 0 | -1.689609 | -3.537790 | 3.675890  |

---

Conformer 5b-2

| Center | Atomic | Atomic | Coordinates (Angstroms) |           |           |
|--------|--------|--------|-------------------------|-----------|-----------|
| Number | Number | Type   | X                       | Y         | Z         |
| 1      | 6      | 0      | -0.848597               | -0.267302 | -0.875203 |

|    |   |   |           |           |           |
|----|---|---|-----------|-----------|-----------|
| 2  | 6 | 0 | 0.706209  | -2.297097 | -0.736803 |
| 3  | 6 | 0 | 1.552907  | -1.474295 | 0.210997  |
| 4  | 6 | 0 | 1.226603  | -0.251496 | 0.705497  |
| 5  | 6 | 0 | -0.041699 | 0.368000  | 0.298597  |
| 6  | 6 | 0 | 0.003706  | -1.280199 | -1.640903 |
| 7  | 8 | 0 | 0.107406  | -1.309399 | -2.851603 |
| 8  | 6 | 0 | -1.966195 | -1.109905 | -0.183903 |
| 9  | 1 | 0 | -2.592497 | -0.430507 | 0.402897  |
| 10 | 1 | 0 | -2.608393 | -1.537507 | -0.965503 |
| 11 | 6 | 0 | -0.420188 | -3.179001 | 0.002897  |
| 12 | 6 | 0 | -1.434791 | -2.228504 | 0.732697  |
| 13 | 1 | 0 | -0.878893 | -1.756502 | 1.553697  |
| 14 | 6 | 0 | -2.631889 | -2.965807 | 1.391197  |
| 15 | 1 | 0 | -2.258786 | -3.841606 | 1.939597  |
| 16 | 1 | 0 | -3.301688 | -3.352309 | 0.616297  |
| 17 | 6 | 0 | -3.383592 | -2.087710 | 2.360297  |
| 18 | 1 | 0 | -2.744593 | -1.537708 | 3.054297  |
| 19 | 6 | 0 | -1.143886 | -4.037803 | -1.058003 |
| 20 | 1 | 0 | -1.609688 | -3.435504 | -1.844203 |
| 21 | 1 | 0 | -1.926384 | -4.637805 | -0.584203 |
| 22 | 1 | 0 | -0.461584 | -4.738901 | -1.547303 |
| 23 | 6 | 0 | 0.256114  | -4.111299 | 1.027597  |
| 24 | 1 | 0 | -0.484984 | -4.739801 | 1.529497  |
| 25 | 1 | 0 | 0.794913  | -3.548497 | 1.797497  |

|    |   |   |           |           |           |
|----|---|---|-----------|-----------|-----------|
| 26 | 1 | 0 | 0.961016  | -4.792997 | 0.541297  |
| 27 | 6 | 0 | -1.439200 | 0.744096  | -1.897203 |
| 28 | 1 | 0 | -2.144098 | 0.157094  | -2.498303 |
| 29 | 1 | 0 | -0.645901 | 1.011299  | -2.599803 |
| 30 | 6 | 0 | -2.146404 | 2.033294  | -1.416203 |
| 31 | 1 | 0 | -2.659103 | 1.837693  | -0.468603 |
| 32 | 6 | 0 | 2.640797  | 1.737709  | 1.602397  |
| 33 | 6 | 0 | 2.061401  | 0.380507  | 1.796297  |
| 34 | 6 | 0 | -1.212208 | 3.225297  | -1.193903 |
| 35 | 6 | 0 | -3.225205 | 2.454691  | -2.456303 |
| 36 | 1 | 0 | -3.466908 | 3.514590  | -2.313603 |
| 37 | 1 | 0 | -2.786605 | 2.386392  | -3.460903 |
| 38 | 8 | 0 | -0.495902 | 1.331999  | 0.899597  |
| 39 | 6 | 0 | -0.168708 | 3.509200  | -1.981503 |
| 40 | 1 | 0 | 0.132993  | 2.880301  | -2.815203 |
| 41 | 1 | 0 | 0.447089  | 4.387502  | -1.810703 |
| 42 | 8 | 0 | 2.270103  | -0.258793 | 2.820197  |
| 43 | 6 | 0 | 2.599395  | 2.407708  | 0.368797  |
| 44 | 1 | 0 | 2.102396  | 1.978307  | -0.493303 |
| 45 | 6 | 0 | 3.194891  | 3.654810  | 0.228097  |
| 46 | 6 | 0 | 3.834489  | 4.245312  | 1.332497  |
| 47 | 6 | 0 | 3.879091  | 3.587412  | 2.560597  |
| 48 | 1 | 0 | 4.377890  | 4.057314  | 3.406397  |
| 49 | 6 | 0 | 3.288295  | 2.335210  | 2.693997  |

|    |   |   |           |           |           |
|----|---|---|-----------|-----------|-----------|
| 50 | 1 | 0 | 3.316997  | 1.801911  | 3.637397  |
| 51 | 6 | 0 | -1.602610 | 4.139596  | -0.059003 |
| 52 | 1 | 0 | -2.645311 | 4.474593  | -0.158403 |
| 53 | 1 | 0 | -0.966013 | 5.029098  | -0.016203 |
| 54 | 1 | 0 | -1.524909 | 3.606296  | 0.894697  |
| 55 | 6 | 0 | -4.534003 | 1.633487  | -2.422303 |
| 56 | 1 | 0 | -4.306200 | 0.564588  | -2.515703 |
| 57 | 1 | 0 | -5.120404 | 1.901785  | -3.314303 |
| 58 | 6 | 0 | -5.393003 | 1.856884  | -1.193903 |
| 59 | 6 | 0 | -6.000908 | 3.229483  | -1.026603 |
| 60 | 1 | 0 | -6.590908 | 3.508281  | -1.910703 |
| 61 | 1 | 0 | -5.231810 | 4.003585  | -0.908803 |
| 62 | 1 | 0 | -6.655908 | 3.274681  | -0.151103 |
| 63 | 6 | 0 | -5.622201 | 0.881484  | -0.307503 |
| 64 | 1 | 0 | -5.194498 | -0.111015 | -0.423303 |
| 65 | 1 | 0 | -6.245401 | 1.040882  | 0.569597  |
| 66 | 6 | 0 | 1.795911  | -3.122394 | -1.464003 |
| 67 | 1 | 0 | 2.036210  | -2.624793 | -2.406803 |
| 68 | 1 | 0 | 1.476414  | -4.135495 | -1.708803 |
| 69 | 6 | 0 | 2.992711  | -3.139890 | -0.500503 |
| 70 | 1 | 0 | 3.034214  | -4.058490 | 0.091397  |
| 71 | 8 | 0 | 2.733308  | -2.060491 | 0.455197  |
| 72 | 6 | 0 | 4.407311  | -2.911086 | -1.077003 |
| 73 | 6 | 0 | 4.548807  | -1.570886 | -1.814603 |

| 74             | 1      | 0      | 4.284704                | -0.732187 | -1.161403 |
|----------------|--------|--------|-------------------------|-----------|-----------|
| 75             | 1      | 0      | 3.922507                | -1.514988 | -2.711303 |
| 76             | 1      | 0      | 5.591806                | -1.446583 | -2.120303 |
| 77             | 6      | 0      | 4.787314                | -4.087485 | -1.978603 |
| 78             | 1      | 0      | 4.699917                | -5.034585 | -1.435503 |
| 79             | 1      | 0      | 5.828314                | -3.977082 | -2.297003 |
| 80             | 1      | 0      | 4.154314                | -4.129287 | -2.871103 |
| 81             | 8      | 0      | 5.325411                | -2.954983 | 0.020897  |
| 82             | 1      | 0      | 5.048809                | -2.265284 | 0.647797  |
| 83             | 8      | 0      | 3.161989                | 4.301110  | -0.973703 |
| 84             | 1      | 0      | 3.620187                | 5.151511  | -0.862003 |
| 85             | 8      | 0      | 4.387986                | 5.478914  | 1.091097  |
| 86             | 1      | 0      | 4.794985                | 5.819915  | 1.901997  |
| 87             | 6      | 0      | -4.709892               | -1.926514 | 2.489397  |
| 88             | 6      | 0      | -5.272295               | -1.013615 | 3.553797  |
| 89             | 1      | 0      | -5.925493               | -1.565617 | 4.244497  |
| 90             | 1      | 0      | -5.889997               | -0.221517 | 3.107897  |
| 91             | 1      | 0      | -4.482496               | -0.535913 | 4.141397  |
| 92             | 6      | 0      | -5.754090               | -2.616917 | 1.645497  |
| 93             | 1      | 0      | -6.398188               | -3.249519 | 2.272297  |
| 94             | 1      | 0      | -5.331888               | -3.250415 | 0.861497  |
| 95             | 1      | 0      | -6.414892               | -1.881919 | 1.165897  |
| Conformer 7a-1 |        |        |                         |           |           |
| Center         | Atomic | Atomic | Coordinates (Angstroms) |           |           |

| Number | Number | Type | X         | Y         | Z         |
|--------|--------|------|-----------|-----------|-----------|
| 1      | 6      | 0    | 0.872400  | 0.765896  | -1.111001 |
| 2      | 6      | 0    | -0.901099 | 2.170797  | 0.133199  |
| 3      | 6      | 0    | -1.407000 | 0.846297  | 0.755299  |
| 4      | 6      | 0    | -0.889200 | -0.427203 | 0.248199  |
| 5      | 6      | 0    | 0.156500  | -0.479404 | -0.617201 |
| 6      | 6      | 0    | -3.251001 | -3.371503 | 1.048299  |
| 7      | 1      | 0    | -2.707101 | -3.779303 | 1.896499  |
| 8      | 6      | 0    | -2.718701 | -2.246803 | 0.389199  |
| 9      | 6      | 0    | -1.438400 | -1.687803 | 0.884499  |
| 10     | 6      | 0    | -4.439101 | -3.929002 | 0.618199  |
| 11     | 6      | 0    | -5.127301 | -3.383402 | -0.486901 |
| 12     | 6      | 0    | -4.601701 | -2.273602 | -1.145301 |
| 13     | 1      | 0    | -5.144301 | -1.867102 | -1.992701 |
| 14     | 6      | 0    | -3.405001 | -1.708303 | -0.707301 |
| 15     | 1      | 0    | -3.002400 | -0.843603 | -1.223701 |
| 16     | 8      | 0    | -0.820401 | -2.217403 | 1.801699  |
| 17     | 8      | 0    | -5.051801 | -5.023302 | 1.187599  |
| 18     | 1      | 0    | -4.544202 | -5.313802 | 1.960399  |
| 19     | 8      | 0    | -6.293201 | -3.937602 | -0.904401 |
| 20     | 1      | 0    | -6.491801 | -4.684302 | -0.312201 |
| 21     | 8      | 0    | -2.265800 | 0.863797  | 1.633699  |
| 22     | 8      | 0    | 0.633900  | -1.692704 | -0.958001 |
| 23     | 6      | 0    | -0.192699 | 1.878696  | -1.185901 |

|    |   |   |           |          |           |
|----|---|---|-----------|----------|-----------|
| 24 | 8 | 0 | -0.397999 | 2.498097 | -2.211501 |
| 25 | 6 | 0 | -2.114399 | 3.116897 | -0.062301 |
| 26 | 1 | 0 | -2.506199 | 3.349397 | 0.929199  |
| 27 | 1 | 0 | -1.777899 | 4.048097 | -0.520301 |
| 28 | 6 | 0 | -5.466899 | 2.854598 | -2.070801 |
| 29 | 1 | 0 | -4.985999 | 2.709298 | -3.043801 |
| 30 | 1 | 0 | -6.332999 | 3.514598 | -2.213401 |
| 31 | 1 | 0 | -5.843099 | 1.887198 | -1.717601 |
| 32 | 6 | 0 | -4.472999 | 3.471398 | -1.073101 |
| 33 | 6 | 0 | -3.247399 | 2.545597 | -0.931401 |
| 34 | 1 | 0 | -3.602400 | 1.594997 | -0.516401 |
| 35 | 1 | 0 | -2.864699 | 2.351897 | -1.938701 |
| 36 | 6 | 0 | -5.168999 | 3.736798 | 0.271699  |
| 37 | 1 | 0 | -5.491499 | 2.803698 | 0.747099  |
| 38 | 1 | 0 | -6.060499 | 4.360898 | 0.122999  |
| 39 | 1 | 0 | -4.503999 | 4.262998 | 0.962199  |
| 40 | 6 | 0 | 1.945200  | 1.247196 | -0.063001 |
| 41 | 1 | 0 | 2.529201  | 2.018296 | -0.577901 |
| 42 | 1 | 0 | 2.638800  | 0.424996 | 0.137099  |
| 43 | 6 | 0 | 0.230301  | 2.814096 | 1.084499  |
| 44 | 6 | 0 | 1.432801  | 1.818696 | 1.283299  |
| 45 | 1 | 0 | 2.241501  | 2.460696 | 1.652499  |
| 46 | 6 | 0 | 1.287700  | 0.724296 | 2.381199  |
| 47 | 6 | 0 | 2.625100  | 0.453196 | 3.071799  |

|    |   |   |          |           |           |
|----|---|---|----------|-----------|-----------|
| 48 | 1 | 0 | 3.400900 | 0.244295  | 2.312299  |
| 49 | 6 | 0 | 2.630100 | -0.770804 | 4.025899  |
| 50 | 8 | 0 | 3.946300 | -0.671005 | 4.631299  |
| 51 | 1 | 0 | 3.970400 | -1.279505 | 5.385999  |
| 52 | 6 | 0 | 2.529499 | -2.095104 | 3.262799  |
| 53 | 1 | 0 | 2.669899 | -2.935804 | 3.954499  |
| 54 | 1 | 0 | 3.314699 | -2.156805 | 2.500699  |
| 55 | 1 | 0 | 1.554599 | -2.220404 | 2.781399  |
| 56 | 6 | 0 | 1.557700 | -0.662704 | 5.114699  |
| 57 | 1 | 0 | 1.700400 | -1.448104 | 5.869299  |
| 58 | 1 | 0 | 0.554000 | -0.791504 | 4.697499  |
| 59 | 1 | 0 | 1.613600 | 0.311896  | 5.608099  |
| 60 | 8 | 0 | 2.981400 | 1.629896  | 3.792899  |
| 61 | 1 | 0 | 3.736100 | 1.360295  | 4.346099  |
| 62 | 6 | 0 | 1.119499 | -1.947704 | -2.325801 |
| 63 | 6 | 0 | 2.143800 | -0.855904 | -2.725801 |
| 64 | 1 | 0 | 0.587400 | 1.050696  | 3.152399  |
| 65 | 1 | 0 | 0.896600 | -0.210604 | 1.979799  |
| 66 | 1 | 0 | 2.285100 | -0.957204 | -3.811901 |
| 67 | 6 | 0 | 1.509800 | 0.536496  | -2.501601 |
| 68 | 1 | 0 | 0.734800 | 0.705496  | -3.253201 |
| 69 | 1 | 0 | 2.248600 | 1.321996  | -2.683801 |
| 70 | 6 | 0 | 1.703999 | -3.357604 | -2.234201 |
| 71 | 1 | 0 | 2.158299 | -3.642804 | -3.189001 |



|    |   |   |           |           |           |
|----|---|---|-----------|-----------|-----------|
| 72 | 1 | 0 | 0.909699  | -4.073204 | -2.000901 |
| 73 | 1 | 0 | 2.462099  | -3.427204 | -1.451601 |
| 74 | 6 | 0 | 3.538100  | -1.063105 | -2.090301 |
| 75 | 1 | 0 | 3.451900  | -1.124105 | -0.999401 |
| 76 | 1 | 0 | 3.928499  | -2.028605 | -2.423201 |
| 77 | 6 | 0 | -0.104901 | -1.965004 | -3.254401 |
| 78 | 1 | 0 | 0.193599  | -2.264904 | -4.264801 |
| 79 | 1 | 0 | -0.593100 | -0.988903 | -3.323201 |
| 80 | 1 | 0 | -0.841101 | -2.684603 | -2.883501 |
| 81 | 6 | 0 | 0.798001  | 4.095696  | 0.420499  |
| 82 | 1 | 0 | 1.549401  | 4.538296  | 1.084299  |
| 83 | 1 | 0 | 0.018201  | 4.845096  | 0.262199  |
| 84 | 1 | 0 | 1.273301  | 3.912996  | -0.547701 |
| 85 | 6 | 0 | -0.356799 | 3.243097  | 2.445499  |
| 86 | 1 | 0 | -1.001399 | 2.482197  | 2.888999  |
| 87 | 1 | 0 | -0.949199 | 4.157197  | 2.340599  |
| 88 | 1 | 0 | 0.461601  | 3.456596  | 3.142699  |
| 89 | 6 | 0 | 4.571900  | 0.000495  | -2.490601 |
| 90 | 1 | 0 | 4.370000  | 0.955695  | -1.991601 |
| 91 | 1 | 0 | 4.494800  | 0.186295  | -3.570901 |
| 92 | 6 | 0 | 6.036400  | -0.386305 | -2.201101 |
| 93 | 6 | 0 | 6.975100  | 0.724994  | -2.695801 |
| 94 | 1 | 0 | 6.804400  | 1.665494  | -2.158901 |
| 95 | 1 | 0 | 6.824800  | 0.901894  | -3.765801 |

|     |   |   |           |           |           |
|-----|---|---|-----------|-----------|-----------|
| 96  | 1 | 0 | 8.024500  | 0.441694  | -2.541301 |
| 97  | 6 | 0 | 6.282100  | -0.671005 | -0.711101 |
| 98  | 1 | 0 | 5.678200  | -1.515705 | -0.367001 |
| 99  | 1 | 0 | 6.045600  | 0.201195  | -0.090401 |
| 100 | 1 | 0 | 7.337400  | -0.920006 | -0.538301 |
| 101 | 8 | 0 | 6.270500  | -1.581805 | -2.968901 |
| 102 | 1 | 0 | 7.179199  | -1.870006 | -2.787001 |
| 103 | 8 | 0 | -3.969099 | 4.708298  | -1.610001 |
| 104 | 1 | 0 | -4.722998 | 5.313798  | -1.693001 |

---

Conformer 7a-2

---

| Center | Atomic | Atomic | Coordinates (Angstroms) |           |           |
|--------|--------|--------|-------------------------|-----------|-----------|
| Number | Number | Type   | X                       | Y         | Z         |
| 1      | 6      | 0      | 0.805004                | 0.888097  | -1.066502 |
| 2      | 6      | 0      | -0.942196               | 2.176097  | 0.332398  |
| 3      | 6      | 0      | -1.401796               | 0.804997  | 0.886698  |
| 4      | 6      | 0      | -0.875396               | -0.422803 | 0.287498  |
| 5      | 6      | 0      | 0.136404                | -0.401103 | -0.619702 |
| 6      | 6      | 0      | -3.174095               | -3.463903 | 0.882598  |
| 7      | 1      | 0      | -2.613095               | -3.923003 | 1.692598  |
| 8      | 6      | 0      | -2.673095               | -2.279903 | 0.307598  |
| 9      | 6      | 0      | -1.400295               | -1.733603 | 0.836598  |
| 10     | 6      | 0      | -4.352795               | -4.014804 | 0.419898  |
| 11     | 6      | 0      | -5.063795               | -3.402404 | -0.634702 |
| 12     | 6      | 0      | -4.570195               | -2.232804 | -1.209102 |

|    |   |   |           |           |           |
|----|---|---|-----------|-----------|-----------|
| 13 | 1 | 0 | -5.129895 | -1.775004 | -2.018302 |
| 14 | 6 | 0 | -3.382195 | -1.675104 | -0.738502 |
| 15 | 1 | 0 | -3.005396 | -0.763803 | -1.190202 |
| 16 | 8 | 0 | -0.768795 | -2.316503 | 1.710598  |
| 17 | 8 | 0 | -4.934595 | -5.163804 | 0.907898  |
| 18 | 1 | 0 | -4.407595 | -5.506704 | 1.645398  |
| 19 | 8 | 0 | -6.220195 | -3.950304 | -1.085002 |
| 20 | 1 | 0 | -6.394195 | -4.747004 | -0.553102 |
| 21 | 8 | 0 | -2.233396 | 0.752597  | 1.790198  |
| 22 | 8 | 0 | 0.600404  | -1.584503 | -1.068102 |
| 23 | 6 | 0 | -0.282096 | 1.978697  | -1.032102 |
| 24 | 8 | 0 | -0.537296 | 2.659497  | -2.006102 |
| 25 | 6 | 0 | -2.182597 | 3.102897  | 0.233298  |
| 26 | 1 | 0 | -2.548897 | 3.264597  | 1.248198  |
| 27 | 1 | 0 | -1.883097 | 4.067797  | -0.178202 |
| 28 | 6 | 0 | -5.585397 | 2.889696  | -1.693802 |
| 29 | 1 | 0 | -5.129997 | 2.797196  | -2.685402 |
| 30 | 1 | 0 | -6.463797 | 3.542996  | -1.781602 |
| 31 | 1 | 0 | -5.938696 | 1.901596  | -1.376602 |
| 32 | 6 | 0 | -4.572197 | 3.472896  | -0.695502 |
| 33 | 6 | 0 | -3.331496 | 2.558396  | -0.632602 |
| 34 | 1 | 0 | -3.660996 | 1.582796  | -0.256802 |
| 35 | 1 | 0 | -2.975396 | 2.422397  | -1.658802 |
| 36 | 6 | 0 | -5.234297 | 3.665896  | 0.678398  |

|    |   |   |           |           |           |
|----|---|---|-----------|-----------|-----------|
| 37 | 1 | 0 | -5.530396 | 2.707196  | 1.118998  |
| 38 | 1 | 0 | -6.138097 | 4.282596  | 0.582498  |
| 39 | 1 | 0 | -4.558197 | 4.170696  | 1.373998  |
| 40 | 6 | 0 | 1.900504  | 1.362798  | -0.047302 |
| 41 | 1 | 0 | 2.387404  | 2.214998  | -0.535402 |
| 42 | 1 | 0 | 2.672004  | 0.599298  | 0.044598  |
| 43 | 6 | 0 | 0.208803  | 2.790597  | 1.287498  |
| 44 | 6 | 0 | 1.453104  | 1.826998  | 1.360898  |
| 45 | 1 | 0 | 2.283704  | 2.459598  | 1.695198  |
| 46 | 6 | 0 | 1.389704  | 0.716698  | 2.447998  |
| 47 | 6 | 0 | 2.612904  | -0.221402 | 2.455398  |
| 48 | 1 | 0 | 2.527204  | -0.924502 | 1.618498  |
| 49 | 6 | 0 | 2.763004  | -1.057802 | 3.765298  |
| 50 | 8 | 0 | 3.301204  | -0.167502 | 4.778698  |
| 51 | 1 | 0 | 2.559304  | 0.339398  | 5.145598  |
| 52 | 6 | 0 | 3.836205  | -2.132502 | 3.571598  |
| 53 | 1 | 0 | 4.047205  | -2.625302 | 4.525498  |
| 54 | 1 | 0 | 4.759705  | -1.688002 | 3.191398  |
| 55 | 1 | 0 | 3.492705  | -2.886402 | 2.855098  |
| 56 | 6 | 0 | 1.452005  | -1.678202 | 4.248498  |
| 57 | 1 | 0 | 1.642405  | -2.325102 | 5.111798  |
| 58 | 1 | 0 | 0.974205  | -2.265203 | 3.458698  |
| 59 | 1 | 0 | 0.730404  | -0.910503 | 4.553198  |
| 60 | 8 | 0 | 3.830204  | 0.501898  | 2.253998  |

|    |   |   |           |           |           |
|----|---|---|-----------|-----------|-----------|
| 61 | 1 | 0 | 4.103404  | 0.759798  | 3.155898  |
| 62 | 6 | 0 | 1.043005  | -1.734203 | -2.467502 |
| 63 | 6 | 0 | 2.056704  | -0.611902 | -2.801002 |
| 64 | 1 | 0 | 1.337104  | 1.227798  | 3.418298  |
| 65 | 1 | 0 | 0.493904  | 0.098297  | 2.378198  |
| 66 | 1 | 0 | 2.203604  | -0.640002 | -3.890502 |
| 67 | 6 | 0 | 1.406104  | 0.754998  | -2.485902 |
| 68 | 1 | 0 | 0.611504  | 0.954097  | -3.209002 |
| 69 | 1 | 0 | 2.129904  | 1.560598  | -2.637902 |
| 70 | 6 | 0 | 1.629505  | -3.145902 | -2.504102 |
| 71 | 1 | 0 | 2.051805  | -3.353802 | -3.493002 |
| 72 | 1 | 0 | 0.843105  | -3.879503 | -2.302202 |
| 73 | 1 | 0 | 2.413705  | -3.275902 | -1.755902 |
| 74 | 6 | 0 | 3.441904  | -0.859402 | -2.159502 |
| 75 | 1 | 0 | 3.324304  | -1.048202 | -1.086302 |
| 76 | 1 | 0 | 3.859905  | -1.774702 | -2.588702 |
| 77 | 6 | 0 | -0.209295 | -1.683003 | -3.356502 |
| 78 | 1 | 0 | 0.063305  | -1.876603 | -4.399802 |
| 79 | 1 | 0 | -0.715296 | -0.714703 | -3.314602 |
| 80 | 1 | 0 | -0.922695 | -2.449003 | -3.037702 |
| 81 | 6 | 0 | 0.690403  | 4.143697  | 0.704098  |
| 82 | 1 | 0 | 1.482203  | 4.549998  | 1.343898  |
| 83 | 1 | 0 | -0.118297 | 4.878497  | 0.677698  |
| 84 | 1 | 0 | 1.089703  | 4.064098  | -0.311002 |

|     |   |   |           |           |           |
|-----|---|---|-----------|-----------|-----------|
| 85  | 6 | 0 | -0.337397 | 3.083697  | 2.699798  |
| 86  | 1 | 0 | -0.815896 | 2.216697  | 3.158198  |
| 87  | 1 | 0 | -1.069397 | 3.895997  | 2.677098  |
| 88  | 1 | 0 | 0.486203  | 3.412397  | 3.345798  |
| 89  | 6 | 0 | 4.472304  | 0.254398  | -2.387802 |
| 90  | 1 | 0 | 4.215604  | 1.150298  | -1.811802 |
| 91  | 1 | 0 | 4.468404  | 0.544698  | -3.447602 |
| 92  | 6 | 0 | 5.920204  | -0.139001 | -2.030502 |
| 93  | 6 | 0 | 6.852104  | 1.061999  | -2.253702 |
| 94  | 1 | 0 | 6.615504  | 1.885999  | -1.570502 |
| 95  | 1 | 0 | 6.767704  | 1.425899  | -3.283302 |
| 96  | 1 | 0 | 7.897504  | 0.776299  | -2.079102 |
| 97  | 6 | 0 | 6.050004  | -0.663001 | -0.591002 |
| 98  | 1 | 0 | 5.517204  | -1.611701 | -0.477302 |
| 99  | 1 | 0 | 5.648604  | 0.040999  | 0.146498  |
| 100 | 1 | 0 | 7.105704  | -0.840601 | -0.345302 |
| 101 | 8 | 0 | 6.264604  | -1.184501 | -2.961502 |
| 102 | 1 | 0 | 7.147704  | -1.506101 | -2.719602 |
| 103 | 8 | 0 | -4.097997 | 4.740096  | -1.186402 |
| 104 | 1 | 0 | -4.863197 | 5.335196  | -1.233702 |

---

Conformer 7b-2

| Center | Atomic | Atomic | Coordinates (Angstroms) |          |           |
|--------|--------|--------|-------------------------|----------|-----------|
| Number | Number | Type   | X                       | Y        | Z         |
| 1      | 6      | 0      | 0.981390                | 0.815511 | -0.598001 |

|    |   |   |           |           |           |
|----|---|---|-----------|-----------|-----------|
| 2  | 6 | 0 | -0.824818 | 1.993599  | 0.805699  |
| 3  | 6 | 0 | -1.574509 | 0.635293  | 0.858199  |
| 4  | 6 | 0 | -1.048201 | -0.502203 | 0.111299  |
| 5  | 6 | 0 | 0.111899  | -0.419295 | -0.609001 |
| 6  | 6 | 0 | -3.640681 | -3.363721 | 0.045699  |
| 7  | 1 | 0 | -3.138776 | -4.044518 | 0.728299  |
| 8  | 6 | 0 | -3.018589 | -2.137617 | -0.262301 |
| 9  | 6 | 0 | -1.705391 | -1.842908 | 0.342699  |
| 10 | 6 | 0 | -4.862978 | -3.678330 | -0.513601 |
| 11 | 6 | 0 | -5.496385 | -2.781034 | -1.400701 |
| 12 | 6 | 0 | -4.881993 | -1.569130 | -1.711601 |
| 13 | 1 | 0 | -5.384298 | -0.889333 | -2.392001 |
| 14 | 6 | 0 | -3.651295 | -1.250021 | -1.143401 |
| 15 | 1 | 0 | -3.178102 | -0.305618 | -1.388401 |
| 16 | 8 | 0 | -1.128785 | -2.675204 | 1.048799  |
| 17 | 8 | 0 | -5.563470 | -4.842535 | -0.283301 |
| 18 | 1 | 0 | -5.087466 | -5.384231 | 0.363999  |
| 19 | 8 | 0 | -6.696582 | -3.098943 | -1.946601 |
| 20 | 1 | 0 | -6.957176 | -3.968844 | -1.595601 |
| 21 | 8 | 0 | -2.595508 | 0.533586  | 1.536899  |
| 22 | 8 | 0 | 0.487706  | -1.503892 | -1.284801 |
| 23 | 6 | 0 | 0.087382  | 2.042505  | -0.416401 |
| 24 | 8 | 0 | 0.181475  | 3.008606  | -1.150901 |
| 25 | 6 | 0 | -1.854726 | 3.149691  | 0.757699  |

|    |   |   |           |           |           |
|----|---|---|-----------|-----------|-----------|
| 26 | 1 | 0 | -2.414326 | 3.152287  | 1.694699  |
| 27 | 1 | 0 | -1.301733 | 4.089995  | 0.688299  |
| 28 | 6 | 0 | -4.734035 | 4.390971  | 0.670799  |
| 29 | 1 | 0 | -5.254228 | 3.451468  | 0.883699  |
| 30 | 1 | 0 | -5.489540 | 5.167966  | 0.491599  |
| 31 | 1 | 0 | -4.170337 | 4.685375  | 1.562799  |
| 32 | 6 | 0 | -3.827134 | 4.232978  | -0.559001 |
| 33 | 6 | 0 | -2.847826 | 3.051284  | -0.413101 |
| 34 | 1 | 0 | -3.457519 | 2.148580  | -0.301701 |
| 35 | 1 | 0 | -2.307425 | 2.969788  | -1.361301 |
| 36 | 6 | 0 | -3.106043 | 5.549683  | -0.884801 |
| 37 | 1 | 0 | -2.483045 | 5.895787  | -0.052901 |
| 38 | 1 | 0 | -3.836849 | 6.342177  | -1.096101 |
| 39 | 1 | 0 | -2.468842 | 5.426887  | -1.766401 |
| 40 | 6 | 0 | 1.897290  | 0.787918  | 0.678399  |
| 41 | 1 | 0 | 2.581384  | 1.642422  | 0.601999  |
| 42 | 1 | 0 | 2.503697  | -0.115578 | 0.644999  |
| 43 | 6 | 0 | 0.163381  | 2.060106  | 2.097999  |
| 44 | 6 | 0 | 1.119090  | 0.817512  | 2.001199  |
| 45 | 1 | 0 | 0.473396  | -0.060192 | 2.002999  |
| 46 | 6 | 0 | 2.065092  | 0.607719  | 3.203099  |
| 47 | 6 | 0 | 1.596507  | -1.600784 | -2.261701 |
| 48 | 6 | 0 | 2.579599  | -0.410678 | -2.130801 |
| 49 | 1 | 0 | 2.806686  | 1.422024  | 3.245799  |



|    |   |   |          |           |           |
|----|---|---|----------|-----------|-----------|
| 50 | 6 | 0 | 2.862101 | -0.719276 | 3.253099  |
| 51 | 1 | 0 | 3.595601 | -0.739470 | 2.431599  |
| 52 | 6 | 0 | 2.058610 | -2.047581 | 3.129999  |
| 53 | 8 | 0 | 1.644211 | -2.124484 | 1.755699  |
| 54 | 1 | 0 | 0.710113 | -2.409491 | 1.680499  |
| 55 | 6 | 0 | 0.861511 | -2.097590 | 4.086499  |
| 56 | 1 | 0 | 0.120205 | -1.324395 | 3.861799  |
| 57 | 1 | 0 | 1.198710 | -1.962687 | 5.118899  |
| 58 | 1 | 0 | 0.360217 | -3.069393 | 4.012199  |
| 59 | 6 | 0 | 2.994119 | -3.238675 | 3.395499  |
| 60 | 1 | 0 | 3.847318 | -3.206869 | 2.708399  |
| 61 | 1 | 0 | 2.449325 | -4.171578 | 3.212999  |
| 62 | 1 | 0 | 3.373819 | -3.238272 | 4.420299  |
| 63 | 8 | 0 | 3.555701 | -0.777271 | 4.507299  |
| 64 | 1 | 0 | 4.005695 | 0.072732  | 4.630499  |
| 65 | 1 | 0 | 1.497491 | 0.663115  | 4.136799  |
| 66 | 1 | 0 | 3.204200 | -0.606373 | -1.256101 |
| 67 | 6 | 0 | 1.815390 | 0.896517  | -1.881801 |
| 68 | 1 | 0 | 1.160088 | 1.135213  | -2.729001 |
| 69 | 1 | 0 | 2.512184 | 1.732622  | -1.789601 |
| 70 | 6 | 0 | 2.258816 | -2.929280 | -1.885901 |
| 71 | 1 | 0 | 3.123218 | -3.128874 | -2.527801 |
| 72 | 1 | 0 | 1.549522 | -3.755085 | -2.001201 |
| 73 | 1 | 0 | 2.581816 | -2.900678 | -0.840701 |

|    |   |   |           |           |           |
|----|---|---|-----------|-----------|-----------|
| 74 | 6 | 0 | 3.526098  | -0.302271 | -3.349101 |
| 75 | 1 | 0 | 3.927105  | -1.294268 | -3.591701 |
| 76 | 1 | 0 | 2.945396  | 0.007125  | -4.227901 |
| 77 | 6 | 0 | 0.895508  | -1.690089 | -3.622601 |
| 78 | 1 | 0 | 1.602310  | -1.977584 | -4.406801 |
| 79 | 1 | 0 | 0.435901  | -0.737593 | -3.906201 |
| 80 | 1 | 0 | 0.108013  | -2.447795 | -3.576701 |
| 81 | 6 | 0 | 0.944072  | 3.392711  | 2.094799  |
| 82 | 1 | 0 | 1.677072  | 3.398116  | 2.909199  |
| 83 | 1 | 0 | 0.273066  | 4.240506  | 2.263399  |
| 84 | 1 | 0 | 1.479371  | 3.581515  | 1.159899  |
| 85 | 6 | 0 | -0.656318 | 1.998600  | 3.403199  |
| 86 | 1 | 0 | -1.180611 | 1.047196  | 3.521799  |
| 87 | 1 | 0 | -1.404924 | 2.793895  | 3.442399  |
| 88 | 1 | 0 | 0.002481  | 2.143504  | 4.265399  |
| 89 | 6 | 0 | 4.700991  | 0.688437  | -3.219001 |
| 90 | 1 | 0 | 4.321184  | 1.701335  | -3.040401 |
| 91 | 1 | 0 | 5.204991  | 0.722941  | -4.193701 |
| 92 | 6 | 0 | 5.785093  | 0.414645  | -2.155701 |
| 93 | 6 | 0 | 6.325303  | -1.021851 | -2.214301 |
| 94 | 1 | 0 | 6.736305  | -1.255048 | -3.203501 |
| 95 | 1 | 0 | 5.542308  | -1.749857 | -1.983501 |
| 96 | 1 | 0 | 7.133104  | -1.156546 | -1.483101 |
| 97 | 6 | 0 | 6.932386  | 1.423453  | -2.330501 |

|     |   |   |           |          |           |
|-----|---|---|-----------|----------|-----------|
| 98  | 1 | 0 | 6.550179  | 2.448450 | -2.280801 |
| 99  | 1 | 0 | 7.445887  | 1.288757 | -3.289301 |
| 100 | 1 | 0 | 7.678487  | 1.299958 | -1.534601 |
| 101 | 8 | 0 | 5.157891  | 0.645541 | -0.876301 |
| 102 | 1 | 0 | 5.823193  | 0.470645 | -0.191301 |
| 103 | 8 | 0 | -4.633931 | 3.849272 | -1.691301 |
| 104 | 1 | 0 | -5.279736 | 4.559567 | -1.836101 |

---

Conformer 11a-1

---

| Center | Atomic | Atomic | Coordinates (Angstroms) |           |           |
|--------|--------|--------|-------------------------|-----------|-----------|
| Number | Number | Type   | X                       | Y         | Z         |
| 1      | 6      | 0      | 0.863802                | -0.095894 | 1.059899  |
| 2      | 6      | 0      | 2.037305                | -1.697592 | -0.571801 |
| 3      | 6      | 0      | 1.128904                | -1.144993 | -1.705801 |
| 4      | 6      | 0      | 0.082102                | -0.139996 | -1.380001 |
| 5      | 6      | 0      | 0.016601                | 0.361504  | -0.107201 |
| 6      | 6      | 0      | 1.409105                | -1.499593 | 0.795799  |
| 7      | 8      | 0      | 1.467207                | -2.334993 | 1.680399  |
| 8      | 6      | 0      | 2.164600                | 0.787909  | 1.082099  |
| 9      | 1      | 0      | 2.738301                | 0.493110  | 1.969799  |
| 10     | 1      | 0      | 1.874798                | 1.834408  | 1.227899  |
| 11     | 6      | 0      | 3.413204                | -0.824789 | -0.529301 |
| 12     | 6      | 0      | 3.048501                | 0.664011  | -0.173401 |
| 13     | 1      | 0      | 2.476500                | 1.051709  | -1.027201 |
| 14     | 6      | 0      | 4.271599                | 1.610713  | -0.018101 |

|    |   |   |           |           |           |
|----|---|---|-----------|-----------|-----------|
| 15 | 1 | 0 | 4.806399  | 1.381314  | 0.908899  |
| 16 | 6 | 0 | 3.881796  | 3.066412  | -0.071101 |
| 17 | 1 | 0 | 3.372995  | 3.356311  | -0.993201 |
| 18 | 1 | 0 | 4.977099  | 1.419814  | -0.836601 |
| 19 | 6 | 0 | 4.115204  | -0.870587 | -1.902901 |
| 20 | 1 | 0 | 5.099803  | -0.396685 | -1.836401 |
| 21 | 1 | 0 | 3.541703  | -0.364088 | -2.682801 |
| 22 | 1 | 0 | 4.281806  | -1.899087 | -2.232201 |
| 23 | 6 | 0 | 4.379005  | -1.427887 | 0.515399  |
| 24 | 1 | 0 | 3.940505  | -1.516088 | 1.513399  |
| 25 | 1 | 0 | 5.277903  | -0.808085 | 0.592999  |
| 26 | 1 | 0 | 4.708207  | -2.425886 | 0.213399  |
| 27 | 6 | 0 | 0.153602  | 0.019405  | 2.435999  |
| 28 | 1 | 0 | 0.933702  | -0.152794 | 3.184999  |
| 29 | 1 | 0 | -0.176200 | 1.054204  | 2.569399  |
| 30 | 6 | 0 | -1.023096 | -0.939998 | 2.783299  |
| 31 | 1 | 0 | -0.652694 | -1.959797 | 2.637799  |
| 32 | 6 | 0 | -1.301797 | -0.774198 | 4.281399  |
| 33 | 6 | 0 | -2.277997 | -0.785100 | 1.899199  |
| 34 | 1 | 0 | -2.698199 | 0.224299  | 1.992099  |
| 35 | 1 | 0 | -1.986096 | -0.902300 | 0.849299  |
| 36 | 6 | 0 | -2.028499 | 0.232200  | 4.778699  |
| 37 | 1 | 0 | -2.505600 | 0.974599  | 4.143499  |
| 38 | 1 | 0 | -2.181199 | 0.348300  | 5.848999  |

|    |   |   |           |           |           |
|----|---|---|-----------|-----------|-----------|
| 39 | 6 | 0 | -0.655194 | -1.802097 | 5.177299  |
| 40 | 1 | 0 | 0.421306  | -1.883395 | 4.975599  |
| 41 | 1 | 0 | -1.076792 | -2.799198 | 4.989699  |
| 42 | 1 | 0 | -0.791895 | -1.567097 | 6.237599  |
| 43 | 6 | 0 | -3.373794 | -1.823203 | 2.218799  |
| 44 | 1 | 0 | -3.660895 | -1.728803 | 3.271199  |
| 45 | 1 | 0 | -2.942592 | -2.829202 | 2.094499  |
| 46 | 6 | 0 | -4.607095 | -1.698805 | 1.346899  |
| 47 | 6 | 0 | -4.449394 | -2.028905 | -0.118401 |
| 48 | 1 | 0 | -5.403894 | -1.967007 | -0.650001 |
| 49 | 1 | 0 | -4.049292 | -3.043304 | -0.252101 |
| 50 | 1 | 0 | -3.745695 | -1.349703 | -0.617001 |
| 51 | 6 | 0 | -5.783695 | -1.320707 | 1.858399  |
| 52 | 1 | 0 | -5.900296 | -1.091608 | 2.915199  |
| 53 | 1 | 0 | -6.674596 | -1.230309 | 1.241199  |
| 54 | 6 | 0 | 2.279108  | -3.212591 | -0.840001 |
| 55 | 1 | 0 | 2.808009  | -3.316990 | -1.786201 |
| 56 | 1 | 0 | 2.928809  | -3.594290 | -0.046801 |
| 57 | 6 | 0 | -0.831199 | 0.375903  | -2.436601 |
| 58 | 6 | 0 | -1.692001 | 1.499401  | -1.993501 |
| 59 | 6 | 0 | -1.627402 | 1.963201  | -0.682001 |
| 60 | 8 | 0 | -0.782201 | 1.389603  | 0.241999  |
| 61 | 6 | 0 | -2.582402 | 2.120099  | -2.886401 |
| 62 | 1 | 0 | -2.635602 | 1.758199  | -3.907101 |

|    |   |   |           |           |           |
|----|---|---|-----------|-----------|-----------|
| 63 | 6 | 0 | -3.377005 | 3.172397  | -2.469101 |
| 64 | 6 | 0 | -3.288606 | 3.621198  | -1.128001 |
| 65 | 6 | 0 | -2.418604 | 3.022799  | -0.229501 |
| 66 | 1 | 0 | -2.343205 | 3.355900  | 0.801599  |
| 67 | 8 | 0 | -4.238306 | 3.774696  | -3.332601 |
| 68 | 1 | 0 | -4.710507 | 4.472995  | -2.847701 |
| 69 | 8 | 0 | -4.119008 | 4.666196  | -0.820501 |
| 70 | 1 | 0 | -4.032508 | 4.900096  | 0.116099  |
| 71 | 8 | 0 | -0.901398 | -0.064998 | -3.575501 |
| 72 | 8 | 0 | 1.330005  | -1.514493 | -2.848701 |
| 73 | 6 | 0 | 1.013910  | -4.037994 | -0.843101 |
| 74 | 1 | 0 | 0.536510  | -4.132495 | 0.130899  |
| 75 | 6 | 0 | 0.441811  | -4.675495 | -1.877301 |
| 76 | 6 | 0 | 0.951311  | -4.676094 | -3.296801 |
| 77 | 1 | 0 | 0.182811  | -4.282495 | -3.975101 |
| 78 | 1 | 0 | 1.169313  | -5.701993 | -3.626601 |
| 79 | 1 | 0 | 1.843510  | -4.065392 | -3.436701 |
| 80 | 6 | 0 | -0.820387 | -5.480497 | -1.668901 |
| 81 | 1 | 0 | -1.636888 | -5.101299 | -2.299501 |
| 82 | 1 | 0 | -1.154687 | -5.457498 | -0.626501 |
| 83 | 1 | 0 | -0.671785 | -6.531597 | -1.954701 |
| 84 | 6 | 0 | 4.092194  | 4.030813  | 0.839299  |
| 85 | 6 | 0 | 3.641791  | 5.448912  | 0.575899  |
| 86 | 1 | 0 | 4.493689  | 6.143313  | 0.591199  |

| 87              | 1      | 0      | 2.946990                | 5.795210  | 1.354099  |
|-----------------|--------|--------|-------------------------|-----------|-----------|
| 88              | 1      | 0      | 3.143491                | 5.547211  | -0.393601 |
| 89              | 6      | 0      | 4.782794                | 3.834714  | 2.167299  |
| 90              | 1      | 0      | 4.130993                | 4.153313  | 2.992599  |
| 91              | 1      | 0      | 5.685593                | 4.458116  | 2.229099  |
| 92              | 1      | 0      | 5.079496                | 2.800515  | 2.355399  |
| Conformer 11a-2 |        |        |                         |           |           |
| Center          | Atomic | Atomic | Coordinates (Angstroms) |           |           |
| Number          | Number | Type   | X                       | Y         | Z         |
| 1               | 6      | 0      | 0.581700                | -0.491799 | 1.339202  |
| 2               | 6      | 0      | 2.092304                | -1.661393 | -0.379398 |
| 3               | 6      | 0      | 1.453001                | -0.776396 | -1.486298 |
| 4               | 6      | 0      | 0.365397                | 0.172200  | -1.126798 |
| 5               | 6      | 0      | 0.021697                | 0.318499  | 0.190602  |
| 6               | 6      | 0      | 1.174704                | -1.802797 | 0.822002  |
| 7               | 8      | 0      | 1.034808                | -2.847697 | 1.432302  |
| 8               | 6      | 0      | 1.842697                | 0.274606  | 1.886202  |
| 9               | 1      | 0      | 2.204999                | -0.281593 | 2.759802  |
| 10              | 1      | 0      | 1.514793                | 1.255604  | 2.246702  |
| 11              | 6      | 0      | 3.419501                | -0.906089 | 0.191802  |
| 12              | 6      | 0      | 2.979996                | 0.447810  | 0.862702  |
| 13              | 1      | 0      | 2.607394                | 1.090608  | 0.055602  |
| 14              | 6      | 0      | 4.145793                | 1.243714  | 1.521402  |
| 15              | 1      | 0      | 4.508195                | 0.695815  | 2.400302  |

|    |   |   |           |           |           |
|----|---|---|-----------|-----------|-----------|
| 16 | 6 | 0 | 3.755988  | 2.637812  | 1.957102  |
| 17 | 1 | 0 | 3.323188  | 2.714511  | 2.955102  |
| 18 | 1 | 0 | 4.985493  | 1.293817  | 0.823402  |
| 19 | 6 | 0 | 4.403100  | -0.613585 | -0.961598 |
| 20 | 1 | 0 | 5.352399  | -0.246382 | -0.558498 |
| 21 | 1 | 0 | 4.015197  | 0.128513  | -1.663698 |
| 22 | 1 | 0 | 4.630703  | -1.516784 | -1.532798 |
| 23 | 6 | 0 | 4.139804  | -1.826286 | 1.203402  |
| 24 | 1 | 0 | 3.498806  | -2.156888 | 2.026102  |
| 25 | 1 | 0 | 5.000902  | -1.306183 | 1.633902  |
| 26 | 1 | 0 | 4.525608  | -2.721985 | 0.709402  |
| 27 | 6 | 0 | -0.422700 | -0.711102 | 2.503102  |
| 28 | 1 | 0 | 0.166402  | -1.132800 | 3.324102  |
| 29 | 1 | 0 | -0.773103 | 0.266896  | 2.847202  |
| 30 | 6 | 0 | -1.650196 | -1.648607 | 2.296002  |
| 31 | 1 | 0 | -1.259293 | -2.606905 | 1.938602  |
| 32 | 6 | 0 | -2.252095 | -1.900809 | 3.682602  |
| 33 | 6 | 0 | -2.673198 | -1.158910 | 1.251202  |
| 34 | 1 | 0 | -3.106201 | -0.196112 | 1.550802  |
| 35 | 1 | 0 | -2.150199 | -0.980009 | 0.305402  |
| 36 | 6 | 0 | -3.102698 | -1.054012 | 4.272602  |
| 37 | 1 | 0 | -3.458102 | -0.150913 | 3.782902  |
| 38 | 1 | 0 | -3.485198 | -1.238713 | 5.273502  |
| 39 | 6 | 0 | -1.779591 | -3.156707 | 4.373202  |



|    |   |   |           |           |           |
|----|---|---|-----------|-----------|-----------|
| 40 | 1 | 0 | -0.682991 | -3.210603 | 4.394802  |
| 41 | 1 | 0 | -2.117988 | -4.048708 | 3.828502  |
| 42 | 1 | 0 | -2.149291 | -3.223109 | 5.401402  |
| 43 | 6 | 0 | -3.809994 | -2.170514 | 0.995402  |
| 44 | 1 | 0 | -4.322294 | -2.381016 | 1.939902  |
| 45 | 1 | 0 | -3.358991 | -3.117613 | 0.659202  |
| 46 | 6 | 0 | -4.820896 | -1.708518 | -0.034598 |
| 47 | 6 | 0 | -4.336697 | -1.564616 | -1.457898 |
| 48 | 1 | 0 | -5.153798 | -1.299519 | -2.135698 |
| 49 | 1 | 0 | -3.884893 | -2.499715 | -1.816398 |
| 50 | 1 | 0 | -3.563299 | -0.791014 | -1.550798 |
| 51 | 6 | 0 | -6.088797 | -1.450323 | 0.304402  |
| 52 | 1 | 0 | -6.440897 | -1.561724 | 1.327402  |
| 53 | 1 | 0 | -6.822998 | -1.122925 | -0.428198 |
| 54 | 6 | 0 | 2.397509  | -3.060292 | -0.991198 |
| 55 | 1 | 0 | 3.127508  | -2.939190 | -1.790498 |
| 56 | 1 | 0 | 2.853211  | -3.675691 | -0.209898 |
| 57 | 6 | 0 | -0.280606 | 1.017798  | -2.167798 |
| 58 | 6 | 0 | -1.201909 | 2.044995  | -1.623798 |
| 59 | 6 | 0 | -1.427310 | 2.135594  | -0.252398 |
| 60 | 8 | 0 | -0.822307 | 1.271596  | 0.633502  |
| 61 | 6 | 0 | -1.856513 | 2.949892  | -2.477098 |
| 62 | 1 | 0 | -1.684212 | 2.878793  | -3.545298 |
| 63 | 6 | 0 | -2.705716 | 3.912789  | -1.962598 |

|    |   |   |           |           |           |
|----|---|---|-----------|-----------|-----------|
| 64 | 6 | 0 | -2.914416 | 3.979289  | -0.562598 |
| 65 | 6 | 0 | -2.281113 | 3.095691  | 0.297802  |
| 66 | 1 | 0 | -2.434213 | 3.135090  | 1.372402  |
| 67 | 8 | 0 | -3.338519 | 4.790287  | -2.786898 |
| 68 | 1 | 0 | -3.893621 | 5.370685  | -2.238398 |
| 69 | 8 | 0 | -3.773220 | 4.967786  | -0.160698 |
| 70 | 1 | 0 | -3.895720 | 4.936785  | 0.800302  |
| 71 | 8 | 0 | -0.099305 | 0.903399  | -3.372198 |
| 72 | 8 | 0 | 1.898601  | -0.842494 | -2.617898 |
| 73 | 6 | 0 | 1.171811  | -3.784897 | -1.496098 |
| 74 | 1 | 0 | 0.486812  | -4.108499 | -0.714098 |
| 75 | 6 | 0 | 0.855512  | -4.097298 | -2.763098 |
| 76 | 6 | 0 | 1.674611  | -3.751595 | -3.981398 |
| 77 | 1 | 0 | 1.066309  | -3.184497 | -4.698398 |
| 78 | 1 | 0 | 2.001014  | -4.665694 | -4.497998 |
| 79 | 1 | 0 | 2.551009  | -3.143992 | -3.754998 |
| 80 | 6 | 0 | -0.412485 | -4.863302 | -3.062398 |
| 81 | 1 | 0 | -1.072487 | -4.286805 | -3.725798 |
| 82 | 1 | 0 | -0.970184 | -5.105804 | -2.151998 |
| 83 | 1 | 0 | -0.192281 | -5.804102 | -3.586898 |
| 84 | 6 | 0 | 3.882484  | 3.777213  | 1.257602  |
| 85 | 6 | 0 | 3.443580  | 5.098211  | 1.843702  |
| 86 | 1 | 0 | 4.283077  | 5.805814  | 1.893702  |
| 87 | 1 | 0 | 3.036680  | 4.983410  | 2.853502  |

|    |   |   |          |          |           |
|----|---|---|----------|----------|-----------|
| 88 | 1 | 0 | 2.675378 | 5.573509 | 1.217602  |
| 89 | 6 | 0 | 4.456284 | 3.868815 | -0.135398 |
| 90 | 1 | 0 | 3.717283 | 4.290212 | -0.830598 |
| 91 | 1 | 0 | 4.775687 | 2.904616 | -0.537498 |
| 92 | 1 | 0 | 5.320482 | 4.547318 | -0.155298 |

---

Conformer 11a-3

---

| Center | Atomic | Atomic | Coordinates (Angstroms) |           |           |
|--------|--------|--------|-------------------------|-----------|-----------|
| Number | Number | Type   | X                       | Y         | Z         |
| 1      | 6      | 0      | -0.381293               | -0.518397 | -1.288300 |
| 2      | 6      | 0      | -1.841189               | -1.393804 | 0.632800  |
| 3      | 6      | 0      | -1.192094               | -0.326201 | 1.558000  |
| 4      | 6      | 0      | -0.096498               | 0.531004  | 1.031000  |
| 5      | 6      | 0      | 0.223203                | 0.453906  | -0.297800 |
| 6      | 6      | 0      | -0.948688               | -1.729900 | -0.546600 |
| 7      | 8      | 0      | -0.807383               | -2.861799 | -0.973200 |
| 8      | 6      | 0      | -1.655796               | 0.169897  | -1.899500 |
| 9      | 1      | 0      | -2.036593               | -0.493204 | -2.685900 |
| 10     | 1      | 0      | -1.333700               | 1.092299  | -2.397700 |
| 11     | 6      | 0      | -3.193492               | -0.766209 | -0.034000 |
| 12     | 6      | 0      | -2.784598               | 0.488992  | -0.894100 |
| 13     | 1      | 0      | -2.403201               | 1.240894  | -0.190300 |
| 14     | 6      | 0      | -3.924401               | 1.186487  | -1.692900 |
| 15     | 1      | 0      | -3.421404               | 1.862690  | -2.402900 |
| 16     | 6      | 0      | -4.889204               | 2.022683  | -0.890300 |

|    |   |   |           |           |           |
|----|---|---|-----------|-----------|-----------|
| 17 | 1 | 0 | -4.424107 | 2.607785  | -0.094800 |
| 18 | 1 | 0 | -4.448397 | 0.457385  | -2.318800 |
| 19 | 6 | 0 | -4.185694 | -0.358114 | 1.072500  |
| 20 | 1 | 0 | -5.104395 | 0.021282  | 0.618800  |
| 21 | 1 | 0 | -3.784597 | 0.416188  | 1.729800  |
| 22 | 1 | 0 | -4.454790 | -1.214915 | 1.696400  |
| 23 | 6 | 0 | -3.883487 | -1.837013 | -0.908900 |
| 24 | 1 | 0 | -3.257786 | -2.206810 | -1.726400 |
| 25 | 1 | 0 | -4.801489 | -1.428917 | -1.343200 |
| 26 | 1 | 0 | -4.179083 | -2.701414 | -0.308800 |
| 27 | 6 | 0 | 0.576409  | -0.916193 | -2.444600 |
| 28 | 1 | 0 | -0.045289 | -1.446796 | -3.173700 |
| 29 | 1 | 0 | 0.915505  | -0.001391 | -2.940100 |
| 30 | 6 | 0 | 1.807913  | -1.826187 | -2.157100 |
| 31 | 1 | 0 | 1.422017  | -2.741289 | -1.697200 |
| 32 | 6 | 0 | 2.396014  | -2.221285 | -3.516500 |
| 33 | 6 | 0 | 2.846910  | -1.234183 | -1.182900 |
| 34 | 1 | 0 | 3.275206  | -0.307581 | -1.584900 |
| 35 | 1 | 0 | 2.339709  | -0.961185 | -0.250600 |
| 36 | 6 | 0 | 3.198611  | -1.417781 | -4.222700 |
| 37 | 1 | 0 | 3.518507  | -0.445680 | -3.855400 |
| 38 | 1 | 0 | 3.575112  | -1.707680 | -5.200700 |
| 39 | 6 | 0 | 1.969520  | -3.570887 | -4.039900 |
| 40 | 1 | 0 | 0.875421  | -3.666992 | -4.044200 |

|    |   |   |           |           |           |
|----|---|---|-----------|-----------|-----------|
| 41 | 1 | 0 | 2.344024  | -4.374785 | -3.391500 |
| 42 | 1 | 0 | 2.335821  | -3.751985 | -5.055500 |
| 43 | 6 | 0 | 3.988514  | -2.216278 | -0.846400 |
| 44 | 1 | 0 | 4.485016  | -2.519176 | -1.774100 |
| 45 | 1 | 0 | 3.544618  | -3.124880 | -0.409900 |
| 46 | 6 | 0 | 5.015712  | -1.653273 | 0.114800  |
| 47 | 6 | 0 | 4.557211  | -1.376275 | 1.527000  |
| 48 | 1 | 0 | 5.382909  | -1.033572 | 2.158100  |
| 49 | 1 | 0 | 4.128315  | -2.277977 | 1.985300  |
| 50 | 1 | 0 | 3.772807  | -0.608879 | 1.559400  |
| 51 | 6 | 0 | 6.275111  | -1.421768 | -0.271600 |
| 52 | 1 | 0 | 6.609712  | -1.629366 | -1.285500 |
| 53 | 1 | 0 | 7.019709  | -1.020664 | 0.412200  |
| 54 | 6 | 0 | -2.109484 | -2.666505 | 1.489800  |
| 55 | 1 | 0 | -2.820185 | -2.411508 | 2.274400  |
| 56 | 1 | 0 | -2.574580 | -3.416707 | 0.843600  |
| 57 | 6 | 0 | 0.592498  | 1.513907  | 1.911600  |
| 58 | 6 | 0 | 1.531194  | 2.411311  | 1.194900  |
| 59 | 6 | 0 | 1.729295  | 2.274712  | -0.176900 |
| 60 | 8 | 0 | 1.077699  | 1.302409  | -0.903500 |
| 61 | 6 | 0 | 2.234690  | 3.415415  | 1.882100  |
| 62 | 1 | 0 | 2.083189  | 3.521614  | 2.950500  |
| 63 | 6 | 0 | 3.105786  | 4.251318  | 1.207100  |
| 64 | 6 | 0 | 3.286487  | 4.086319  | -0.188700 |

|    |   |   |           |           |           |
|----|---|---|-----------|-----------|-----------|
| 65 | 6 | 0 | 2.603291  | 3.102516  | -0.886900 |
| 66 | 1 | 0 | 2.735392  | 2.964117  | -1.956200 |
| 67 | 8 | 0 | 3.786682  | 5.223921  | 1.870600  |
| 68 | 1 | 0 | 4.348179  | 5.689424  | 1.227400  |
| 69 | 8 | 0 | 4.171083  | 4.964223  | -0.756500 |
| 70 | 1 | 0 | 4.272884  | 4.775524  | -1.701800 |
| 71 | 8 | 0 | 0.434298  | 1.598607  | 3.121600  |
| 72 | 8 | 0 | -1.627895 | -0.184703 | 2.686400  |
| 73 | 6 | 0 | -0.857781 | -3.272399 | 2.080000  |
| 74 | 1 | 0 | -0.187579 | -3.720796 | 1.348300  |
| 75 | 6 | 0 | -0.501181 | -3.344598 | 3.372600  |
| 76 | 6 | 0 | -1.291583 | -2.793501 | 4.532900  |
| 77 | 1 | 0 | -0.692386 | -2.055698 | 5.082600  |
| 78 | 1 | 0 | -1.539179 | -3.594202 | 5.244400  |
| 79 | 1 | 0 | -2.213385 | -2.295205 | 4.232100  |
| 80 | 6 | 0 | 0.790822  | -4.022592 | 3.767000  |
| 81 | 1 | 0 | 1.452319  | -3.327189 | 4.302500  |
| 82 | 1 | 0 | 1.333124  | -4.409889 | 2.898200  |
| 83 | 1 | 0 | 0.604626  | -4.861693 | 4.452400  |
| 84 | 6 | 0 | -6.210205 | 2.177577  | -1.072100 |
| 85 | 6 | 0 | -7.002309 | 3.119674  | -0.196100 |
| 86 | 1 | 0 | -7.808207 | 2.588270  | 0.329500  |
| 87 | 1 | 0 | -7.487013 | 3.903872  | -0.794800 |
| 88 | 1 | 0 | -6.372511 | 3.606776  | 0.554700  |

|    |   |   |           |          |           |
|----|---|---|-----------|----------|-----------|
| 89 | 6 | 0 | -7.026202 | 1.473474 | -2.129000 |
| 90 | 1 | 0 | -7.462205 | 2.200372 | -2.828700 |
| 91 | 1 | 0 | -7.871400 | 0.938370 | -1.674400 |
| 92 | 1 | 0 | -6.450599 | 0.754776 | -2.717600 |

---

Conformer 11b-1

---

| Center | Atomic | Atomic | Coordinates (Angstroms) |           |           |
|--------|--------|--------|-------------------------|-----------|-----------|
| Number | Number | Type   | X                       | Y         | Z         |
| 1      | 6      | 0      | 0.356099                | -0.380097 | -1.267707 |
| 2      | 6      | 0      | 1.092693                | -2.198499 | 0.390693  |
| 3      | 6      | 0      | 0.208396                | -1.512796 | 1.471293  |
| 4      | 6      | 0      | -0.502800               | -0.249694 | 1.140693  |
| 5      | 6      | 0      | -0.466399               | 0.214706  | -0.146407 |
| 6      | 6      | 0      | 1.500097                | -1.219201 | -0.693007 |
| 7      | 8      | 0      | 2.614997                | -1.193104 | -1.183907 |
| 8      | 6      | 0      | -0.533904               | -1.443094 | -2.005707 |
| 9      | 1      | 0      | 0.045095                | -1.817096 | -2.859907 |
| 10     | 1      | 0      | -1.410702               | -0.928991 | -2.414207 |
| 11     | 6      | 0      | 0.207690                | -3.329796 | -0.378907 |
| 12     | 6      | 0      | -0.986208               | -2.618592 | -1.118007 |
| 13     | 1      | 0      | -1.638807               | -2.212090 | -0.335607 |
| 14     | 6      | 0      | -1.885811               | -3.576390 | -1.953607 |
| 15     | 1      | 0      | -1.318512               | -3.944991 | -2.817607 |
| 16     | 6      | 0      | -3.154009               | -2.927785 | -2.459307 |
| 17     | 1      | 0      | -3.065907               | -2.398986 | -3.409007 |

|    |   |   |           |           |           |
|----|---|---|-----------|-----------|-----------|
| 18 | 1 | 0 | -2.133114 | -4.454389 | -1.351407 |
| 19 | 6 | 0 | -0.346614 | -4.352895 | 0.635393  |
| 20 | 1 | 0 | -0.818916 | -5.186493 | 0.105593  |
| 21 | 1 | 0 | -1.081412 | -3.912692 | 1.313593  |
| 22 | 1 | 0 | 0.451285  | -4.780197 | 1.247793  |
| 23 | 6 | 0 | 1.107787  | -4.094099 | -1.376807 |
| 24 | 1 | 0 | 1.607089  | -3.441501 | -2.098707 |
| 25 | 1 | 0 | 0.514685  | -4.824997 | -1.935407 |
| 26 | 1 | 0 | 1.885285  | -4.655302 | -0.851307 |
| 27 | 6 | 0 | 0.884103  | 0.667301  | -2.278507 |
| 28 | 1 | 0 | 1.394101  | 0.089700  | -3.055307 |
| 29 | 1 | 0 | 0.030404  | 1.151704  | -2.762707 |
| 30 | 6 | 0 | 1.889106  | 1.725698  | -1.731207 |
| 31 | 1 | 0 | 2.472705  | 1.253496  | -0.936507 |
| 32 | 6 | 0 | 1.230110  | 2.959900  | -1.124607 |
| 33 | 6 | 0 | 2.896407  | 2.099095  | -2.847807 |
| 34 | 1 | 0 | 3.294304  | 1.167294  | -3.266607 |
| 35 | 1 | 0 | 2.374909  | 2.603297  | -3.673007 |
| 36 | 6 | 0 | 1.387411  | 3.255300  | 0.171593  |
| 37 | 1 | 0 | 1.979509  | 2.628698  | 0.833393  |
| 38 | 1 | 0 | 0.934614  | 4.138201  | 0.617193  |
| 39 | 6 | 0 | 0.436513  | 3.869103  | -2.035007 |
| 40 | 1 | 0 | -0.347489 | 3.325005  | -2.577307 |
| 41 | 1 | 0 | 1.076615  | 4.332901  | -2.796807 |



|    |   |   |           |           |           |
|----|---|---|-----------|-----------|-----------|
| 42 | 1 | 0 | -0.040784 | 4.673704  | -1.467307 |
| 43 | 6 | 0 | 4.070710  | 2.985491  | -2.383507 |
| 44 | 1 | 0 | 3.687713  | 3.929892  | -1.979907 |
| 45 | 1 | 0 | 4.664811  | 3.241489  | -3.274507 |
| 46 | 6 | 0 | 4.987308  | 2.337988  | -1.362607 |
| 47 | 6 | 0 | 5.657404  | 1.045886  | -1.768007 |
| 48 | 1 | 0 | 6.403103  | 0.736083  | -1.029307 |
| 49 | 1 | 0 | 6.160904  | 1.147884  | -2.739507 |
| 50 | 1 | 0 | 4.929801  | 0.230488  | -1.868507 |
| 51 | 6 | 0 | 5.206110  | 2.895687  | -0.166407 |
| 52 | 1 | 0 | 4.716813  | 3.819189  | 0.132293  |
| 53 | 1 | 0 | 5.883709  | 2.448085  | 0.557393  |
| 54 | 6 | 0 | 2.354992  | -2.776103 | 1.096393  |
| 55 | 1 | 0 | 2.038589  | -3.541502 | 1.803693  |
| 56 | 1 | 0 | 2.974790  | -3.256605 | 0.333693  |
| 57 | 6 | 0 | -1.321998 | 0.452009  | 2.165193  |
| 58 | 6 | 0 | -2.150394 | 1.554711  | 1.620693  |
| 59 | 6 | 0 | -2.080293 | 1.889211  | 0.270593  |
| 60 | 8 | 0 | -1.235795 | 1.226808  | -0.591407 |
| 61 | 6 | 0 | -3.024692 | 2.275714  | 2.451693  |
| 62 | 1 | 0 | -3.076293 | 2.017614  | 3.503693  |
| 63 | 6 | 0 | -3.804289 | 3.295617  | 1.936893  |
| 64 | 6 | 0 | -3.713388 | 3.610416  | 0.558893  |
| 65 | 6 | 0 | -2.855390 | 2.914414  | -0.278707 |

|    |   |   |           |           |           |
|----|---|---|-----------|-----------|-----------|
| 66 | 1 | 0 | -2.773389 | 3.150413  | -1.335607 |
| 67 | 8 | 0 | -4.653086 | 3.993120  | 2.740093  |
| 68 | 1 | 0 | -5.099684 | 4.662321  | 2.194093  |
| 69 | 8 | 0 | -4.527784 | 4.634919  | 0.151793  |
| 70 | 1 | 0 | -4.407884 | 4.801919  | -0.795407 |
| 71 | 8 | 0 | -1.335199 | 0.176909  | 3.357193  |
| 72 | 8 | 0 | 0.075594  | -2.062096 | 2.550193  |
| 73 | 6 | 0 | 3.194795  | -1.727606 | 1.787193  |
| 74 | 1 | 0 | 3.697697  | -1.037208 | 1.112293  |
| 75 | 6 | 0 | 3.408095  | -1.569407 | 3.103493  |
| 76 | 6 | 0 | 2.813293  | -2.420605 | 4.197093  |
| 77 | 1 | 0 | 2.213795  | -1.799803 | 4.875793  |
| 78 | 1 | 0 | 3.607891  | -2.877707 | 4.804093  |
| 79 | 1 | 0 | 2.159490  | -3.210203 | 3.825493  |
| 80 | 6 | 0 | 4.308899  | -0.460810 | 3.597693  |
| 81 | 1 | 0 | 3.767301  | 0.210292  | 4.278993  |
| 82 | 1 | 0 | 4.709201  | 0.140189  | 2.774793  |
| 83 | 1 | 0 | 5.156398  | -0.864413 | 4.169993  |
| 84 | 6 | 0 | -4.362309 | -2.931281 | -1.873207 |
| 85 | 6 | 0 | -5.537307 | -2.234278 | -2.517307 |
| 86 | 1 | 0 | -5.951704 | -1.461576 | -1.854507 |
| 87 | 1 | 0 | -6.354709 | -2.941575 | -2.716107 |
| 88 | 1 | 0 | -5.262705 | -1.758978 | -3.464407 |
| 89 | 6 | 0 | -4.676011 | -3.604780 | -0.559407 |

| 90              | 1      | 0      | -5.032809               | -2.869879 | 0.175193  |
|-----------------|--------|--------|-------------------------|-----------|-----------|
| 91              | 1      | 0      | -3.818813               | -4.120583 | -0.120507 |
| 92              | 1      | 0      | -5.486014               | -4.337178 | -0.682007 |
| Conformer 11b-2 |        |        |                         |           |           |
| Center          | Atomic | Atomic | Coordinates (Angstroms) |           |           |
| Number          | Number | Type   | X                       | Y         | Z         |
| 1               | 6      | 0      | -0.191299               | 0.636495  | -0.983394 |
| 2               | 6      | 0      | -1.393509               | 1.851586  | 0.935406  |
| 3               | 6      | 0      | -0.577502               | 0.986892  | 1.938606  |
| 4               | 6      | 0      | 0.346706                | -0.056601 | 1.421406  |
| 5               | 6      | 0      | 0.551106                | -0.152300 | 0.071506  |
| 6               | 6      | 0      | -1.507003               | 1.173285  | -0.415294 |
| 7               | 8      | 0      | -2.528104               | 1.180777  | -1.080294 |
| 8               | 6      | 0      | 0.624891                | 1.945201  | -1.274494 |
| 9               | 1      | 0      | 0.109087                | 2.475197  | -2.085594 |
| 10              | 1      | 0      | 1.613293                | 1.667208  | -1.657094 |
| 11              | 6      | 0      | -0.580219               | 3.233292  | 0.640006  |
| 12              | 6      | 0      | 0.786084                | 2.877602  | -0.057394 |
| 13              | 1      | 0      | 1.383888                | 2.345306  | 0.694706  |
| 14              | 6      | 0      | 1.631575                | 4.112008  | -0.479494 |
| 15              | 1      | 0      | 1.167971                | 4.604805  | -1.339894 |
| 16              | 6      | 0      | 3.067277                | 3.754919  | -0.769994 |
| 17              | 1      | 0      | 3.590181                | 3.296823  | 0.072506  |
| 18              | 1      | 0      | 1.624369                | 4.845008  | 0.337106  |

|    |   |   |           |           |           |
|----|---|---|-----------|-----------|-----------|
| 19 | 6 | 0 | -0.306924 | 3.980394  | 1.962206  |
| 20 | 1 | 0 | 0.116568  | 4.967997  | 1.753906  |
| 21 | 1 | 0 | 0.383380  | 3.439199  | 2.613506  |
| 22 | 1 | 0 | -1.229626 | 4.142787  | 2.524106  |
| 23 | 6 | 0 | -1.436926 | 4.154585  | -0.256794 |
| 24 | 1 | 0 | -1.754722 | 3.678883  | -1.189094 |
| 25 | 1 | 0 | -0.871532 | 5.056189  | -0.511994 |
| 26 | 1 | 0 | -2.338328 | 4.483379  | 0.267506  |
| 27 | 6 | 0 | -0.428594 | -0.147907 | -2.297094 |
| 28 | 1 | 0 | -0.906799 | 0.563189  | -2.977194 |
| 29 | 1 | 0 | 0.540908  | -0.396000 | -2.740294 |
| 30 | 6 | 0 | -1.339684 | -1.407914 | -2.203094 |
| 31 | 1 | 0 | -2.084586 | -1.222620 | -1.424394 |
| 32 | 6 | 0 | -0.601775 | -2.686908 | -1.819694 |
| 33 | 6 | 0 | -2.126483 | -1.574620 | -3.527594 |
| 34 | 1 | 0 | -2.570090 | -0.604823 | -3.781794 |
| 35 | 1 | 0 | -1.436881 | -1.815415 | -4.347894 |
| 36 | 6 | 0 | -0.894270 | -3.335211 | -0.685594 |
| 37 | 1 | 0 | -1.655473 | -2.974116 | 0.000906  |
| 38 | 1 | 0 | -0.386563 | -4.255307 | -0.404794 |
| 39 | 6 | 0 | 0.432729  | -3.232301 | -2.777894 |
| 40 | 1 | 0 | 1.196124  | -2.484095 | -3.026994 |
| 41 | 1 | 0 | -0.021868 | -3.542204 | -3.727894 |
| 42 | 1 | 0 | 0.939936  | -4.104097 | -2.352994 |

|    |   |   |           |           |           |
|----|---|---|-----------|-----------|-----------|
| 43 | 6 | 0 | -3.240175 | -2.641428 | -3.479294 |
| 44 | 1 | 0 | -2.808368 | -3.619125 | -3.236594 |
| 45 | 1 | 0 | -3.663474 | -2.725331 | -4.492194 |
| 46 | 6 | 0 | -4.366377 | -2.335237 | -2.509894 |
| 47 | 6 | 0 | -5.111487 | -1.037442 | -2.715994 |
| 48 | 1 | 0 | -5.992187 | -0.976749 | -2.068894 |
| 49 | 1 | 0 | -5.445388 | -0.932645 | -3.757794 |
| 50 | 1 | 0 | -4.475593 | -0.171037 | -2.494294 |
| 51 | 6 | 0 | -4.695271 | -3.185639 | -1.530794 |
| 52 | 1 | 0 | -4.153164 | -4.114735 | -1.373894 |
| 53 | 1 | 0 | -5.520973 | -2.983745 | -0.852094 |
| 54 | 6 | 0 | -2.809410 | 2.087275  | 1.541606  |
| 55 | 1 | 0 | -2.703615 | 2.655976  | 2.464806  |
| 56 | 1 | 0 | -3.379615 | 2.697071  | 0.834406  |
| 57 | 6 | 0 | 1.112512  | -0.924996 | 2.355906  |
| 58 | 6 | 0 | 2.163618  | -1.737288 | 1.697006  |
| 59 | 6 | 0 | 2.325818  | -1.693387 | 0.314506  |
| 60 | 8 | 0 | 1.512012  | -0.917893 | -0.480494 |
| 61 | 6 | 0 | 3.019024  | -2.556782 | 2.453006  |
| 62 | 1 | 0 | 2.890325  | -2.593682 | 3.529106  |
| 63 | 6 | 0 | 4.007630  | -3.301174 | 1.835306  |
| 64 | 6 | 0 | 4.150629  | -3.232673 | 0.427806  |
| 65 | 6 | 0 | 3.315423  | -2.433979 | -0.338194 |
| 66 | 1 | 0 | 3.413423  | -2.377479 | -1.418394 |

|    |   |   |           |           |           |
|----|---|---|-----------|-----------|-----------|
| 67 | 8 | 0 | 4.838936  | -4.092768 | 2.566306  |
| 68 | 1 | 0 | 5.454439  | -4.528263 | 1.952406  |
| 69 | 8 | 0 | 5.160135  | -4.006866 | -0.082194 |
| 70 | 1 | 0 | 5.196034  | -3.918065 | -1.046594 |
| 71 | 8 | 0 | 0.920613  | -0.992397 | 3.562306  |
| 72 | 8 | 0 | -0.674504 | 1.225691  | 3.129106  |
| 73 | 6 | 0 | -3.581701 | 0.811969  | 1.784506  |
| 74 | 1 | 0 | -3.881997 | 0.288667  | 0.878306  |
| 75 | 6 | 0 | -3.955997 | 0.279867  | 2.959106  |
| 76 | 6 | 0 | -3.645501 | 0.853969  | 4.318806  |
| 77 | 1 | 0 | -3.111896 | 0.113373  | 4.929006  |
| 78 | 1 | 0 | -4.573603 | 1.096762  | 4.856106  |
| 79 | 1 | 0 | -3.018808 | 1.745274  | 4.278406  |
| 80 | 6 | 0 | -4.759187 | -1.000139 | 2.990806  |
| 81 | 1 | 0 | -4.232682 | -1.780136 | 3.558406  |
| 82 | 1 | 0 | -4.957084 | -1.385341 | 1.985206  |
| 83 | 1 | 0 | -5.724788 | -0.849247 | 3.494606  |
| 84 | 6 | 0 | 3.771076  | 3.938624  | -1.898594 |
| 85 | 6 | 0 | 5.223679  | 3.529335  | -1.974694 |
| 86 | 1 | 0 | 5.866773  | 4.393340  | -2.194194 |
| 87 | 1 | 0 | 5.390184  | 2.806636  | -2.786194 |
| 88 | 1 | 0 | 5.571682  | 3.077937  | -1.040294 |
| 89 | 6 | 0 | 3.233971  | 4.560720  | -3.164994 |
| 90 | 1 | 0 | 3.795865  | 5.470924  | -3.416994 |

| 91              | 1      | 0      | 2.176869                | 4.829212  | -3.104194 |
|-----------------|--------|--------|-------------------------|-----------|-----------|
| 92              | 1      | 0      | 3.358976                | 3.876221  | -4.015594 |
| Conformer 15a-1 |        |        |                         |           |           |
| Center          | Atomic | Atomic | Coordinates (Angstroms) |           |           |
| Number          | Number | Type   | X                       | Y         | Z         |
| 1               | 6      | 0      | 1.433006                | 0.480008  | -0.454700 |
| 2               | 6      | 0      | -0.458385               | 1.222599  | 1.143997  |
| 3               | 6      | 0      | -1.412901               | 0.515396  | 0.198292  |
| 4               | 6      | 0      | -1.076350               | -0.064015 | -0.996847 |
| 5               | 6      | 0      | 0.359284                | -0.204415 | -1.357435 |
| 6               | 6      | 0      | -3.715887               | -0.001528 | -0.055805 |
| 7               | 6      | 0      | -3.490718               | -0.580637 | -1.301529 |
| 8               | 6      | 0      | -2.129555               | -0.641109 | -1.874290 |
| 9               | 6      | 0      | -4.985681               | 0.070539  | 0.521076  |
| 10              | 6      | 0      | -6.059425               | -0.460458 | -0.179875 |
| 11              | 6      | 0      | -5.852743               | -1.054737 | -1.451293 |
| 12              | 6      | 0      | -4.589873               | -1.111464 | -2.001209 |
| 13              | 8      | 0      | -1.932199               | -1.122228 | -2.983866 |
| 14              | 8      | 0      | -7.305525               | -0.410229 | 0.348496  |
| 15              | 6      | 0      | 0.778964                | 1.616019  | 0.318905  |
| 16              | 8      | 0      | 1.219696                | 2.747767  | 0.340041  |
| 17              | 6      | 0      | -1.133498               | 2.508251  | 1.726042  |
| 18              | 6      | 0      | -2.286759               | 5.441376  | -0.618944 |
| 19              | 6      | 0      | -1.473079               | 4.683118  | 0.404128  |

|    |   |   |           |           |           |
|----|---|---|-----------|-----------|-----------|
| 20 | 6 | 0 | -1.788174 | 3.414785  | 0.710779  |
| 21 | 6 | 0 | -0.337433 | 5.474842  | 1.001260  |
| 22 | 6 | 0 | 1.923830  | -0.561600 | 0.626373  |
| 23 | 6 | 0 | 0.081150  | 0.230489  | 2.291954  |
| 24 | 6 | 0 | 0.830973  | -1.004249 | 1.654612  |
| 25 | 6 | 0 | -0.074197 | -2.192764 | 1.172909  |
| 26 | 6 | 0 | 0.276955  | -3.495998 | 1.849189  |
| 27 | 6 | 0 | 1.087573  | 0.994086  | 3.192813  |
| 28 | 6 | 0 | -1.053643 | -0.240547 | 3.228715  |
| 29 | 8 | 0 | -2.677955 | 0.541909  | 0.669224  |
| 30 | 8 | 0 | -6.998172 | -1.538925 | -2.036827 |
| 31 | 8 | 0 | 0.718586  | -0.889245 | -2.299272 |
| 32 | 6 | 0 | 2.570826  | 1.006193  | -1.377230 |
| 33 | 6 | 0 | 4.063291  | 1.148080  | -0.930997 |
| 34 | 6 | 0 | 4.710815  | -0.214913 | -0.412268 |
| 35 | 6 | 0 | 3.918236  | -1.470177 | -0.838036 |
| 36 | 6 | 0 | 2.681295  | -1.769133 | 0.040083  |
| 37 | 6 | 0 | 4.261490  | 2.218300  | 0.161698  |
| 38 | 6 | 0 | 4.772267  | 1.680927  | -2.200837 |
| 39 | 6 | 0 | 6.208345  | -0.357341 | -0.701937 |
| 40 | 6 | 0 | 6.668236  | -0.962913 | -2.011477 |
| 41 | 6 | 0 | 7.109895  | -0.004518 | 0.223845  |
| 42 | 6 | 0 | 0.438955  | -4.710077 | 1.300199  |
| 43 | 6 | 0 | 0.305947  | -5.022959 | -0.170329 |



|    |   |   |           |           |           |
|----|---|---|-----------|-----------|-----------|
| 44 | 6 | 0 | 0.771928  | -5.904884 | 2.163360  |
| 45 | 1 | 0 | -5.136088 | 0.530837  | 1.490673  |
| 46 | 1 | 0 | -4.400477 | -1.558163 | -2.973893 |
| 47 | 1 | 0 | -7.913300 | -0.826054 | -0.288543 |
| 48 | 1 | 0 | -0.368558 | 3.052914  | 2.277288  |
| 49 | 1 | 0 | -1.892902 | 2.192976  | 2.449273  |
| 50 | 1 | 0 | -3.104399 | 4.837055  | -1.024554 |
| 51 | 1 | 0 | -2.720366 | 6.353170  | -0.184335 |
| 52 | 1 | 0 | -1.656099 | 5.768197  | -1.457627 |
| 53 | 1 | 0 | -2.650245 | 2.987895  | 0.200098  |
| 54 | 1 | 0 | -0.718831 | 6.379713  | 1.495074  |
| 55 | 1 | 0 | 0.256638  | 4.910022  | 1.719930  |
| 56 | 1 | 0 | 0.345319  | 5.811880  | 0.210034  |
| 57 | 1 | 0 | 2.656266  | -0.001510 | 1.214884  |
| 58 | 1 | 0 | 1.408685  | -1.413453 | 2.494157  |
| 59 | 1 | 0 | -1.125537 | -1.974186 | 1.388594  |
| 60 | 1 | 0 | -0.026060 | -2.306886 | 0.090250  |
| 61 | 1 | 0 | 0.390722  | -3.423515 | 2.933438  |
| 62 | 1 | 0 | 1.518711  | 0.298271  | 3.921701  |
| 63 | 1 | 0 | 1.911493  | 1.451923  | 2.640424  |
| 64 | 1 | 0 | 0.594169  | 1.788648  | 3.759613  |
| 65 | 1 | 0 | -1.910294 | -0.667508 | 2.705131  |
| 66 | 1 | 0 | -0.666099 | -1.002850 | 3.915447  |
| 67 | 1 | 0 | -1.424285 | 0.586660  | 3.841467  |

|    |   |   |           |           |           |
|----|---|---|-----------|-----------|-----------|
| 68 | 1 | 0 | -6.787985 | -1.923252 | -2.901543 |
| 69 | 1 | 0 | 2.257282  | 2.002329  | -1.707701 |
| 70 | 1 | 0 | 2.556108  | 0.373717  | -2.265844 |
| 71 | 1 | 0 | 4.650987  | -0.169642 | 0.682042  |
| 72 | 1 | 0 | 3.621045  | -1.400739 | -1.888966 |
| 73 | 1 | 0 | 4.569845  | -2.349219 | -0.769654 |
| 74 | 1 | 0 | 3.003053  | -2.367623 | 0.903284  |
| 75 | 1 | 0 | 2.006379  | -2.407868 | -0.535008 |
| 76 | 1 | 0 | 3.841671  | 3.180115  | -0.146423 |
| 77 | 1 | 0 | 3.782039  | 1.944885  | 1.107677  |
| 78 | 1 | 0 | 5.331128  | 2.354889  | 0.360466  |
| 79 | 1 | 0 | 4.336959  | 2.644145  | -2.491370 |
| 80 | 1 | 0 | 4.655528  | 1.003779  | -3.054300 |
| 81 | 1 | 0 | 5.840491  | 1.838804  | -2.025145 |
| 82 | 1 | 0 | 7.761237  | -0.981190 | -2.067449 |
| 83 | 1 | 0 | 6.313604  | -1.995444 | -2.119812 |
| 84 | 1 | 0 | 6.295491  | -0.413736 | -2.881722 |
| 85 | 1 | 0 | 8.178746  | -0.104335 | 0.048766  |
| 86 | 1 | 0 | 6.815864  | 0.392227  | 1.192608  |
| 87 | 1 | 0 | 0.098919  | -4.148151 | -0.790614 |
| 88 | 1 | 0 | 1.222117  | -5.496431 | -0.549567 |
| 89 | 1 | 0 | -0.505406 | -5.745607 | -0.336490 |
| 90 | 1 | 0 | 0.854082  | -5.636775 | 3.221543  |
| 91 | 1 | 0 | 1.721596  | -6.363448 | 1.853474  |

| 92              | 1      | 0      | 0.005544                | -6.687293 | 2.069710  |
|-----------------|--------|--------|-------------------------|-----------|-----------|
| Conformer 15a-9 |        |        |                         |           |           |
| Center          | Atomic | Atomic | Coordinates (Angstroms) |           |           |
| Number          | Number | Type   | X                       | Y         | Z         |
| 1               | 6      | 0      | 1.573556                | 0.385560  | -0.780731 |
| 2               | 6      | 0      | -0.664996               | 1.543628  | -0.110017 |
| 3               | 6      | 0      | -1.349030               | 0.245483  | -0.508261 |
| 4               | 6      | 0      | -0.718587               | -0.879761 | -0.972812 |
| 5               | 6      | 0      | 0.765322                | -0.929353 | -0.992401 |
| 6               | 6      | 0      | -3.503648               | -0.731740 | -0.715228 |
| 7               | 6      | 0      | -2.967958               | -1.913530 | -1.218777 |
| 8               | 6      | 0      | -1.509824               | -2.064854 | -1.402381 |
| 9               | 6      | 0      | -4.875717               | -0.549030 | -0.529205 |
| 10              | 6      | 0      | -5.730760               | -1.590993 | -0.859330 |
| 11              | 6      | 0      | -5.205847               | -2.804074 | -1.374328 |
| 12              | 6      | 0      | -3.847682               | -2.959739 | -1.551954 |
| 13              | 8      | 0      | -1.036236               | -3.085450 | -1.887058 |
| 14              | 8      | 0      | -7.067249               | -1.449816 | -0.691313 |
| 15              | 6      | 0      | 0.640446                | 1.576378  | -0.959555 |
| 16              | 8      | 0      | 0.895559                | 2.512802  | -1.690293 |
| 17              | 6      | 0      | -1.519531               | 2.780436  | -0.570337 |
| 18              | 6      | 0      | -4.345409               | 4.781543  | 1.267968  |
| 19              | 6      | 0      | -3.040228               | 4.486824  | 0.564755  |
| 20              | 6      | 0      | -2.727940               | 3.227098  | 0.212895  |

|    |   |   |           |           |           |
|----|---|---|-----------|-----------|-----------|
| 21 | 6 | 0 | -2.194911 | 5.709996  | 0.300931  |
| 22 | 6 | 0 | 2.037521  | 0.478823  | 0.726819  |
| 23 | 6 | 0 | -0.223812 | 1.548996  | 1.435103  |
| 24 | 6 | 0 | 0.860637  | 0.442802  | 1.743458  |
| 25 | 6 | 0 | 0.335415  | -1.002935 | 2.065039  |
| 26 | 6 | 0 | 0.635804  | -1.425281 | 3.482802  |
| 27 | 6 | 0 | 0.392620  | 2.936607  | 1.746783  |
| 28 | 6 | 0 | -1.422794 | 1.376163  | 2.394070  |
| 29 | 8 | 0 | -2.688807 | 0.327544  | -0.379785 |
| 30 | 8 | 0 | -6.159951 | -3.750827 | -1.661059 |
| 31 | 8 | 0 | 1.360926  | -1.982201 | -1.151368 |
| 32 | 6 | 0 | 2.717182  | 0.395268  | -1.848076 |
| 33 | 6 | 0 | 4.126273  | 1.020026  | -1.620908 |
| 34 | 6 | 0 | 5.060605  | 0.200887  | -0.652288 |
| 35 | 6 | 0 | 4.580073  | 0.078880  | 0.818434  |
| 36 | 6 | 0 | 3.180688  | -0.492340 | 1.093970  |
| 37 | 6 | 0 | 4.789984  | 1.027366  | -3.021901 |
| 38 | 6 | 0 | 4.075705  | 2.497340  | -1.169922 |
| 39 | 6 | 0 | 5.563904  | -1.151386 | -1.183145 |
| 40 | 6 | 0 | 7.059590  | -1.208640 | -1.408800 |
| 41 | 6 | 0 | 4.816638  | -2.242419 | -1.397504 |
| 42 | 6 | 0 | 1.192399  | -2.568700 | 3.913844  |
| 43 | 6 | 0 | 1.648905  | -3.700348 | 3.025182  |
| 44 | 6 | 0 | 1.395903  | -2.815109 | 5.390832  |

|    |   |   |           |           |           |
|----|---|---|-----------|-----------|-----------|
| 45 | 1 | 0 | -5.271942 | 0.381861  | -0.140697 |
| 46 | 1 | 0 | -3.415961 | -3.875197 | -1.948180 |
| 47 | 1 | 0 | -7.490371 | -2.277515 | -0.981357 |
| 48 | 1 | 0 | -1.841224 | 2.553304  | -1.596950 |
| 49 | 1 | 0 | -0.817367 | 3.604530  | -0.684194 |
| 50 | 1 | 0 | -4.171806 | 5.263667  | 2.240404  |
| 51 | 1 | 0 | -4.934218 | 3.874606  | 1.438764  |
| 52 | 1 | 0 | -4.960568 | 5.479549  | 0.682665  |
| 53 | 1 | 0 | -3.456706 | 2.456625  | 0.448233  |
| 54 | 1 | 0 | -2.007364 | 6.259578  | 1.233704  |
| 55 | 1 | 0 | -2.725509 | 6.405385  | -0.364458 |
| 56 | 1 | 0 | -1.229556 | 5.487382  | -0.158695 |
| 57 | 1 | 0 | 2.457770  | 1.483463  | 0.820817  |
| 58 | 1 | 0 | 1.312047  | 0.792276  | 2.681286  |
| 59 | 1 | 0 | 0.756906  | -1.726130 | 1.367349  |
| 60 | 1 | 0 | -0.747570 | -1.056851 | 1.914834  |
| 61 | 1 | 0 | 0.341751  | -0.699060 | 4.244026  |
| 62 | 1 | 0 | 1.218180  | 3.206298  | 1.081301  |
| 63 | 1 | 0 | 0.774263  | 2.945739  | 2.774121  |
| 64 | 1 | 0 | -0.362947 | 3.722188  | 1.671091  |
| 65 | 1 | 0 | -1.048696 | 1.247579  | 3.417059  |
| 66 | 1 | 0 | -2.063909 | 2.258997  | 2.385350  |
| 67 | 1 | 0 | -2.048777 | 0.511668  | 2.161738  |
| 68 | 1 | 0 | -5.736698 | -4.546779 | -2.017489 |

|    |   |   |          |           |           |
|----|---|---|----------|-----------|-----------|
| 69 | 1 | 0 | 2.294444 | 0.900226  | -2.723191 |
| 70 | 1 | 0 | 2.882480 | -0.639861 | -2.144657 |
| 71 | 1 | 0 | 5.962754 | 0.826575  | -0.585197 |
| 72 | 1 | 0 | 5.313840 | -0.545604 | 1.344417  |
| 73 | 1 | 0 | 4.642457 | 1.068485  | 1.292676  |
| 74 | 1 | 0 | 3.049453 | -1.460236 | 0.603768  |
| 75 | 1 | 0 | 3.116584 | -0.690080 | 2.171339  |
| 76 | 1 | 0 | 4.238297 | 1.684084  | -3.704746 |
| 77 | 1 | 0 | 4.817946 | 0.025670  | -3.461468 |
| 78 | 1 | 0 | 5.819314 | 1.402139  | -2.963119 |
| 79 | 1 | 0 | 3.714257 | 2.636144  | -0.147509 |
| 80 | 1 | 0 | 5.079615 | 2.938400  | -1.217273 |
| 81 | 1 | 0 | 3.418632 | 3.073264  | -1.827635 |
| 82 | 1 | 0 | 7.383969 | -2.197676 | -1.747875 |
| 83 | 1 | 0 | 7.377184 | -0.469907 | -2.157315 |
| 84 | 1 | 0 | 7.607074 | -0.969051 | -0.485801 |
| 85 | 1 | 0 | 3.743367 | -2.284412 | -1.254984 |
| 86 | 1 | 0 | 5.283104 | -3.162228 | -1.745618 |
| 87 | 1 | 0 | 2.705538 | -3.936355 | 3.212340  |
| 88 | 1 | 0 | 1.083743 | -4.615870 | 3.249833  |
| 89 | 1 | 0 | 1.534935 | -3.495312 | 1.958673  |
| 90 | 1 | 0 | 2.456649 | -2.989514 | 5.620331  |
| 91 | 1 | 0 | 0.856828 | -3.714821 | 5.719927  |
| 92 | 1 | 0 | 1.050913 | -1.972879 | 5.999228  |

---

| Conformer 15b-1 |        |        |                         |           |           |
|-----------------|--------|--------|-------------------------|-----------|-----------|
| Center          | Atomic | Atomic | Coordinates (Angstroms) |           |           |
| Number          | Number | Type   | X                       | Y         | Z         |
| 1               | 6      | 0      | -1.541066               | -0.696843 | -0.367949 |
| 2               | 6      | 0      | 0.473699                | -1.223198 | 1.172100  |
| 3               | 6      | 0      | 1.338073                | -0.501888 | 0.155465  |
| 4               | 6      | 0      | 0.901579                | 0.013301  | -1.036223 |
| 5               | 6      | 0      | -0.555745               | 0.065897  | -1.311860 |
| 6               | 6      | 0      | 3.576309                | 0.175421  | -0.226060 |
| 7               | 6      | 0      | 3.253058                | 0.682765  | -1.481989 |
| 8               | 6      | 0      | 1.869008                | 0.609224  | -1.995091 |
| 9               | 6      | 0      | 4.868997                | 0.242906  | 0.298897  |
| 10              | 6      | 0      | 5.863322                | 0.835158  | -0.466937 |
| 11              | 6      | 0      | 5.556539                | 1.352774  | -1.751282 |
| 12              | 6      | 0      | 4.273101                | 1.275708  | -2.248456 |
| 13              | 8      | 0      | 1.588391                | 1.004502  | -3.120391 |
| 14              | 8      | 0      | 7.128040                | 0.919214  | 0.011545  |
| 15              | 6      | 0      | -0.770456               | -1.744335 | 0.420925  |
| 16              | 8      | 0      | -1.128897               | -2.902073 | 0.524426  |
| 17              | 6      | 0      | 1.255874                | -2.432605 | 1.777227  |
| 18              | 6      | 0      | 4.257553                | -3.367348 | 1.598591  |
| 19              | 6      | 0      | 3.138720                | -3.780253 | 0.673688  |
| 20              | 6      | 0      | 1.865764                | -3.362059 | 0.755919  |
| 21              | 6      | 0      | 3.553304                | -4.759901 | -0.399717 |

|    |   |   |           |           |           |
|----|---|---|-----------|-----------|-----------|
| 22 | 6 | 0 | -2.086880 | 0.297188  | 0.736105  |
| 23 | 6 | 0 | -0.076064 | -0.210945 | 2.298491  |
| 24 | 6 | 0 | -0.983837 | 0.907092  | 1.653515  |
| 25 | 6 | 0 | -0.250836 | 2.152857  | 1.036465  |
| 26 | 6 | 0 | -0.538513 | 3.423991  | 1.797125  |
| 27 | 6 | 0 | -0.934205 | -1.010299 | 3.314836  |
| 28 | 6 | 0 | 1.068562  | 0.426232  | 3.115599  |
| 29 | 8 | 0 | 2.620752  | -0.425978 | 0.562270  |
| 30 | 8 | 0 | 6.631058  | 1.909509  | -2.403497 |
| 31 | 8 | 0 | -1.004374 | 0.726348  | -2.233614 |
| 32 | 6 | 0 | -2.629104 | -1.350091 | -1.278654 |
| 33 | 6 | 0 | -4.138730 | -1.519228 | -0.899566 |
| 34 | 6 | 0 | -4.869800 | -0.123202 | -0.998492 |
| 35 | 6 | 0 | -4.518141 | 0.900886  | 0.105902  |
| 36 | 6 | 0 | -3.053940 | 1.360001  | 0.173320  |
| 37 | 6 | 0 | -4.340537 | -2.268058 | 0.436286  |
| 38 | 6 | 0 | -4.700159 | -2.433389 | -2.017001 |
| 39 | 6 | 0 | -6.392637 | -0.176013 | -1.160407 |
| 40 | 6 | 0 | -7.266722 | -0.591836 | 0.002977  |
| 41 | 6 | 0 | -6.955016 | 0.211949  | -2.311697 |
| 42 | 6 | 0 | -0.960562 | 4.607249  | 1.322923  |
| 43 | 6 | 0 | -1.178175 | 5.775110  | 2.256874  |
| 44 | 6 | 0 | -1.244283 | 4.909691  | -0.128569 |
| 45 | 1 | 0 | 5.097366  | -0.157186 | 1.279570  |



|    |   |   |           |           |           |
|----|---|---|-----------|-----------|-----------|
| 46 | 1 | 0 | 4.006875  | 1.662505  | -3.228803 |
| 47 | 1 | 0 | 7.670429  | 1.361750  | -0.665298 |
| 48 | 1 | 0 | 2.013976  | -2.060755 | 2.466410  |
| 49 | 1 | 0 | 0.531932  | -3.007225 | 2.362467  |
| 50 | 1 | 0 | 3.955097  | -2.633059 | 2.348736  |
| 51 | 1 | 0 | 5.093047  | -2.941112 | 1.026604  |
| 52 | 1 | 0 | 4.660544  | -4.241187 | 2.129497  |
| 53 | 1 | 0 | 1.158575  | -3.767975 | 0.035604  |
| 54 | 1 | 0 | 4.346147  | -4.338811 | -1.034049 |
| 55 | 1 | 0 | 2.714453  | -5.038858 | -1.044724 |
| 56 | 1 | 0 | 3.964314  | -5.679512 | 0.040431  |
| 57 | 1 | 0 | -2.682442 | -0.336484 | 1.398638  |
| 58 | 1 | 0 | -1.546115 | 1.306527  | 2.507740  |
| 59 | 1 | 0 | 0.832890  | 1.996753  | 1.031896  |
| 60 | 1 | 0 | -0.524784 | 2.273433  | -0.012135 |
| 61 | 1 | 0 | -0.362776 | 3.355437  | 2.873162  |
| 62 | 1 | 0 | -1.404398 | -0.314622 | 4.019079  |
| 63 | 1 | 0 | -1.725593 | -1.604460 | 2.850805  |
| 64 | 1 | 0 | -0.316263 | -1.694932 | 3.902479  |
| 65 | 1 | 0 | 1.803084  | 0.956527  | 2.508065  |
| 66 | 1 | 0 | 1.606796  | -0.326969 | 3.699222  |
| 67 | 1 | 0 | 0.644733  | 1.143008  | 3.828990  |
| 68 | 1 | 0 | 6.352298  | 2.243084  | -3.269903 |
| 69 | 1 | 0 | -2.252675 | -2.353022 | -1.505051 |

|    |   |   |           |           |           |
|----|---|---|-----------|-----------|-----------|
| 70 | 1 | 0 | -2.615579 | -0.791649 | -2.216982 |
| 71 | 1 | 0 | -4.499709 | 0.310235  | -1.937667 |
| 72 | 1 | 0 | -5.138445 | 1.788615  | -0.074525 |
| 73 | 1 | 0 | -4.818483 | 0.524588  | 1.093321  |
| 74 | 1 | 0 | -2.723410 | 1.699173  | -0.814236 |
| 75 | 1 | 0 | -3.012356 | 2.236539  | 0.831627  |
| 76 | 1 | 0 | -4.179504 | -1.642294 | 1.318965  |
| 77 | 1 | 0 | -3.642658 | -3.108200 | 0.499050  |
| 78 | 1 | 0 | -5.354442 | -2.672890 | 0.513346  |
| 79 | 1 | 0 | -4.195870 | -3.406805 | -2.004250 |
| 80 | 1 | 0 | -5.772903 | -2.606409 | -1.891836 |
| 81 | 1 | 0 | -4.551860 | -1.990278 | -3.009138 |
| 82 | 1 | 0 | -7.013939 | -0.046551 | 0.920256  |
| 83 | 1 | 0 | -7.162924 | -1.658067 | 0.235494  |
| 84 | 1 | 0 | -8.322139 | -0.404430 | -0.218656 |
| 85 | 1 | 0 | -8.034696 | 0.229484  | -2.444041 |
| 86 | 1 | 0 | -6.359335 | 0.524142  | -3.166149 |
| 87 | 1 | 0 | -0.957880 | 5.515436  | 3.297305  |
| 88 | 1 | 0 | -0.543585 | 6.628197  | 1.978041  |
| 89 | 1 | 0 | -2.216267 | 6.133120  | 2.207479  |
| 90 | 1 | 0 | -1.125552 | 4.047850  | -0.788641 |
| 91 | 1 | 0 | -2.268128 | 5.289333  | -0.250734 |
| 92 | 1 | 0 | -0.575927 | 5.702380  | -0.493029 |

---

Conformer 15b-2

---

| Center | Atomic | Atomic | Coordinates (Angstroms) |           |           |
|--------|--------|--------|-------------------------|-----------|-----------|
| Number | Number | Type   | X                       | Y         | Z         |
| 1      | 6      | 0      | 1.774274                | -0.538904 | 0.312999  |
| 2      | 6      | 0      | -0.217547               | -0.879599 | -1.304632 |
| 3      | 6      | 0      | -1.122562               | -0.521974 | -0.141486 |
| 4      | 6      | 0      | -0.706904               | -0.258976 | 1.137281  |
| 5      | 6      | 0      | 0.744813                | -0.106823 | 1.408199  |
| 6      | 6      | 0      | -3.407471               | -0.216726 | 0.403405  |
| 7      | 6      | 0      | -3.101688               | 0.006400  | 1.743907  |
| 8      | 6      | 0      | -1.701679               | -0.027371 | 2.217144  |
| 9      | 6      | 0      | -4.716710               | -0.179757 | -0.082422 |
| 10     | 6      | 0      | -5.745664               | 0.085041  | 0.810237  |
| 11     | 6      | 0      | -5.456560               | 0.308871  | 2.180716  |
| 12     | 6      | 0      | -4.156455               | 0.269037  | 2.637370  |
| 13     | 8      | 0      | -1.429437               | 0.112565  | 3.403492  |
| 14     | 8      | 0      | -7.027487               | 0.128877  | 0.373560  |
| 15     | 6      | 0      | 1.084118                | -1.444645 | -0.694423 |
| 16     | 8      | 0      | 1.537846                | -2.514253 | -1.053880 |
| 17     | 6      | 0      | -0.889498               | -1.978827 | -2.189540 |
| 18     | 6      | 0      | -3.774356               | -3.225771 | -2.330532 |
| 19     | 6      | 0      | -2.625427               | -3.732768 | -1.493340 |
| 20     | 6      | 0      | -1.404233               | -3.178832 | -1.432071 |
| 21     | 6      | 0      | -2.940436               | -4.979714 | -0.700024 |
| 22     | 6      | 0      | 2.205489                | 0.721000  | -0.534352 |

|    |   |   |           |           |           |
|----|---|---|-----------|-----------|-----------|
| 23 | 6 | 0 | 0.197253  | 0.427215  | -2.155999 |
| 24 | 6 | 0 | 1.034672  | 1.434920  | -1.277804 |
| 25 | 6 | 0 | 0.217400  | 2.447235  | -0.401974 |
| 26 | 6 | 0 | 0.132817  | 3.819395  | -1.025759 |
| 27 | 6 | 0 | -1.034192 | 1.137198  | -2.757348 |
| 28 | 6 | 0 | 1.072059  | -0.022334 | -3.355944 |
| 29 | 8 | 0 | -2.417683 | -0.493743 | -0.512373 |
| 30 | 8 | 0 | -6.565210 | 0.556790  | 2.954847  |
| 31 | 8 | 0 | 1.149465  | 0.378849  | 2.450356  |
| 32 | 6 | 0 | 2.936671  | -1.272740 | 1.050143  |
| 33 | 6 | 0 | 4.435514  | -1.260647 | 0.602558  |
| 34 | 6 | 0 | 5.100177  | 0.125188  | 0.961523  |
| 35 | 6 | 0 | 4.608943  | 1.350355  | 0.157367  |
| 36 | 6 | 0 | 3.114105  | 1.692400  | 0.247670  |
| 37 | 6 | 0 | 5.093995  | -2.350912 | 1.486572  |
| 38 | 6 | 0 | 4.653440  | -1.695045 | -0.860306 |
| 39 | 6 | 0 | 6.635282  | 0.107342  | 0.958759  |
| 40 | 6 | 0 | 7.295819  | 0.138419  | 2.317617  |
| 41 | 6 | 0 | 7.374642  | 0.127099  | -0.156986 |
| 42 | 6 | 0 | -0.933255 | 4.625326  | -1.151437 |
| 43 | 6 | 0 | -0.796990 | 5.987946  | -1.790195 |
| 44 | 6 | 0 | -2.329410 | 4.296630  | -0.681619 |
| 45 | 1 | 0 | -4.930378 | -0.357647 | -1.129601 |
| 46 | 1 | 0 | -3.903182 | 0.435711  | 3.681233  |

|    |   |   |           |           |           |
|----|---|---|-----------|-----------|-----------|
| 47 | 1 | 0 | -7.594104 | 0.322500  | 1.141417  |
| 48 | 1 | 0 | -1.681311 | -1.524587 | -2.785012 |
| 49 | 1 | 0 | -0.118007 | -2.329448 | -2.881348 |
| 50 | 1 | 0 | -4.660273 | -3.051712 | -1.704579 |
| 51 | 1 | 0 | -3.550449 | -2.297721 | -2.861569 |
| 52 | 1 | 0 | -4.067375 | -3.976120 | -3.078288 |
| 53 | 1 | 0 | -0.662173 | -3.669993 | -0.806119 |
| 54 | 1 | 0 | -2.080687 | -5.319479 | -0.114465 |
| 55 | 1 | 0 | -3.778142 | -4.808181 | -0.009306 |
| 56 | 1 | 0 | -3.247653 | -5.802355 | -1.361315 |
| 57 | 1 | 0 | 2.825966  | 0.308964  | -1.334803 |
| 58 | 1 | 0 | 1.549322  | 2.060925  | -2.019001 |
| 59 | 1 | 0 | -0.780490 | 2.073221  | -0.178367 |
| 60 | 1 | 0 | 0.708995  | 2.546030  | 0.573798  |
| 61 | 1 | 0 | 1.086318  | 4.201176  | -1.398220 |
| 62 | 1 | 0 | -0.707037 | 2.038628  | -3.286404 |
| 63 | 1 | 0 | -1.546280 | 0.497511  | -3.482486 |
| 64 | 1 | 0 | -1.767697 | 1.444507  | -2.010618 |
| 65 | 1 | 0 | 1.928576  | -0.637524 | -3.066951 |
| 66 | 1 | 0 | 1.452453  | 0.861924  | -3.879470 |
| 67 | 1 | 0 | 0.487149  | -0.598086 | -4.078618 |
| 68 | 1 | 0 | -6.298154 | 0.693663  | 3.876585  |
| 69 | 1 | 0 | 2.632962  | -2.324113 | 1.095375  |
| 70 | 1 | 0 | 2.926320  | -0.900815 | 2.077496  |

| 71              | 1      | 0      | 4.800133                | 0.309547  | 2.003594  |
|-----------------|--------|--------|-------------------------|-----------|-----------|
| 72              | 1      | 0      | 4.889123                | 1.243584  | -0.899081 |
| 73              | 1      | 0      | 5.175478                | 2.216861  | 0.521730  |
| 74              | 1      | 0      | 2.802135                | 1.756516  | 1.295758  |
| 75              | 1      | 0      | 2.985523                | 2.697855  | -0.174556 |
| 76              | 1      | 0      | 6.167794                | -2.424047 | 1.289435  |
| 77              | 1      | 0      | 4.649348                | -3.330786 | 1.277894  |
| 78              | 1      | 0      | 4.952400                | -2.143360 | 2.554540  |
| 79              | 1      | 0      | 4.091026                | -2.610541 | -1.064063 |
| 80              | 1      | 0      | 5.713846                | -1.895121 | -1.043925 |
| 81              | 1      | 0      | 4.333568                | -0.947396 | -1.592496 |
| 82              | 1      | 0      | 6.994473                | -0.718936 | 2.932465  |
| 83              | 1      | 0      | 6.995778                | 1.038122  | 2.873357  |
| 84              | 1      | 0      | 8.387966                | 0.136697  | 2.240034  |
| 85              | 1      | 0      | 8.461302                | 0.136554  | -0.112726 |
| 86              | 1      | 0      | 6.938231                | 0.142526  | -1.151031 |
| 87              | 1      | 0      | 0.229210                | 6.187264  | -2.114685 |
| 88              | 1      | 0      | -1.092595               | 6.784033  | -1.092285 |
| 89              | 1      | 0      | -1.455667               | 6.083431  | -2.665209 |
| 90              | 1      | 0      | -2.661044               | 5.022359  | 0.074046  |
| 91              | 1      | 0      | -3.046214               | 4.365816  | -1.511843 |
| 92              | 1      | 0      | -2.419132               | 3.301439  | -0.239983 |
| Conformer 15c-1 |        |        |                         |           |           |
| Center          | Atomic | Atomic | Coordinates (Angstroms) |           |           |

| Number | Number | Type | X         | Y         | Z         |
|--------|--------|------|-----------|-----------|-----------|
| 1      | 6      | 0    | 1.408505  | 0.131188  | -0.681235 |
| 2      | 6      | 0    | -0.740429 | 1.492464  | -0.096229 |
| 3      | 6      | 0    | -1.513706 | 0.214324  | -0.374838 |
| 4      | 6      | 0    | -0.961356 | -0.991011 | -0.715921 |
| 5      | 6      | 0    | 0.516622  | -1.135860 | -0.706376 |
| 6      | 6      | 0    | -3.728411 | -0.627530 | -0.526938 |
| 7      | 6      | 0    | -3.271403 | -1.888773 | -0.899658 |
| 8      | 6      | 0    | -1.825588 | -2.159061 | -1.031487 |
| 9      | 6      | 0    | -5.086992 | -0.333042 | -0.391291 |
| 10     | 6      | 0    | -6.008981 | -1.340458 | -0.637854 |
| 11     | 6      | 0    | -5.564384 | -2.632450 | -1.019299 |
| 12     | 6      | 0    | -4.218231 | -2.899244 | -1.148586 |
| 13     | 8      | 0    | -1.415558 | -3.257657 | -1.388468 |
| 14     | 8      | 0    | -7.334455 | -1.090211 | -0.515610 |
| 15     | 6      | 0    | 0.565811  | 1.380400  | -0.932304 |
| 16     | 8      | 0    | 0.914711  | 2.278716  | -1.673249 |
| 17     | 6      | 0    | -1.521005 | 2.735987  | -0.665253 |
| 18     | 6      | 0    | -4.245741 | 5.034834  | 0.967949  |
| 19     | 6      | 0    | -2.948594 | 4.612583  | 0.316867  |
| 20     | 6      | 0    | -2.712517 | 3.314458  | 0.056448  |
| 21     | 6      | 0    | -2.019436 | 5.759124  | -0.001876 |
| 22     | 6      | 0    | 1.955146  | 0.316189  | 0.786453  |
| 23     | 6      | 0    | -0.287494 | 1.611521  | 1.444058  |

|    |   |   |           |           |           |
|----|---|---|-----------|-----------|-----------|
| 24 | 6 | 0 | 0.822413  | 0.548348  | 1.843374  |
| 25 | 6 | 0 | 0.323066  | -0.805701 | 2.445744  |
| 26 | 6 | 0 | 1.416863  | -1.512994 | 3.207829  |
| 27 | 6 | 0 | -1.500284 | 1.499058  | 2.392111  |
| 28 | 6 | 0 | 0.305395  | 3.028232  | 1.654707  |
| 29 | 8 | 0 | -2.846000 | 0.400627  | -0.278511 |
| 30 | 8 | 0 | -6.579216 | -3.534003 | -1.234077 |
| 31 | 8 | 0 | 1.046597  | -2.232285 | -0.708737 |
| 32 | 6 | 0 | 2.489714  | -0.008362 | -1.808437 |
| 33 | 6 | 0 | 3.954181  | -0.530725 | -1.621848 |
| 34 | 6 | 0 | 4.838966  | 0.565016  | -0.912246 |
| 35 | 6 | 0 | 4.493949  | 0.834007  | 0.567516  |
| 36 | 6 | 0 | 3.084978  | 1.374339  | 0.850567  |
| 37 | 6 | 0 | 4.054413  | -1.912615 | -0.950474 |
| 38 | 6 | 0 | 4.472581  | -0.703139 | -3.072815 |
| 39 | 6 | 0 | 6.352026  | 0.352060  | -1.056142 |
| 40 | 6 | 0 | 7.055752  | 1.261447  | -2.037277 |
| 41 | 6 | 0 | 7.049957  | -0.526183 | -0.325677 |
| 42 | 6 | 0 | 1.787284  | -2.802887 | 3.152950  |
| 43 | 6 | 0 | 2.879893  | -3.320922 | 4.059981  |
| 44 | 6 | 0 | 1.175700  | -3.850628 | 2.254637  |
| 45 | 1 | 0 | -5.422461 | 0.656787  | -0.104649 |
| 46 | 1 | 0 | -3.846352 | -3.877591 | -1.441801 |
| 47 | 1 | 0 | -7.811208 | -1.911366 | -0.731586 |



|    |   |   |           |           |           |
|----|---|---|-----------|-----------|-----------|
| 48 | 1 | 0 | -0.772114 | 3.506613  | -0.836819 |
| 49 | 1 | 0 | -1.845378 | 2.440818  | -1.673821 |
| 50 | 1 | 0 | -4.802411 | 5.731592  | 0.325422  |
| 51 | 1 | 0 | -4.895174 | 4.179890  | 1.181255  |
| 52 | 1 | 0 | -4.060427 | 5.566185  | 1.912200  |
| 53 | 1 | 0 | -3.497615 | 2.611693  | 0.320353  |
| 54 | 1 | 0 | -1.801853 | 6.344081  | 0.902490  |
| 55 | 1 | 0 | -2.496319 | 6.451872  | -0.709255 |
| 56 | 1 | 0 | -1.067928 | 5.446987  | -0.437379 |
| 57 | 1 | 0 | 2.405115  | -0.644003 | 1.054976  |
| 58 | 1 | 0 | 1.323936  | 1.025019  | 2.695937  |
| 59 | 1 | 0 | -0.481492 | -0.588247 | 3.157501  |
| 60 | 1 | 0 | -0.112012 | -1.465065 | 1.695046  |
| 61 | 1 | 0 | 1.941940  | -0.876452 | 3.924919  |
| 62 | 1 | 0 | -1.156542 | 1.544280  | 3.432602  |
| 63 | 1 | 0 | -2.061366 | 0.569380  | 2.267613  |
| 64 | 1 | 0 | -2.188901 | 2.331494  | 2.238092  |
| 65 | 1 | 0 | -0.462151 | 3.794806  | 1.528155  |
| 66 | 1 | 0 | 0.689163  | 3.114628  | 2.677296  |
| 67 | 1 | 0 | 1.126286  | 3.255624  | 0.970871  |
| 68 | 1 | 0 | -6.208217 | -4.390901 | -1.494478 |
| 69 | 1 | 0 | 2.574889  | 0.982540  | -2.263210 |
| 70 | 1 | 0 | 2.034396  | -0.643493 | -2.576727 |
| 71 | 1 | 0 | 4.613126  | 1.498572  | -1.450028 |

|    |   |   |          |           |           |
|----|---|---|----------|-----------|-----------|
| 72 | 1 | 0 | 5.215471 | 1.574359  | 0.935955  |
| 73 | 1 | 0 | 4.663646 | -0.067153 | 1.170213  |
| 74 | 1 | 0 | 2.881964 | 2.215551  | 0.175566  |
| 75 | 1 | 0 | 3.097578 | 1.796834  | 1.862486  |
| 76 | 1 | 0 | 3.416148 | -2.632183 | -1.468255 |
| 77 | 1 | 0 | 3.738126 | -1.911411 | 0.094987  |
| 78 | 1 | 0 | 5.086832 | -2.274469 | -0.993417 |
| 79 | 1 | 0 | 3.870916 | -1.447349 | -3.607074 |
| 80 | 1 | 0 | 4.417853 | 0.236204  | -3.637412 |
| 81 | 1 | 0 | 5.510675 | -1.049040 | -3.080056 |
| 82 | 1 | 0 | 6.924548 | 2.314792  | -1.751225 |
| 83 | 1 | 0 | 8.130049 | 1.055288  | -2.084077 |
| 84 | 1 | 0 | 6.643640 | 1.162005  | -3.049022 |
| 85 | 1 | 0 | 8.126503 | -0.627279 | -0.443383 |
| 86 | 1 | 0 | 6.589071 | -1.170321 | 0.416775  |
| 87 | 1 | 0 | 3.285696 | -2.536204 | 4.706690  |
| 88 | 1 | 0 | 2.507657 | -4.131604 | 4.702473  |
| 89 | 1 | 0 | 3.708194 | -3.745929 | 3.476175  |
| 90 | 1 | 0 | 0.510977 | -3.447587 | 1.489442  |
| 91 | 1 | 0 | 1.961401 | -4.412253 | 1.733005  |
| 92 | 1 | 0 | 0.613517 | -4.583444 | 2.851589  |

---

Conformer 15c-2

| Center | Atomic | Atomic | Coordinates (Angstroms) |   |   |
|--------|--------|--------|-------------------------|---|---|
| Number | Number | Type   | X                       | Y | Z |

---

|    |   |   |           |           |           |
|----|---|---|-----------|-----------|-----------|
| 1  | 6 | 0 | 1.377997  | -0.052923 | -0.789122 |
| 2  | 6 | 0 | -0.735533 | 1.385121  | -0.267080 |
| 3  | 6 | 0 | -1.533536 | 0.101582  | -0.446027 |
| 4  | 6 | 0 | -1.005956 | -1.125816 | -0.740413 |
| 5  | 6 | 0 | 0.467645  | -1.300371 | -0.674570 |
| 6  | 6 | 0 | -3.754131 | -0.731962 | -0.492789 |
| 7  | 6 | 0 | -3.327651 | -2.012736 | -0.836044 |
| 8  | 6 | 0 | -1.885929 | -2.289988 | -1.023005 |
| 9  | 6 | 0 | -5.106374 | -0.427510 | -0.310253 |
| 10 | 6 | 0 | -6.036119 | -1.442311 | -0.477309 |
| 11 | 6 | 0 | -5.632294 | -2.754848 | -0.826781 |
| 12 | 6 | 0 | -4.287727 | -3.025057 | -1.005123 |
| 13 | 8 | 0 | -1.485897 | -3.381965 | -1.403730 |
| 14 | 8 | 0 | -7.388376 | -1.282812 | -0.327833 |
| 15 | 6 | 0 | 0.547011  | 1.184411  | -1.124471 |
| 16 | 8 | 0 | 0.888861  | 2.012821  | -1.945771 |
| 17 | 6 | 0 | -1.509894 | 2.592481  | -0.915886 |
| 18 | 6 | 0 | -1.972840 | 5.664673  | -0.502526 |
| 19 | 6 | 0 | -2.899996 | 4.557953  | -0.061378 |
| 20 | 6 | 0 | -2.679175 | 3.240593  | -0.217423 |
| 21 | 6 | 0 | -4.175768 | 5.045484  | 0.586263  |
| 22 | 6 | 0 | 1.963353  | 0.249666  | 0.639319  |
| 23 | 6 | 0 | -0.239322 | 1.623087  | 1.246502  |
| 24 | 6 | 0 | 0.856113  | 0.568930  | 1.701502  |

|    |   |   |           |           |           |
|----|---|---|-----------|-----------|-----------|
| 25 | 6 | 0 | 0.291198  | -0.715567 | 2.404542  |
| 26 | 6 | 0 | 1.347841  | -1.696054 | 2.858113  |
| 27 | 6 | 0 | -1.427389 | 1.611092  | 2.232243  |
| 28 | 6 | 0 | 0.380938  | 3.041255  | 1.325409  |
| 29 | 8 | 0 | -2.862811 | 0.305888  | -0.327177 |
| 30 | 8 | 0 | -6.563394 | -3.733340 | -0.986389 |
| 31 | 8 | 0 | 0.970023  | -2.396213 | -0.504319 |
| 32 | 6 | 0 | 2.421271  | -0.308283 | -1.931384 |
| 33 | 6 | 0 | 3.885691  | -0.825792 | -1.737812 |
| 34 | 6 | 0 | 4.797382  | 0.315594  | -1.144042 |
| 35 | 6 | 0 | 4.493892  | 0.718724  | 0.314896  |
| 36 | 6 | 0 | 3.099245  | 1.300804  | 0.587560  |
| 37 | 6 | 0 | 3.986204  | -2.149708 | -0.958021 |
| 38 | 6 | 0 | 4.366037  | -1.122875 | -3.181632 |
| 39 | 6 | 0 | 6.304178  | 0.069675  | -1.302873 |
| 40 | 6 | 0 | 6.997446  | 0.890010  | -2.366459 |
| 41 | 6 | 0 | 7.006204  | -0.759349 | -0.520739 |
| 42 | 6 | 0 | 1.963235  | -1.737311 | 4.051349  |
| 43 | 6 | 0 | 1.709309  | -0.769846 | 5.182235  |
| 44 | 6 | 0 | 2.990571  | -2.802010 | 4.354882  |
| 45 | 1 | 0 | -5.407017 | 0.582701  | -0.047712 |
| 46 | 1 | 0 | -3.955369 | -4.020482 | -1.277997 |
| 47 | 1 | 0 | -7.595345 | -0.363922 | -0.099235 |
| 48 | 1 | 0 | -0.754742 | 3.337174  | -1.159946 |

|    |   |   |           |           |           |
|----|---|---|-----------|-----------|-----------|
| 49 | 1 | 0 | -1.857833 | 2.226047  | -1.892685 |
| 50 | 1 | 0 | -2.463073 | 6.295755  | -1.256949 |
| 51 | 1 | 0 | -1.034928 | 5.306575  | -0.931711 |
| 52 | 1 | 0 | -1.728998 | 6.325695  | 0.340672  |
| 53 | 1 | 0 | -3.460810 | 2.568887  | 0.126316  |
| 54 | 1 | 0 | -3.961502 | 5.654105  | 1.476119  |
| 55 | 1 | 0 | -4.823340 | 4.217014  | 0.891525  |
| 56 | 1 | 0 | -4.746792 | 5.689142  | -0.097819 |
| 57 | 1 | 0 | 2.425830  | -0.682426 | 0.969896  |
| 58 | 1 | 0 | 1.391006  | 1.076469  | 2.514511  |
| 59 | 1 | 0 | -0.287676 | -0.385156 | 3.270240  |
| 60 | 1 | 0 | -0.413836 | -1.249889 | 1.763433  |
| 61 | 1 | 0 | 1.617660  | -2.457290 | 2.127191  |
| 62 | 1 | 0 | -2.114981 | 2.430645  | 2.017208  |
| 63 | 1 | 0 | -1.994349 | 0.677025  | 2.212590  |
| 64 | 1 | 0 | -1.055812 | 1.754657  | 3.254068  |
| 65 | 1 | 0 | -0.381184 | 3.808280  | 1.169587  |
| 66 | 1 | 0 | 1.177855  | 3.204304  | 0.596780  |
| 67 | 1 | 0 | 0.804779  | 3.198785  | 2.323356  |
| 68 | 1 | 0 | -7.439315 | -3.343852 | -0.822994 |
| 69 | 1 | 0 | 1.938677  | -1.007914 | -2.623983 |
| 70 | 1 | 0 | 2.498761  | 0.635214  | -2.478905 |
| 71 | 1 | 0 | 4.569910  | 1.201145  | -1.757073 |
| 72 | 1 | 0 | 4.669873  | -0.128522 | 0.989939  |

| 73              | 1      | 0      | 5.234109                | 1.478032  | 0.597736  |
|-----------------|--------|--------|-------------------------|-----------|-----------|
| 74              | 1      | 0      | 3.142629                | 1.804599  | 1.560666  |
| 75              | 1      | 0      | 2.887375                | 2.085714  | -0.149452 |
| 76              | 1      | 0      | 3.310584                | -2.893843 | -1.386772 |
| 77              | 1      | 0      | 3.716800                | -2.055556 | 0.096513  |
| 78              | 1      | 0      | 5.007212                | -2.540882 | -1.012839 |
| 79              | 1      | 0      | 5.401623                | -1.475984 | -3.185846 |
| 80              | 1      | 0      | 3.747067                | -1.904472 | -3.636932 |
| 81              | 1      | 0      | 4.302441                | -0.233583 | -3.821390 |
| 82              | 1      | 0      | 6.883868                | 1.964144  | -2.161581 |
| 83              | 1      | 0      | 8.068217                | 0.667407  | -2.418386 |
| 84              | 1      | 0      | 6.563143                | 0.716915  | -3.358877 |
| 85              | 1      | 0      | 6.553326                | -1.336394 | 0.279641  |
| 86              | 1      | 0      | 8.078382                | -0.885632 | -0.652942 |
| 87              | 1      | 0      | 1.401277                | -1.305803 | 6.090941  |
| 88              | 1      | 0      | 0.938681                | -0.029502 | 4.952456  |
| 89              | 1      | 0      | 2.628423                | -0.226174 | 5.442338  |
| 90              | 1      | 0      | 3.141222                | -3.475593 | 3.505823  |
| 91              | 1      | 0      | 3.961512                | -2.355638 | 4.613180  |
| 92              | 1      | 0      | 2.688670                | -3.407868 | 5.221148  |
| Conformer 15d-1 |        |        |                         |           |           |
| Center          | Atomic | Atomic | Coordinates (Angstroms) |           |           |
| Number          | Number | Type   | X                       | Y         | Z         |
| 1               | 6      | 0      | -1.406397               | -0.545502 | -0.382901 |

|    |   |   |           |           |           |
|----|---|---|-----------|-----------|-----------|
| 2  | 6 | 0 | 0.564704  | -0.880696 | 1.243899  |
| 3  | 6 | 0 | 1.461002  | -0.275794 | 0.175799  |
| 4  | 6 | 0 | 1.037701  | 0.129705  | -1.035101 |
| 5  | 6 | 0 | -0.422399 | 0.261901  | -1.263301 |
| 6  | 6 | 0 | 3.682101  | 0.320613  | -0.251801 |
| 7  | 6 | 0 | 3.388899  | 0.703712  | -1.537901 |
| 8  | 6 | 0 | 2.011400  | 0.586808  | -2.053301 |
| 9  | 6 | 0 | 4.964700  | 0.429817  | 0.275799  |
| 10 | 6 | 0 | 5.963199  | 0.931120  | -0.520501 |
| 11 | 6 | 0 | 5.684997  | 1.322919  | -1.844701 |
| 12 | 6 | 0 | 4.421598  | 1.208715  | -2.341401 |
| 13 | 8 | 0 | 1.742399  | 0.821807  | -3.195101 |
| 14 | 8 | 0 | 7.204398  | 1.046124  | -0.033301 |
| 15 | 6 | 0 | -0.640194 | -1.490800 | 0.515299  |
| 16 | 8 | 0 | -0.980690 | -2.615901 | 0.710499  |
| 17 | 6 | 0 | 1.338508  | -2.013694 | 1.981599  |
| 18 | 6 | 0 | 4.308311  | -3.043285 | 2.058499  |
| 19 | 6 | 0 | 3.225412  | -3.494188 | 1.108599  |
| 20 | 6 | 0 | 1.980911  | -3.039292 | 1.074999  |
| 21 | 6 | 0 | 3.669516  | -4.579387 | 0.155399  |
| 22 | 6 | 0 | -2.089000 | 0.477295  | 0.592599  |
| 23 | 6 | 0 | -0.002699 | 0.239202  | 2.236399  |
| 24 | 6 | 0 | -1.062502 | 1.193899  | 1.539299  |
| 25 | 6 | 0 | -0.482506 | 2.511100  | 0.935099  |

|    |   |   |           |           |           |
|----|---|---|-----------|-----------|-----------|
| 26 | 6 | 0 | -1.535009 | 3.443097  | 0.375599  |
| 27 | 6 | 0 | 1.144698  | 1.067005  | 2.848499  |
| 28 | 6 | 0 | -0.686797 | -0.464500 | 3.433799  |
| 29 | 8 | 0 | 2.726502  | -0.190190 | 0.567499  |
| 30 | 8 | 0 | 6.756696  | 1.801423  | -2.533201 |
| 31 | 8 | 0 | -0.853702 | 1.027399  | -2.068501 |
| 32 | 6 | 0 | -2.309394 | -1.305105 | -1.412101 |
| 33 | 6 | 0 | -3.785493 | -1.772710 | -1.213201 |
| 34 | 6 | 0 | -4.655697 | -0.539112 | -0.805901 |
| 35 | 6 | 0 | -4.607298 | -0.172212 | 0.689899  |
| 36 | 6 | 0 | -3.240898 | -0.172108 | 1.384999  |
| 37 | 6 | 0 | -3.927289 | -2.994210 | -0.288201 |
| 38 | 6 | 0 | -4.194192 | -2.240711 | -2.628601 |
| 39 | 6 | 0 | -6.118897 | -0.551917 | -1.259401 |
| 40 | 6 | 0 | -7.090394 | -1.575120 | -0.709301 |
| 41 | 6 | 0 | -6.550500 | 0.371882  | -2.102801 |
| 42 | 6 | 0 | -2.186712 | 4.402495  | 1.017999  |
| 43 | 6 | 0 | -2.013513 | 4.742696  | 2.478999  |
| 44 | 6 | 0 | -3.196815 | 5.267592  | 0.302099  |
| 45 | 1 | 0 | 5.174801  | 0.128718  | 1.282999  |
| 46 | 1 | 0 | 4.184497  | 1.500215  | -3.348301 |
| 47 | 1 | 0 | 7.779497  | 1.405426  | -0.699001 |
| 48 | 1 | 0 | 2.069606  | -1.572892 | 2.638699  |
| 49 | 1 | 0 | 0.620409  | -2.533796 | 2.598899  |



|    |   |   |           |           |           |
|----|---|---|-----------|-----------|-----------|
| 50 | 1 | 0 | 4.609513  | -3.867384 | 2.701199  |
| 51 | 1 | 0 | 4.012608  | -2.220086 | 2.693299  |
| 52 | 1 | 0 | 5.192510  | -2.738782 | 1.504599  |
| 53 | 1 | 0 | 1.312912  | -3.485194 | 0.360099  |
| 54 | 1 | 0 | 2.867917  | -4.891989 | -0.502601 |
| 55 | 1 | 0 | 4.019318  | -5.453186 | 0.700599  |
| 56 | 1 | 0 | 4.499615  | -4.238184 | -0.458901 |
| 57 | 1 | 0 | -2.521402 | 1.245994  | -0.030101 |
| 58 | 1 | 0 | -1.664203 | 1.560797  | 2.361499  |
| 59 | 1 | 0 | 0.241094  | 2.325403  | 0.154899  |
| 60 | 1 | 0 | 0.055792  | 3.023702  | 1.718399  |
| 61 | 1 | 0 | -1.752809 | 3.307396  | -0.670301 |
| 62 | 1 | 0 | 0.735796  | 1.784004  | 3.553399  |
| 63 | 1 | 0 | 1.828300  | 0.434307  | 3.400099  |
| 64 | 1 | 0 | 1.722597  | 1.615207  | 2.119099  |
| 65 | 1 | 0 | -1.410495 | -1.211602 | 3.141399  |
| 66 | 1 | 0 | 0.043404  | -0.950298 | 4.068099  |
| 67 | 1 | 0 | -1.197399 | 0.272098  | 4.043799  |
| 68 | 1 | 0 | 6.516095  | 2.049522  | -3.415501 |
| 69 | 1 | 0 | -1.737992 | -2.177203 | -1.713301 |
| 70 | 1 | 0 | -2.348396 | -0.655805 | -2.272401 |
| 71 | 1 | 0 | -4.216699 | 0.294489  | -1.343701 |
| 72 | 1 | 0 | -5.043401 | 0.819086  | 0.781999  |
| 73 | 1 | 0 | -5.251196 | -0.834614 | 1.258799  |

|    |   |   |           |           |           |
|----|---|---|-----------|-----------|-----------|
| 74 | 1 | 0 | -3.372100 | 0.367192  | 2.316799  |
| 75 | 1 | 0 | -2.979095 | -1.179807 | 1.668299  |
| 76 | 1 | 0 | -3.286887 | -3.795608 | -0.639301 |
| 77 | 1 | 0 | -3.652190 | -2.803909 | 0.736399  |
| 78 | 1 | 0 | -4.945788 | -3.364513 | -0.294101 |
| 79 | 1 | 0 | -3.501689 | -2.994909 | -2.990201 |
| 80 | 1 | 0 | -5.184290 | -2.679414 | -2.636801 |
| 81 | 1 | 0 | -4.194094 | -1.420211 | -3.337601 |
| 82 | 1 | 0 | -7.072793 | -1.616720 | 0.374299  |
| 83 | 1 | 0 | -8.102494 | -1.335423 | -1.013201 |
| 84 | 1 | 0 | -6.869791 | -2.574319 | -1.068301 |
| 85 | 1 | 0 | -7.579500 | 0.419279  | -2.415101 |
| 86 | 1 | 0 | -5.894302 | 1.116584  | -2.518601 |
| 87 | 1 | 0 | -1.707216 | 5.779897  | 2.593599  |
| 88 | 1 | 0 | -2.958313 | 4.635393  | 3.006799  |
| 89 | 1 | 0 | -1.282611 | 4.122798  | 2.980599  |
| 90 | 1 | 0 | -3.292414 | 4.994792  | -0.741801 |
| 91 | 1 | 0 | -2.912418 | 6.316293  | 0.353199  |
| 92 | 1 | 0 | -4.177514 | 5.184589  | 0.765599  |

---

### 3. Experimental and Computed NMR Chemical Shifts

#### 3.1 $^{13}\text{C}$ - and $^1\text{H}$ -NMR chemical shifts

The TMS-corrected computed  $^{13}\text{C}$ - and  $^1\text{H}$ -NMR chemical shifts of compounds **3**, **7** and **15** were fitted to the experimental values by Ordinary Least Squares (OLS) Linear Regression method in order to remove systematic error that results from the conformational search and random error from experimental conditions (**Tables S3-S5**).

**Table S3.** Experimental and computed chemical shifts of **3**, **3a** and **3b**.

| Position | Exp. <b>3</b> | <b>3a</b>   | Residue      | <b>3b</b>   | Residue      |
|----------|---------------|-------------|--------------|-------------|--------------|
| 1        | 51.4          | 49.93325049 | 1.466749506  | 51.7544542  | -0.354454204 |
| 2        | 170.9         | 172.787458  | -1.887458042 | 172.2314711 | -1.331471132 |
| 3        | 126.3         | 126.4860548 | -0.186054751 | 124.4001061 | 1.89989385   |
| 4        | 194.3         | 194.1673167 | 0.132683309  | 194.0809346 | 0.219065435  |
| 5        | 69            | 71.09751873 | -2.097518735 | 71.51798118 | -2.51798118  |
| 6        | 46.7          | 50.87619094 | -4.176190938 | 51.37724583 | -4.677245832 |
| 7        | 47            | 46.80988427 | 0.190115732  | 47.50987066 | -0.509870655 |
| 8        | 39.9          | 39.22019688 | 0.679803118  | 37.70942869 | 2.190571314  |
| 9        | 206.9         | 211.6255352 | -4.725535213 | 211.8345758 | -4.934575768 |
| 10       | 192.3         | 191.3436401 | 0.956359872  | 192.1271509 | 0.172849106  |
| 11       | 131.3         | 126.6103518 | 4.689648173  | 127.2813062 | 4.018693842  |
| 12       | 115.9         | 110.5544809 | 5.345519073  | 111.1279699 | 4.772030078  |
| 13       | 146           | 141.6284721 | 4.371527924  | 142.1892954 | 3.810704557  |
| 14       | 151.3         | 149.1082658 | 2.191734233  | 149.6409181 | 1.659081945  |
| 15       | 115.6         | 111.7749119 | 3.825088084  | 112.4292199 | 3.170780079  |
| 16       | 123.6         | 125.8072753 | -2.207275316 | 126.2187064 | -2.618706422 |
| 17       | 26.4          | 26.70479885 | -0.304798848 | 27.44720217 | -1.047202172 |
| 18       | 121.6         | 120.8038464 | 0.796153581  | 121.424207  | 0.175793023  |
| 19       | 134.2         | 138.6536804 | -4.453680394 | 139.1498829 | -4.949882943 |
| 20       | 26.4          | 26.06136698 | 0.338633023  | 26.87487991 | -0.474879906 |
| 21       | 18.3          | 17.27081654 | 1.029183458  | 18.08241797 | 0.217582032  |
| 22       | 27            | 25.21802956 | 1.781970441  | 25.92564594 | 1.074354056  |
| 23       | 22.8          | 20.84068558 | 1.95931442   | 21.59354946 | 1.206450538  |
| 24       | 29.8          | 29.72551807 | 0.074481935  | 30.41061499 | -0.610614989 |
| 25       | 126.4         | 125.6046813 | 0.795318731  | 126.3611954 | 0.038804577  |
| 26       | 133.3         | 137.8617195 | -4.561719471 | 138.0185018 | -4.718501826 |
| 27       | 26.2          | 25.9723377  | 0.227662299  | 26.72321698 | -0.523216983 |
| 28       | 18.6          | 17.57259121 | 1.027408786  | 18.52689599 | 0.073104005  |
| 29       | 29.3          | 33.6370252  | -4.3370252   | 29.59559208 | -0.295592083 |
| 30       | 38.9          | 37.04921206 | 1.850787939  | 37.49113365 | 1.408866352  |
| 31       | 86            | 84.43637523 | 1.563624773  | 85.00051204 | 0.99948796   |
| 32       | 22.2          | 27.12074176 | -4.920741763 | 20.66952102 | 1.530478985  |
| 33       | 29            | 25.04719791 | 3.952802094  | 27.00813488 | 1.991865118  |
| 34       | 39.7          | 45.25666173 | -5.556661733 | 41.88798025 | -2.187980254 |

|    |       |             |              |             |              |
|----|-------|-------------|--------------|-------------|--------------|
| 35 | 199.8 | 199.4692444 | 0.330755569  | 196.9963136 | 2.803686379  |
| 36 | 145.5 | 142.300516  | 3.199484004  | 141.4766371 | 4.023362904  |
| 37 | 125.5 | 127.2756554 | -1.775655367 | 128.402119  | -2.902119019 |
| 38 | 17.9  | 19.48649431 | -1.586494305 | 20.70321077 | -2.803210767 |

**Table S4.** Experimental and computed chemical shifts of **7**, **7a** and **7b**.

| Position | Exp. <b>7</b> | <b>7a</b>   | Residue      | <b>7b</b>   | Residue      |
|----------|---------------|-------------|--------------|-------------|--------------|
| 1        | 53            | 52.51929109 | 0.480708911  | 56.39563554 | -3.395635541 |
| 2        | 174           | 175.5288602 | -1.528860224 | 175.7706018 | -1.770601774 |
| 3        | 127.1         | 128.1285239 | -1.02852393  | 122.9261794 | 4.173820557  |
| 4        | 196.8         | 196.9528939 | -0.152893885 | 193.2330898 | 3.566910193  |
| 5        | 69.6          | 71.8402837  | -2.240283696 | 74.9403582  | -5.340358197 |
| 6        | 47.7          | 52.98843816 | -5.288438162 | 54.27774252 | -6.577742521 |
| 7        | 43.5          | 44.20971037 | -0.709710369 | 40.47934573 | 3.020654266  |
| 8        | 40.3          | 42.00599777 | -1.705997767 | 41.31762317 | -1.017623165 |
| 9        | 208.2         | 212.7336373 | -4.533637252 | 211.7052974 | -3.505297442 |
| 10       | 194.8         | 194.1532241 | 0.646775922  | 196.5267486 | -1.726748574 |
| 11       | 131           | 128.7279917 | 2.272008336  | 128.4429064 | 2.557093588  |
| 12       | 116.7         | 112.3510836 | 4.348916448  | 112.549242  | 4.150757951  |
| 13       | 146.8         | 143.7307659 | 3.069234125  | 143.4882586 | 3.311741372  |
| 14       | 153.1         | 151.0723289 | 2.027671121  | 151.2337338 | 1.866266175  |
| 15       | 116           | 113.515104  | 2.48489602   | 113.7887188 | 2.211281225  |
| 16       | 124.4         | 127.556822  | -3.156821963 | 129.2936799 | -4.893679904 |
| 17       | 22.8          | 24.03751701 | -1.237517008 | 24.60480413 | -1.804804131 |
| 18       | 39.8          | 37.18177355 | 2.618226451  | 39.41576053 | 0.384239465  |
| 19       | 71.9          | 72.29629813 | -0.396298132 | 73.56333013 | -1.663330132 |
| 20       | 29.2          | 33.28850284 | -4.088502835 | 29.48195997 | -0.281959973 |
| 21       | 29.2          | 27.45875778 | 1.741242216  | 29.67990894 | -0.479908941 |
| 22       | 27.2          | 26.78716196 | 0.412838039  | 23.32632455 | 3.873675452  |
| 23       | 23.1          | 22.93151059 | 0.168489409  | 17.18006117 | 5.919938832  |
| 24       | 33.5          | 33.0391485  | 0.460851497  | 37.08912649 | -3.589126494 |
| 25       | 78.6          | 75.13783923 | 3.462160775  | 76.24979393 | 2.350206068  |
| 26       | 74.4          | 76.34191177 | -1.941911768 | 75.18725007 | -0.787250071 |
| 27       | 24.6          | 26.80327308 | -2.203273085 | 22.06715706 | 2.532842941  |
| 28       | 25.9          | 23.18271441 | 2.717285591  | 32.079058   | -6.179058002 |
| 29       | 29.2          | 27.40843058 | 1.791569423  | 27.76668625 | 1.433313745  |
| 30       | 45            | 42.12925307 | 2.870746925  | 37.55640345 | 7.443596555  |
| 31       | 89.2          | 86.19531257 | 3.004687431  | 89.25118816 | -0.051188156 |
| 32       | 21.7          | 26.83843167 | -5.13843167  | 23.54699363 | -1.846993626 |
| 33       | 29.1          | 28.90791707 | 0.192082932  | 28.3549478  | 0.745052203  |
| 34       | 26.6          | 25.61966725 | 0.980332755  | 30.29126926 | -3.691269263 |
| 35       | 42.8          | 40.89195999 | 1.908040006  | 37.51579125 | 5.284208753  |

|    |      |             |              |             |              |
|----|------|-------------|--------------|-------------|--------------|
| 36 | 71.4 | 72.14425218 | -0.74425218  | 74.64698476 | -3.246984763 |
| 37 | 29.3 | 32.94685954 | -3.646859543 | 27.74055813 | 1.559441873  |
| 38 | 29.7 | 27.61655086 | 2.083449136  | 34.23548054 | -4.535480544 |

**Table S5.** Experimental and computed chemical shifts of **15**, **15a**, **15b**, **15c** and **15d**.

| Position | Exp. <b>15</b> | <b>15a</b>  | Residue      | <b>15b</b>  | Residue      |
|----------|----------------|-------------|--------------|-------------|--------------|
| 1        | 66.3           | 69.92226967 | -3.622269673 | 69.18662347 | -2.886623466 |
| 2        | 193.1          | 192.6162254 | 0.483774602  | 193.8880441 | -0.788044118 |
| 3        | 119.2          | 119.0265441 | 0.173455859  | 118.4007772 | 0.79922283   |
| 4        | 177            | 179.0127405 | -2.012740513 | 177.9438854 | -0.943885428 |
| 5        | 63.6           | 64.5443827  | -0.944382704 | 64.31483687 | -0.714836873 |
| 6        | 48.8           | 53.79284257 | -4.992842565 | 52.39651737 | -3.596517365 |
| 7        | 47.3           | 53.58634864 | -6.286348641 | 53.78533416 | -6.485334157 |
| 8        | 38.2           | 45.54597943 | -7.345979431 | 49.91195212 | -11.71195212 |
| 9        | 207.7          | 209.223302  | -1.523302011 | 211.0956156 | -3.395615569 |
| 10       | 172.8          | 167.7578594 | 5.042140594  | 166.9384418 | 5.861558212  |
| 11       | 118            | 116.9557353 | 1.044264688  | 116.4129118 | 1.587088216  |
| 12       | 109.6          | 107.1806632 | 2.419336819  | 106.5227071 | 3.0772929    |
| 13       | 146.9          | 141.5214881 | 5.378511941  | 140.8202364 | 6.079763586  |
| 14       | 155.9          | 149.4567821 | 6.443217925  | 148.7654739 | 7.134526129  |
| 15       | 104.5          | 101.5758831 | 2.924116925  | 101.3501213 | 3.149878715  |
| 16       | 150.6          | 148.8200764 | 1.779923563  | 148.2259471 | 2.374052934  |
| 17       | 27.4           | 27.33669856 | 0.063301439  | 26.69457753 | 0.705422465  |
| 18       | 119.9          | 118.9958491 | 0.904150902  | 120.1348239 | -0.234823926 |
| 19       | 135.3          | 140.4819942 | -5.181994179 | 137.5682764 | -2.268276448 |
| 20       | 26.2           | 25.52444014 | 0.675559861  | 24.38258931 | 1.817410688  |
| 21       | 18.8           | 17.84423251 | 0.955767486  | 16.52436616 | 2.275633835  |
| 22       | 26.9           | 25.86439496 | 1.035605045  | 23.36099367 | 3.539006331  |
| 23       | 22.4           | 21.8317014  | 0.568298601  | 21.9887358  | 0.411264203  |
| 24       | 30.1           | 27.83849997 | 2.261500034  | 25.18034844 | 4.919651563  |
| 25       | 124.6          | 128.6909602 | -4.090960161 | 128.4807213 | -3.880721269 |
| 26       | 135.3          | 133.6209304 | 1.679069561  | 132.8629588 | 2.437041247  |
| 27       | 26.3           | 25.03957393 | 1.26042607   | 24.20424489 | 2.095755108  |
| 28       | 18.2           | 16.32141199 | 1.878588012  | 15.37344837 | 2.826551628  |
| 29       | 40             | 37.06442912 | 2.935570879  | 41.92382308 | -1.923823084 |
| 30       | 41.5           | 40.28288615 | 1.217113851  | 40.16918539 | 1.330814607  |
| 31       | 49.4           | 51.31356835 | -1.913568355 | 57.59211236 | -8.192112359 |
| 32       | 29.4           | 26.04019384 | 3.359806163  | 33.46663284 | -4.066632835 |
| 33       | 31.8           | 28.71508881 | 3.084911194  | 27.43211988 | 4.367880123  |
| 34       | 146.9          | 152.6232788 | -5.723278843 | 154.1943866 | -7.294386636 |
| 35       | 109.6          | 111.95533   | -2.355330014 | 109.4496453 | 0.150354739  |
| 36       | 24.3           | 20.61535019 | 3.684649812  | 24.11624758 | 0.183752423  |

| 37       | 24.7   | 27.72139693 | -3.021396934 | 18.12736289 | 6.572637108  |
|----------|--------|-------------|--------------|-------------|--------------|
| 38       | 25.7   | 27.9386678  | -2.238667802 | 31.01297394 | -5.312973936 |
| Position | Exp.15 | 15c         | Residue      | 15d         | Residue      |
| 1        | 66.3   | 66.25195895 | 0.048041048  | 68.40447626 | -2.104476256 |
| 2        | 193.1  | 196.9531897 | -3.853189714 | 195.8336543 | -2.733654287 |
| 3        | 119.2  | 115.8534034 | 3.346596569  | 119.7645066 | -0.564506623 |
| 4        | 177    | 178.7443943 | -1.74439432  | 174.7269301 | 2.273069887  |
| 5        | 63.6   | 61.97812752 | 1.621872479  | 63.62311811 | -0.023118111 |
| 6        | 48.8   | 51.73222249 | -2.932222494 | 51.82805076 | -3.028050759 |
| 7        | 47.3   | 55.59567262 | -8.295672615 | 56.79575826 | -9.495758262 |
| 8        | 38.2   | 49.55735236 | -11.35735236 | 44.68935353 | -6.48935353  |
| 9        | 207.7  | 210.0054131 | -2.305413131 | 210.6498072 | -2.949807197 |
| 10       | 172.8  | 167.1273791 | 5.672620941  | 165.6566804 | 7.143319584  |
| 11       | 118    | 115.9626214 | 2.03737857   | 116.7109183 | 1.289081729  |
| 12       | 109.6  | 105.7873074 | 3.81269257   | 105.9438257 | 3.656174317  |
| 13       | 146.9  | 140.5834121 | 6.316587897  | 141.11185   | 5.788150026  |
| 14       | 155.9  | 148.4945151 | 7.405484865  | 148.8138305 | 7.086169509  |
| 15       | 104.5  | 100.0353286 | 4.464671429  | 101.4741989 | 3.025801109  |
| 16       | 150.6  | 148.1464396 | 2.45356042   | 148.6542713 | 1.945728684  |
| 17       | 27.4   | 29.32194173 | -1.92194173  | 26.28449807 | 1.115501932  |
| 18       | 119.9  | 123.6375159 | -3.73751591  | 120.4389889 | -0.538988868 |
| 19       | 135.3  | 136.0850876 | -0.785087565 | 138.2668705 | -2.96687047  |
| 20       | 26.2   | 23.41798208 | 2.782017919  | 24.22194949 | 1.978050514  |
| 21       | 18.8   | 13.76387633 | 5.036123673  | 15.74512203 | 3.054877968  |
| 22       | 26.9   | 22.25723924 | 4.642760763  | 27.18295412 | -0.282954119 |
| 23       | 22.4   | 24.90407446 | -2.504074458 | 21.96497509 | 0.435024907  |
| 24       | 30.1   | 28.95619253 | 1.143807474  | 28.07983428 | 2.020165723  |
| 25       | 124.6  | 124.665977  | -0.065977049 | 123.1662689 | 1.433731144  |
| 26       | 135.3  | 137.7778436 | -2.477843563 | 138.4558791 | -3.155879148 |
| 27       | 26.3   | 23.35207743 | 2.947922567  | 23.95473711 | 2.345262887  |
| 28       | 18.2   | 14.86143544 | 3.338564565  | 14.75536267 | 3.444637325  |
| 29       | 40     | 40.19201715 | -0.192017147 | 47.29568372 | -7.295683723 |
| 30       | 41.5   | 39.25795434 | 2.242045661  | 39.18978211 | 2.310217894  |
| 31       | 49.4   | 55.48506956 | -6.08506956  | 52.19257453 | -2.79257453  |
| 32       | 29.4   | 32.6322785  | -3.232278498 | 28.91860338 | 0.481396623  |
| 33       | 31.8   | 36.35831254 | -4.558312542 | 33.83795066 | -2.037950661 |
| 34       | 146.9  | 154.0700823 | -7.170082264 | 154.0611605 | -7.161160526 |
| 35       | 109.6  | 108.4724228 | 1.127577206  | 112.1694898 | -2.56948985  |
| 36       | 24.3   | 25.33857308 | -1.038573079 | 18.09625604 | 6.203743963  |
| 37       | 24.7   | 18.03349879 | 6.666501208  | 21.53652916 | 3.163470842  |
| 38       | 25.7   | 28.54980982 | -2.849809819 | 29.70329965 | -4.003299645 |

**Table S6.** Statistics of Ordinary Least Squares Linear Regression (OLS-LR) of

experimental and computed  $^{13}\text{C}$ -NMR chemical shifts.

| Compound   | CMAD <sup>a</sup> | CLAD <sup>b</sup> | $R^2$  | RMSD   | $F$      | $P$ value |
|------------|-------------------|-------------------|--------|--------|----------|-----------|
| <b>3a</b>  | 2.25              | 5.56              | 0.9978 | 2.9252 | 16494.21 | < 0.01    |
| <b>3b</b>  | 1.97              | 4.95              | 0.9983 | 2.594  | 20984.62 | < 0.01    |
| <b>7a</b>  | 2.09              | 5.29              | 0.998  | 2.5883 | 17675.72 | < 0.01    |
| <b>7b</b>  | 2.97              | 7.44              | 0.9961 | 3.5969 | 9135.65  | < 0.01    |
| <b>15a</b> | 2.7               | 7.35              | 0.9968 | 3.3928 | 11126.96 | < 0.01    |
| <b>15b</b> | 3.35              | 11.71             | 0.9947 | 4.3519 | 6748.84  | < 0.01    |
| <b>15c</b> | 3.53              | 11.36             | 0.9945 | 4.4132 | 6561.74  | < 0.01    |
| <b>15d</b> | 3.17              | 9.5               | 0.9955 | 4.0164 | 7929.88  | < 0.01    |

<sup>a</sup>CMAD = corrected mean absolute deviation, computed as  $(1/n) \sum_i^n |\delta_{\text{calc}} - \delta_{\text{exp}}|$ ,

where  $\delta_{\text{calc}}$  and  $\delta_{\text{exp}}$  refer to the calculated and experimental chemical shifts.

<sup>b</sup>CLAD = corrected largest absolute deviation, computed as  $\max(|\delta_{\text{calc}} - \delta_{\text{exp}}|)$ .

## 3.2 DP4+ analysis

### 3.2.1 DP4<sup>+</sup> analysis of compound **3** with two possible structures of **3a** and **3b**

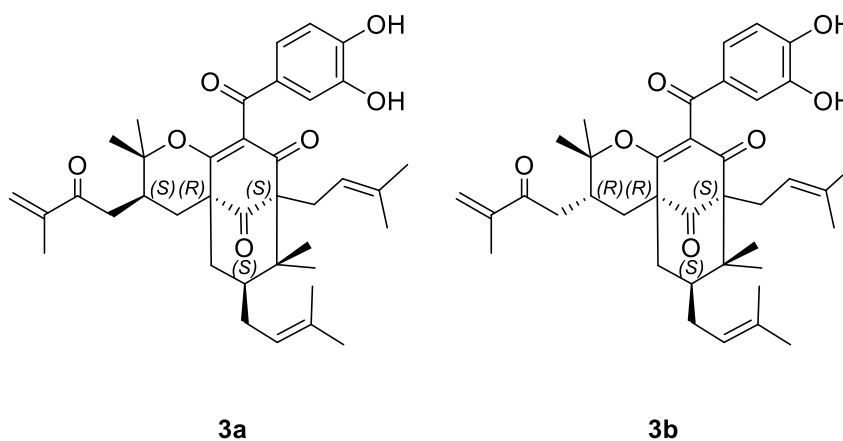

**Figure S60.** DP4+ probability for compounds **3a** and **3b** based on its  $^1\text{H}$  and  $^{13}\text{C}$ -NMR data.

| A                | B | C        | D        | E            | F        | G               | H        |
|------------------|---|----------|----------|--------------|----------|-----------------|----------|
| Functional       |   | Solvent? |          | Basis Set    |          | Type of Data    |          |
| mPW1PW91         |   | PCM      |          | 6-311G(d, p) |          | Unscaled Shifts |          |
|                  |   | Isomer 1 | Isomer 2 | Isomer 3     | Isomer 4 | Isomer 5        | Isomer 6 |
| sDP4+ (H data)   |   | 99.69%   |          | 0.31%        | —        | —               | —        |
| sDP4+ (C data)   |   | 0.01%    |          | 99.99%       | —        | —               | —        |
| sDP4+ (all data) |   | 3.59%    |          | 96.41%       | —        | —               | —        |
| uDP4+ (H data)   |   | 99.98%   |          | 0.02%        | —        | —               | —        |
| uDP4+ (C data)   |   | 9.47%    |          | 90.53%       | —        | —               | —        |
| uDP4+ (all data) |   | 99.81%   |          | 0.19%        | —        | —               | —        |
| DP4+ (H data)    |   | 100.00%  |          | 0.00%        | —        | —               | —        |
| DP4+ (C data)    |   | 0.00%    |          | 100.00%      | —        | —               | —        |
| DP4+ (all data)  |   | 95.25%   |          | 4.75%        | —        | —               | —        |



| Functional<br>mPW1PW91 |      | Solvent?<br>PCM |              | Basis Set<br>6-311G(d, p) |          | Type of Data<br>Unscaled Shifts |          |
|------------------------|------|-----------------|--------------|---------------------------|----------|---------------------------------|----------|
|                        |      | DP4+            | 95. 25%      | 4. 75%                    | –        | –                               | –        |
| Nuclei                 | sp2? | xperimenta      | Isomer 1     | Isomer 2                  | Isomer 3 | Isomer 4                        | Isomer 5 |
| C                      |      | 51. 4           | 53. 13227772 | 54. 2532464               |          |                                 |          |
| C                      | x    | 170. 9          | 181. 8959056 | 180. 773855               |          |                                 |          |
| C                      | x    | 126. 3          | 133. 3673547 | 130. 543085               |          |                                 |          |
| C                      | x    | 194. 3          | 204. 3041585 | 203. 719372               |          |                                 |          |
| C                      |      | 69              | 75. 31457016 | 75. 0081882               |          |                                 |          |
| C                      |      | 46. 7           | 54. 12057462 | 53. 8571158               |          |                                 |          |
| C                      |      | 47              | 49. 8586742  | 49. 7957382               |          |                                 |          |
| C                      |      | 39. 9           | 41. 90391464 | 39. 5036682               |          |                                 |          |
| C                      | x    | 206. 9          | 222. 6021363 | 222. 363605               |          |                                 |          |
| C                      | x    | 192. 3          | 201. 3446601 | 201. 667579               |          |                                 |          |
| C                      | x    | 131. 3          | 133. 4976306 | 133. 568817               |          |                                 |          |
| C                      | x    | 115. 9          | 116. 6694549 | 116. 605167               |          |                                 |          |
| C                      | x    | 146             | 149. 2381387 | 149. 224648               |          |                                 |          |
| C                      | x    | 151. 3          | 157. 0777185 | 157. 050073               |          |                                 |          |
| C                      | x    | 115. 6          | 117. 94859   | 117. 971693               |          |                                 |          |
| C                      | x    | 123. 6          | 132. 6559252 | 132. 452913               |          |                                 |          |
| C                      |      | 26. 4           | 28. 78651242 | 28. 7266488               |          |                                 |          |
| C                      | x    | 121. 6          | 127. 411826  | 127. 417903               |          |                                 |          |
| C                      | x    | 134. 2          | 146. 1202563 | 146. 032767               |          |                                 |          |
| C                      |      | 26. 4           | 28. 11213078 | 28. 1256166               |          |                                 |          |
| C                      |      | 18. 3           | 18. 89874536 | 18. 8920909               |          |                                 |          |
| C                      |      | 27              | 27. 22822792 | 27. 1287654               |          |                                 |          |
| C                      |      | 22. 8           | 22. 64032896 | 22. 5793543               |          |                                 |          |
| C                      |      | 29. 8           | 31. 9525315  | 31. 8387178               |          |                                 |          |
| C                      | x    | 126. 4          | 132. 4435862 | 132. 60255                |          |                                 |          |
| C                      | x    | 133. 3          | 145. 2902012 | 144. 844632               |          |                                 |          |
| C                      |      | 26. 2           | 28. 0188191  | 27. 9663457               |          |                                 |          |
| C                      |      | 18. 6           | 19. 21503572 | 19. 3588656               |          |                                 |          |
| C                      |      | 29. 3           | 36. 05218636 | 30. 9828102               |          |                                 |          |
| C                      |      | 38. 9           | 39. 6285031  | 39. 2744226               |          |                                 |          |
| C                      |      | 86              | 89. 29504008 | 89. 1670548               |          |                                 |          |
| C                      |      | 22. 2           | 29. 22246264 | 21. 608973                |          |                                 |          |
| C                      |      | 29              | 27. 04917908 | 28. 2655562               |          |                                 |          |
| C                      |      | 39. 7           | 48. 23073998 | 43. 891832                |          |                                 |          |
| C                      | x    | 199. 8          | 209. 8611147 | 206. 780998               |          |                                 |          |
| C                      | x    | 145. 5          | 149. 9425086 | 148. 47624                |          |                                 |          |
| C                      | x    | 125. 5          | 134. 1949359 | 134. 745854               |          |                                 |          |
| C                      |      | 17. 9           | 21. 22099962 | 21. 6443528               |          |                                 |          |
| H                      |      | 1. 52           | 1. 50218832  | 1. 44208576               |          |                                 |          |
| H                      |      | 2. 33           | 2. 61573684  | 2. 46849708               |          |                                 |          |
| H                      |      | 2. 02           | 1. 88938328  | 1. 6015906                |          |                                 |          |
| H                      | x    | 7. 39           | 7. 92662055  | 7. 91751916               |          |                                 |          |
| H                      | x    | 6. 84           | 7. 00962437  | 7. 02074368               |          |                                 |          |
| H                      | x    | 7. 14           | 7. 38992694  | 7. 42779128               |          |                                 |          |
| H                      |      | 2. 63           | 2. 36939502  | 2. 34917588               |          |                                 |          |
| H                      |      | 2. 43           | 2. 85364029  | 2. 82296492               |          |                                 |          |
| H                      | x    | 5. 01           | 5. 71623703  | 5. 7056932                |          |                                 |          |
| H                      |      | 1. 57           | 1. 42632556  | 1. 41180423               |          |                                 |          |
| H                      |      | 1. 56           | 1. 69446735  | 1. 69378995               |          |                                 |          |
| H                      |      | 0. 97           | 0. 98871364  | 0. 92632631               |          |                                 |          |
| H                      |      | 1. 14           | 1. 09651568  | 1. 08343903               |          |                                 |          |
| H                      |      | 2. 75           | 2. 90488696  | 2. 82684624               |          |                                 |          |
| H                      |      | 1. 29           | 1. 98916887  | 1. 96596612               |          |                                 |          |
| H                      | x    | 5. 01           | 5. 20499498  | 5. 16529228               |          |                                 |          |
| H                      |      | 1. 68           | 1. 74586395  | 1. 72549997               |          |                                 |          |
| H                      |      | 1. 69           | 1. 93372005  | 1. 88318365               |          |                                 |          |
| H                      |      | 3. 01           | 3. 10043546  | 2. 09296576               |          |                                 |          |
| H                      |      | 1. 19           | 1. 57676804  | 1. 5753682                |          |                                 |          |
| H                      |      | 2. 1            | 2. 11692666  | 2. 13610844               |          |                                 |          |
| H                      |      | 1. 3            | 0. 91074536  | 1. 3634688                |          |                                 |          |
| H                      |      | 0. 91           | 1. 107545    | 0. 8289926                |          |                                 |          |
| H                      |      | 2. 8            | 2. 76057616  | 3. 12451192               |          |                                 |          |
| H                      |      | 2. 73           | 2. 70644186  | 1. 76007532               |          |                                 |          |
| H                      | x    | 6. 09           | 6. 44078463  | 6. 61966796               |          |                                 |          |
| H                      | x    | 5. 88           | 5. 78419309  | 5. 81782316               |          |                                 |          |
| H                      |      | 1. 89           | 2. 09628222  | 2. 14276564               |          |                                 |          |

**3.2.2 DP4+ analysis of compound **7** with two possible structures of **7a** and **7b**.**

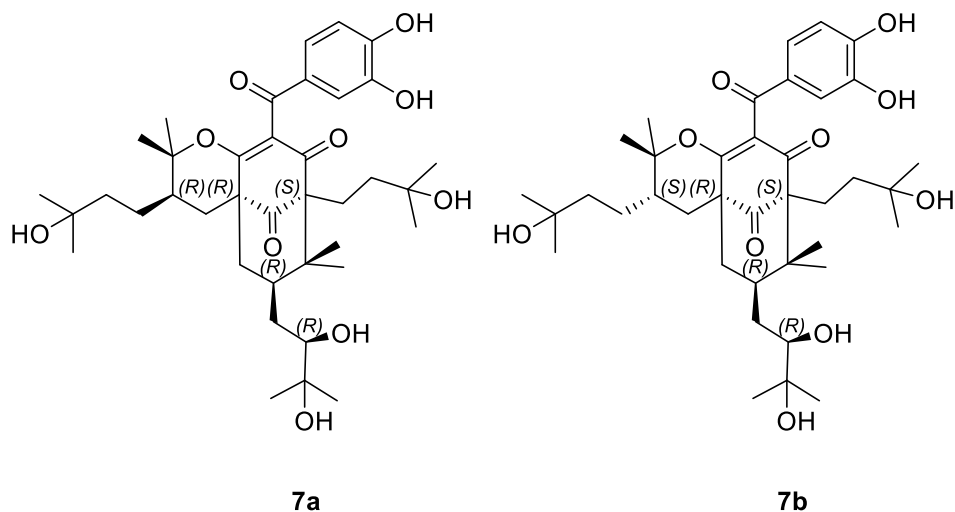

**Figure S61.** DP4+ probability for compounds **7a** and **7b** based on its <sup>1</sup>H and <sup>13</sup>C-NMR data.

| Functional       | Solvent? |          | Basis Set   |          | Type of Data    |          |
|------------------|----------|----------|-------------|----------|-----------------|----------|
| mPW1PW91         | PCM      |          | 6-311G(d,p) |          | Unscaled Shifts |          |
|                  | Isomer 1 | Isomer 2 | Isomer 3    | Isomer 4 | Isomer 5        | Isomer 6 |
| sDP4+ (H data)   | 100.00%  | 0.00%    | —           | —        | —               | —        |
| sDP4+ (C data)   | 100.00%  | 0.00%    | —           | —        | —               | —        |
| sDP4+ (all data) | 100.00%  | 0.00%    | —           | —        | —               | —        |
| uDP4+ (H data)   | 100.00%  | 0.00%    | —           | —        | —               | —        |
| uDP4+ (C data)   | 100.00%  | 0.00%    | —           | —        | —               | —        |
| uDP4+ (all data) | 100.00%  | 0.00%    | —           | —        | —               | —        |
| DP4+ (H data)    | 100.00%  | 0.00%    | —           | —        | —               | —        |
| DP4+ (C data)    | 100.00%  | 0.00%    | —           | —        | —               | —        |
| DP4+ (all data)  | 100.00%  | 0.00%    | —           | —        | —               | —        |

| Functional<br>mPW1PW91 |      | Solvent?<br>PCM |             | Basis Set<br>6-311G(d, p) |          | Type of Data<br>Unscaled Shifts |          |
|------------------------|------|-----------------|-------------|---------------------------|----------|---------------------------------|----------|
|                        |      | DP4+            | 100. 00%    | 0. 00%                    | –        | –                               | –        |
| Nuclei                 | sp2? | xperimenta      | Isomer 1    | Isomer 2                  | Isomer 3 | Isomer 4                        | Isomer 5 |
| C                      |      | 53              | 53. 9690859 | 57. 5198                  |          |                                 |          |
| C                      | x    | 174             | 183. 047284 | 183. 6195                 |          |                                 |          |
| C                      | x    | 127. 1          | 133. 308471 | 127. 7982                 |          |                                 |          |
| C                      | x    | 196. 8          | 205. 528264 | 202. 0657                 |          |                                 |          |
| C                      |      | 69. 6           | 74. 2432721 | 77. 1092                  |          |                                 |          |
| C                      |      | 47. 7           | 54. 4613782 | 55. 2826                  |          |                                 |          |
| C                      |      | 43. 5           | 45. 2495553 | 40. 7069                  |          |                                 |          |
| C                      |      | 40. 3           | 42. 9371234 | 41. 5924                  |          |                                 |          |
| C                      | x    | 208. 2          | 222. 087544 | 221. 5785                 |          |                                 |          |
| C                      | x    | 194. 8          | 202. 590474 | 205. 5449                 |          |                                 |          |
| C                      | x    | 131             | 133. 937513 | 133. 6257                 |          |                                 |          |
| C                      | x    | 116. 7          | 116. 752656 | 116. 8367                 |          |                                 |          |
| C                      | x    | 146. 8          | 149. 680443 | 149. 5186                 |          |                                 |          |
| C                      | x    | 153. 1          | 157. 384199 | 157. 7004                 |          |                                 |          |
| C                      | x    | 116             | 117. 974103 | 118. 146                  |          |                                 |          |
| C                      | x    | 124. 4          | 132. 708564 | 134. 5244                 |          |                                 |          |
| C                      |      | 22. 8           | 24. 0821747 | 23. 9381                  |          |                                 |          |
| C                      |      | 39. 8           | 37. 874898  | 39. 5834                  |          |                                 |          |
| C                      |      | 71. 9           | 74. 7217839 | 75. 6546                  |          |                                 |          |
| C                      |      | 29. 2           | 33. 7895543 | 29. 09                    |          |                                 |          |
| C                      |      | 29. 2           | 27. 672201  | 29. 2991                  |          |                                 |          |
| C                      |      | 27. 2           | 26. 9674723 | 22. 5876                  |          |                                 |          |
| C                      |      | 23. 1           | 22. 9216039 | 16. 0951                  |          |                                 |          |
| C                      |      | 33. 5           | 33. 5278981 | 37. 1257                  |          |                                 |          |
| C                      |      | 78. 6           | 77. 7035113 | 78. 4924                  |          |                                 |          |
| C                      |      | 74. 4           | 78. 9669863 | 77. 37                    |          |                                 |          |
| C                      |      | 24. 6           | 26. 9843783 | 21. 2575                  |          |                                 |          |
| C                      |      | 25. 9           | 23. 1852007 | 31. 8334                  |          |                                 |          |
| C                      |      | 29. 2           | 27. 619391  | 27. 2781                  |          |                                 |          |
| C                      |      | 45              | 43. 0664595 | 37. 6193                  |          |                                 |          |
| C                      |      | 89. 2           | 89. 3065007 | 92. 2262                  |          |                                 |          |
| C                      |      | 21. 7           | 27. 0212714 | 22. 8207                  |          |                                 |          |
| C                      |      | 29. 1           | 29. 192854  | 27. 8995                  |          |                                 |          |
| C                      |      | 26. 6           | 25. 7423797 | 29. 9449                  |          |                                 |          |
| C                      |      | 42. 8           | 41. 768125  | 37. 5764                  |          |                                 |          |
| C                      |      | 71. 4           | 74. 5622368 | 76. 7993                  |          |                                 |          |
| C                      |      | 29. 3           | 33. 4310561 | 27. 2505                  |          |                                 |          |
| C                      |      | 29. 7           | 27. 8377788 | 34. 1113                  |          |                                 |          |
| H                      |      | 1. 82           | 1. 98661068 | 2. 8068                   |          |                                 |          |
| H                      |      | 2. 28           | 2. 31049742 | 2. 9715                   |          |                                 |          |
| H                      |      | 2. 2            | 2. 59843845 | 1. 3269                   |          |                                 |          |
| H                      | x    | 7. 22           | 7. 94850965 | 7. 9473                   |          |                                 |          |
| H                      | x    | 6. 76           | 7. 09596129 | 7. 1079                   |          |                                 |          |
| H                      | x    | 7. 1            | 7. 51289634 | 7. 6052                   |          |                                 |          |
| H                      |      | 1. 89           | 1. 98931041 | 1. 71865                  |          |                                 |          |
| H                      |      | 1. 43           | 1. 71355126 | 1. 3712                   |          |                                 |          |
| H                      |      | 1. 08           | 0. 8729254  | 1. 1985                   |          |                                 |          |
| H                      |      | 1. 16           | 1. 15366845 | 1. 0847                   |          |                                 |          |
| H                      |      | 1. 17           | 1. 05657923 | 1. 22923333               |          |                                 |          |
| H                      |      | 1. 02           | 0. 98618192 | 0. 67986667               |          |                                 |          |
| H                      |      | 1. 14           | 1. 08750249 | 0. 9738                   |          |                                 |          |
| H                      |      | 2. 16           | 2. 23149484 | 1. 6747                   |          |                                 |          |
| H                      |      | 1. 44           | 2. 15120515 | 1. 3456                   |          |                                 |          |
| H                      |      | 3. 18           | 3. 58199748 | 3. 849                    |          |                                 |          |
| H                      |      | 1. 21           | 1. 43437822 | 1. 20943333               |          |                                 |          |
| H                      |      | 1. 22           | 1. 16905403 | 1. 23756667               |          |                                 |          |
| H                      |      | 3. 13           | 2. 88301274 | 1. 9804                   |          |                                 |          |
| H                      |      | 1. 09           | 1. 60966175 | 1. 6423                   |          |                                 |          |
| H                      |      | 1. 27           | 1. 78920423 | 3. 0408                   |          |                                 |          |
| H                      |      | 1. 29           | 1. 08564139 | 0. 94443333               |          |                                 |          |
| H                      |      | 0. 95           | 1. 20709479 | 1. 3801                   |          |                                 |          |
| H                      |      | 1. 52           | 1. 70446732 | 1. 747                    |          |                                 |          |
| H                      |      | 1. 09           | 1. 68051331 | 1. 1997                   |          |                                 |          |
| H                      |      | 1. 8            | 2. 04278535 | 1. 9276                   |          |                                 |          |
| H                      |      | 1. 42           | 1. 33627864 | 1. 449                    |          |                                 |          |
| H                      |      | 1. 22           | 1. 23273651 | 1. 235                    |          |                                 |          |
| H                      |      | 1. 22           | 1. 22473469 | 1. 1873                   |          |                                 |          |
|                        |      |                 |             |                           |          |                                 |          |
|                        |      |                 |             |                           |          |                                 |          |
|                        |      |                 |             |                           |          |                                 |          |

**3.2.3 DP4+ analysis of compound **15** with two possible structures of **15a,15b,15c** and **15d**.**

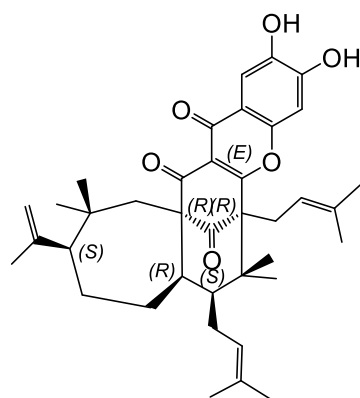

**15a**

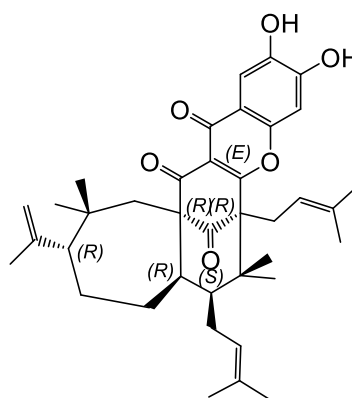

**15b**

**(DP4<sup>+</sup>: 100.00%)-15a**

**(DP4<sup>+</sup>: 0.00%)-15b**

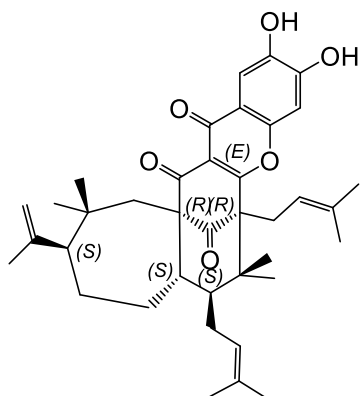

**15c**

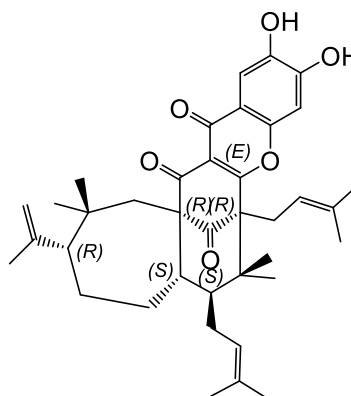

**15d**

**(DP4<sup>+</sup>: 0.00%)-15c**

**(DP4<sup>+</sup>: 0.00%)-15d**

**Figure S62.** DP4+ probability for compounds **15a,15b,15c** and **15d** based on its <sup>1</sup>H and <sup>13</sup>C-NMR data.

| A                | B | C                                                                                         | D                                                                                         | E                                                                                       | F                                                                                       | G               | H        |
|------------------|---|-------------------------------------------------------------------------------------------|-------------------------------------------------------------------------------------------|-----------------------------------------------------------------------------------------|-----------------------------------------------------------------------------------------|-----------------|----------|
| Functional       |   | Solvent?                                                                                  |                                                                                           | Basis Set                                                                               |                                                                                         | Type of Data    |          |
| mPW1PW91         |   | PCM                                                                                       |                                                                                           | 6-311G(d, p)                                                                            |                                                                                         | Unscaled Shifts |          |
|                  |   | Isomer 1                                                                                  | Isomer 2                                                                                  | Isomer 3                                                                                | Isomer 4                                                                                | Isomer 5        | Isomer 6 |
| sDP4+ (H data)   |   |  0.10%   |  99.90%  |  0.00% |  0.00% | –               | –        |
| sDP4+ (C data)   |   |  100.00% |  0.00%   |  0.00% |  0.00% | –               | –        |
| sDP4+ (all data) |   |  100.00% |  0.00%   |  0.00% |  0.00% | –               | –        |
| uDP4+ (H data)   |   |  0.00%   |  100.00% |  0.00% |  0.00% | –               | –        |
| uDP4+ (C data)   |   |  100.00% |  0.00%   |  0.00% |  0.00% | –               | –        |
| uDP4+ (all data) |   |  99.50%  |  0.50%   |  0.00% |  0.00% | –               | –        |
| DP4+ (H data)    |   |  0.00%   |  100.00% |  0.00% |  0.00% | –               | –        |
| DP4+ (C data)    |   |  100.00% |  0.00%   |  0.00% |  0.00% | –               | –        |
| DP4+ (all data)  |   |  100.00% |  0.00%   |  0.00% |  0.00% | –               | –        |

| Functional<br>mPW1PW91 |      | Solvent?<br>PCM |            | Basis Set<br>6-311G(d, p) |            | Type of Data<br>Unscaled Shifts |          |
|------------------------|------|-----------------|------------|---------------------------|------------|---------------------------------|----------|
|                        |      | DP4+            | 100.00%    | 0.00%                     | 0.00%      | 0.00%                           | —        |
| Nuclei                 | sp2? | xperimenta      | Isomer 1   | Isomer 2                  | Isomer 3   | Isomer 4                        | Isomer 5 |
| C                      |      | 66.3            | 74.1842    | 74.1427526                | 72.290804  | 70.9106                         |          |
| C                      | x    | 193.1           | 201.6946   | 203.445775                | 206.50087  | 200.2891                        |          |
| C                      | x    | 119.2           | 125.2161   | 125.172956                | 123.22386  | 123.0563                        |          |
| C                      | x    | 177             | 187.5571   | 186.913262                | 187.803237 | 178.8595                        |          |
| C                      |      | 63.6            | 68.5952    | 69.0911925                | 67.9022363 | 66.0561                         |          |
| C                      |      | 48.8            | 57.4216    | 56.7330756                | 57.3812674 | 54.0806                         |          |
| C                      |      | 47.3            | 57.207     | 58.173141                 | 61.3484365 | 59.1243                         |          |
| C                      |      | 38.2            | 48.851     | 54.1568275                | 55.1480102 | 46.8327                         |          |
| C                      | x    | 207.7           | 218.9536   | 221.288322                | 219.903496 | 215.3319                        |          |
| C                      | x    | 172.8           | 175.8604   | 175.501707                | 175.874349 | 169.6505                        |          |
| C                      | x    | 118             | 123.064    | 123.111736                | 123.33601  | 119.956                         |          |
| C                      | x    | 109.6           | 112.9052   | 112.856573                | 112.887527 | 109.0242                        |          |
| C                      | x    | 146.9           | 148.5941   | 148.419714                | 148.617776 | 144.7302                        |          |
| C                      | x    | 155.9           | 156.8409   | 156.658139                | 156.741262 | 152.55                          |          |
| C                      | x    | 104.5           | 107.0804   | 107.493114                | 106.98113  | 104.4862                        |          |
| C                      | x    | 150.6           | 156.1792   | 156.098703                | 156.383842 | 152.388                         |          |
| C                      |      | 27.4            | 29.9269    | 30.0827096                | 34.3693551 | 28.1463                         |          |
| C                      | x    | 119.9           | 125.1842   | 126.97099                 | 131.216947 | 123.7411                        |          |
| C                      | x    | 135.3           | 147.5138   | 145.047754                | 143.998689 | 141.8417                        |          |
| C                      |      | 26.2            | 28.0435    | 27.6854068                | 28.3068964 | 26.0522                         |          |
| C                      |      | 18.8            | 20.0618    | 19.5372077                | 18.3936144 | 17.4457                         |          |
| C                      |      | 26.9            | 28.3968    | 26.6261133                | 27.114992  | 29.0585                         |          |
| C                      |      | 22.4            | 24.2058    | 25.2032178                | 29.8328848 | 23.7607                         |          |
| C                      |      | 30.1            | 30.4484    | 28.512604                 | 33.9937869 | 29.9691                         |          |
| C                      | x    | 124.6           | 135.2599   | 135.624859                | 132.273018 | 126.5101                        |          |
| C                      | x    | 135.3           | 140.3834   | 140.168806                | 145.736889 | 142.0336                        |          |
| C                      |      | 26.3            | 27.5396    | 27.5004813                | 28.2392225 | 25.7809                         |          |
| C                      |      | 18.2            | 18.4792    | 18.3438199                | 19.5206388 | 16.4408                         |          |
| C                      |      | 40              | 40.0365    | 45.8739288                | 45.531251  | 49.4789                         |          |
| C                      |      | 41.5            | 43.3813    | 44.0545433                | 44.5721122 | 41.249                          |          |
| C                      |      | 49.4            | 54.845     | 62.120393                 | 61.2348642 | 54.4507                         |          |
| C                      |      | 29.4            | 28.5795    | 37.1046602                | 37.7685619 | 30.8207                         |          |
| C                      |      | 31.8            | 31.3594    | 30.8474679                | 41.5946259 | 35.8153                         |          |
| C                      | x    | 146.9           | 160.1317   | 162.287384                | 162.466513 | 157.8776                        |          |
| C                      | x    | 109.6           | 117.8673   | 115.891518                | 115.644728 | 115.3451                        |          |
| C                      |      | 24.3            | 22.9417    | 27.4092368                | 30.279048  | 19.8328                         |          |
| C                      |      | 24.7            | 30.3267    | 21.1993565                | 22.7778601 | 23.3257                         |          |
| C                      |      | 25.7            | 30.5525    | 34.5604589                | 33.5764944 | 31.6174                         |          |
| H                      |      | 1.56            | 1.3865     | 1.4936471                 | 1.35975196 | 1.1223                          |          |
| H                      |      | 2.11            | 2.7779     | 2.7603247                 | 2.94723184 | 2.6314                          |          |
| H                      | x    | 8.1             | 7.8417     | 7.78837504                | 7.83292473 | 7.2827                          |          |
| H                      | x    | 7.45            | 7.2789     | 7.23967738                | 7.34704698 | 6.809                           |          |
| H                      |      | 3.02            | 2.97415    | 2.99215273                | 2.98722277 | 2.49185                         |          |
| H                      | x    | 5.04            | 5.1035     | 5.34012692                | 6.57849535 | 5.0441                          |          |
| H                      |      | 1.37            | 1.50406667 | 1.45840152                | 1.81849331 | 1.44383333                      |          |
| H                      |      | 1.78            | 1.86833333 | 1.83123481                | 1.91972629 | 1.12186667                      |          |
| H                      |      | 1.15            | 1.23986667 | 1.22151641                | 1.18723009 | 0.75453333                      |          |
| H                      |      | 1.27            | 1.3869     | 1.19481852                | 1.06628281 | 0.84513333                      |          |
| H                      |      | 2.09            | 1.6926     | 1.89373614                | 2.0123687  | 1.2039                          |          |
| H                      |      | 1.97            | 1.9176     | 1.7625388                 | 2.16768009 | 1.8646                          |          |
| H                      | x    | 5.01            | 5.0699     | 5.12975576                | 5.11609445 | 5.2355                          |          |
| H                      |      | 1.64            | 1.42673333 | 1.55699063                | 1.72628203 | 1.18406667                      |          |
| H                      |      | 1.51            | 1.56236667 | 1.23601206                | 1.57521188 | 1.35773333                      |          |
| H                      |      | 2.39            | 2.5059     | 2.2746848                 | 2.79595125 | 1.5548                          |          |
| H                      |      | 2.13            | 1.7607     | 2.1372109                 | 1.22589032 | 1.3453                          |          |
| H                      |      | 2.48            | 2.279      | 2.15483918                | 1.81138351 | 2.3058                          |          |
| H                      |      | 2.23            | 2.0688     | 1.737862                  | 1.6693914  | 1.4435                          |          |
| H                      |      | 1.91            | 1.4441     | 1.58370682                | 1.54885735 | 1.0725                          |          |
| H                      |      | 2.29            | 1.7983     | 2.1987156                 | 1.57725916 | 1.686                           |          |
| H                      |      | 2.21            | 1.2364     | 1.28893054                | 1.37061187 | 0.8684                          |          |
| H                      | x    | 4.8             | 5.0516     | 5.13115612                | 5.20386464 | 4.6839                          |          |
| H                      | x    | 4.9             | 4.8931     | 4.92063532                | 4.88295148 | 4.8121                          |          |
| H                      |      | 1.65            | 1.78716667 | 1.84834153                | 1.87067646 | 1.42676667                      |          |
| H                      |      | 1.01            | 1.0911     | 1.01722958                | 1.24528838 | 0.8582                          |          |
| H                      |      | 1.2             | 0.8571     | 1.05279026                | 0.84042198 | 0.49056667                      |          |
|                        |      |                 |            |                           |            |                                 |          |
|                        |      |                 |            |                           |            |                                 |          |



## 4.Experimental and calculated ECD spectra

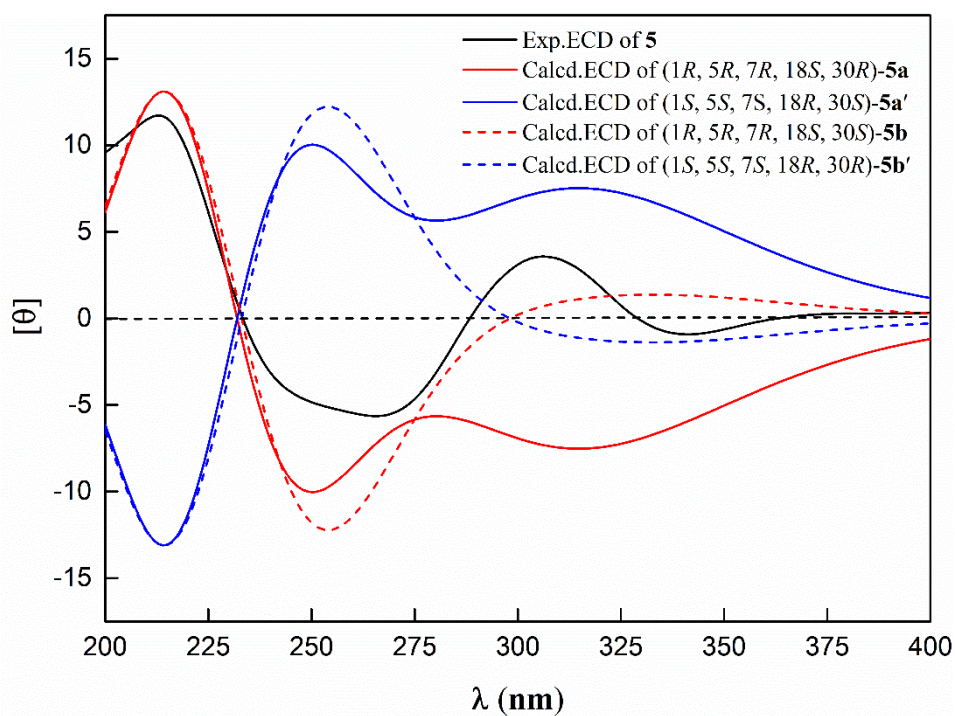

**Figure S63.** Calculated ECD spectra of compound **5** was compared with the experimental.

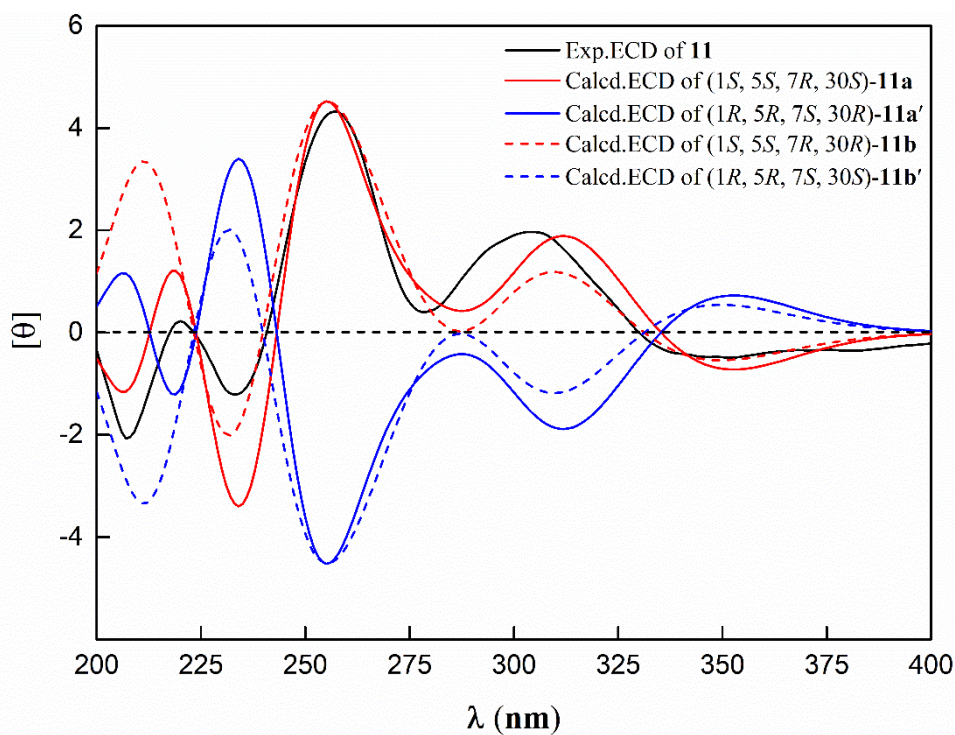

**Figure S64.** Calculated ECD spectra of compound **11** was compared with the experimental.

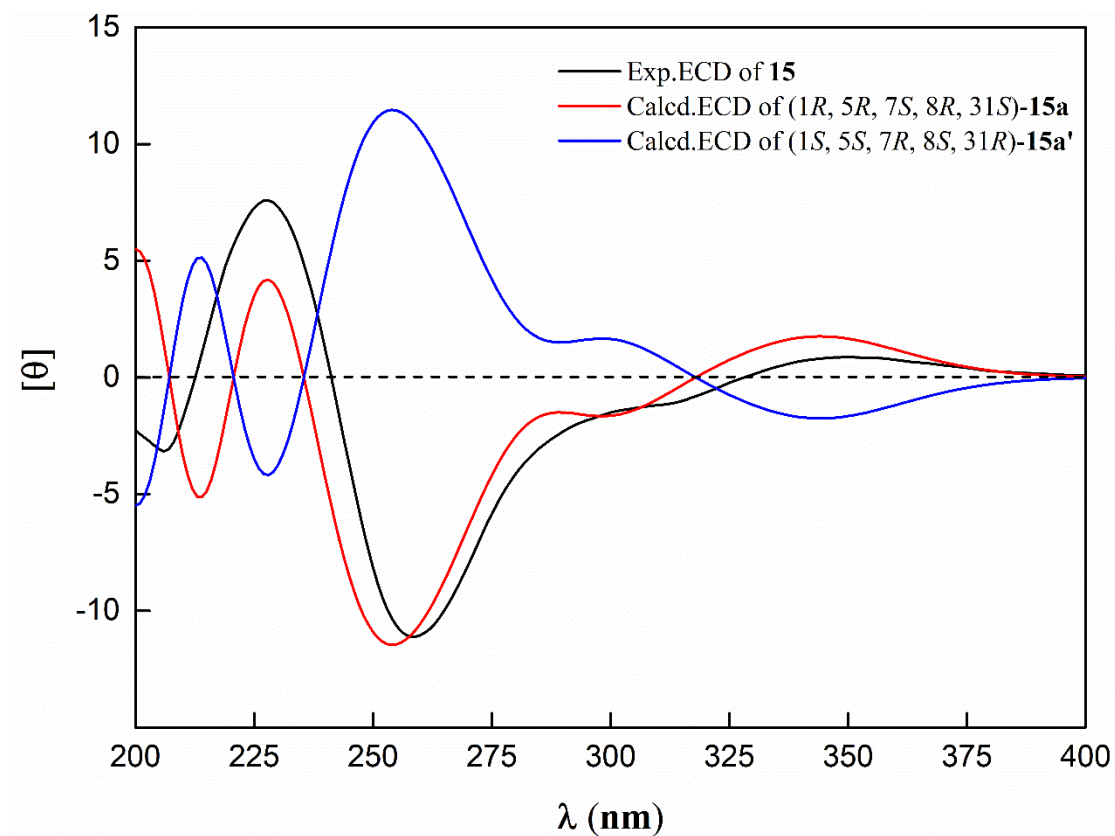

**Figure S65.** Calculated ECD spectra of compound **15** was compared with the experimental.



**Table S7.**  $^1\text{H}$ -NMR and  $^{13}\text{C}$ -NMR of compounds **1-2** (in pyridine- $d_5$ )

| No. | $^{13}\text{C}$ -NMR |          | $^1\text{H}$ -NMR   |                     |
|-----|----------------------|----------|---------------------|---------------------|
|     | <b>1</b>             | <b>2</b> | <b>1</b>            | <b>2</b>            |
| 1   | 53.8                 | 54.0     |                     |                     |
| 2   | 170.8                | 170.8    |                     |                     |
| 3   | 129.1                | 129.2    |                     |                     |
| 4   | 195.0                | 195.0    |                     |                     |
| 5   | 71.3                 | 71.3     |                     |                     |
| 6   | 46.7                 | 46.7     |                     |                     |
| 7   | 43.7                 | 42.6     | 2.43 m              | 2.41 m              |
| 8   | 42.9                 | 42.7     | 2.43 m, 1.75 m      | 2.41 m, 1.73 m      |
| 9   | 207.3                | 207.2    |                     |                     |
| 10  | 193.2                | 193.1    |                     |                     |
| 11  | 130.8                | 130.8    |                     |                     |
| 12  | 116.8                | 116.7    | 8.14 s              | 8.14 s              |
| 13  | 147.9                | 147.9    |                     |                     |
| 14  | 153.7                | 153.7    |                     |                     |
| 15  | 116.4                | 116.3    | 7.29 d (8.0)        | 7.26 d (8.5)        |
| 16  | 123.4                | 124.3    | 7.76 d (8.0)        | 7.68 m              |
| 17  | 25.9                 | 25.8     | 2.77 dd (14.0, 6.0) | 2.78 dd (13.5, 6.0) |
|     |                      |          | 2.97 dd (14.0, 7.5) | 2.96 dd (13.5, 7.5) |
| 18  | 121.9                | 121.9    | 5.39 br s           | 5.40 br s           |
| 19  | 134.2                | 134.2    |                     |                     |
| 20  | 18.7                 | 18.3     | 1.72 s 3H           | 1.76 s 3H           |
| 21  | 26.5                 | 26.6     | 1.55 s 3H           | 1.60 s 3H           |
| 22  | 16.5                 | 16.5     | 0.82 s 3H           | 0.87 s 3H           |
| 23  | 22.7                 | 22.7     | 1.26 s 3H           | 1.26 s 3H           |
| 24  | 28.3                 | 28.4     | 2.24 m, 1.82 m      | 2.24 m, 1.83 m      |
| 25  | 122.8                | 123.7    | 5.11 br s           | 5.10 s              |
| 26  | 133.5                | 134.2    |                     |                     |
| 27  | 18.3                 | 18.7     | 1.61 s 3H           | 1.62 s 3H           |
| 28  | 26.1                 | 26.1     | 1.61 s 3H           | 1.62 s 3H           |
| 29  | 28.5                 | 27.9     | 3.25 dd (14.5, 3.5) | 3.20 dd (14.0, 3.0) |
|     |                      |          | 1.17 t (14.0)       | 1.10 m              |
| 30  | 43.7                 | 42.7     | 1.65 m              | 1.53 m              |
| 31  | 87.5                 | 87.8     |                     |                     |
| 32  | 21.6                 | 21.5     | 1.12 s 3H           | 1.09 s 3H           |
| 33  | 29.1                 | 28.9     | 1.08 s 3H           | 1.03 s 3H           |
| 34  | 30.2                 | 29.1     | 1.94 m, 1.80 m      | 1.38 m, 1.10 m      |
| 35  | 122.8                | 35.9     | 5.11 br s           | 2.24 m, 1.95 m      |
| 36  | 133.7                | 145.6    |                     |                     |
| 37  | 26.2                 | 115.5    | 1.68 s 3H           | 4.87 d (7.0)        |
|     |                      |          |                     | 4.86 d (7.0)        |
| 38  | 18.2                 | 22.7     | 1.55 s 3H           | 1.67 s 3H           |

**Table S8.** <sup>1</sup>H-NMR and <sup>13</sup>C-NMR of compound **4** (in pyridine-*d*<sub>5</sub>)

| No | <sup>13</sup> C-NMR | <sup>1</sup> H-NMR                     | No | <sup>13</sup> C-NMR | <sup>1</sup> H-NMR               |
|----|---------------------|----------------------------------------|----|---------------------|----------------------------------|
| 1  | 59.9                |                                        | 20 | 26.5                | 1.67 (3H, s)                     |
| 2  | 191.5               |                                        | 21 | 19.0                | 1.65 (3H, s)                     |
| 3  | 119.3               |                                        | 22 | 27.6                | 1.12 (3H, s)                     |
| 4  | 190.3               |                                        | 23 | 23.6                | 1.39 (3H, s)                     |
| 5  | 68.1                |                                        | 24 | 30.4                | 2.18 (2H, m)                     |
| 6  | 48.9                |                                        | 25 | 125.0               | 4.89 (1H, m)                     |
| 7  | 47.6                | 1.46 (1H, m)                           | 26 | 132.6               |                                  |
| 8  | 43.0                | 2.26 (2H, br d, <i>J</i> = 13.8Hz)     | 27 | 26.3                | 1.66 (3H, s)                     |
| 9  | 211.1               |                                        | 28 | 19.1                | 1.65 (3H, s)                     |
| 10 | 196.2               |                                        | 29 | 37.7                | 2.27 (2H, m)                     |
| 11 | 130.7               |                                        | 30 | 41.0                | 2.47 (1H, m)                     |
| 12 | 117.7               | 7.90 (1H, d, <i>J</i> = 2.0 Hz)        | 31 | 149.8               |                                  |
| 13 | 147.0               |                                        | 32 | 113.3               | 4.32 (2H, br s)                  |
| 14 | 153.3               |                                        | 33 | 18.8                | 1.63 (3H, s)                     |
| 15 | 116.2               | 7.23 (1H, d, <i>J</i> = 8.0 Hz)        | 34 | 40.5                | 1.62 (2H, m)                     |
| 16 | 126.3               | 7.74 (1H, dd, <i>J</i> = 8.0, 2.0 Hz)  | 35 | 73.3                | 3.69 (1H, t, <i>J</i> = 7.1 Hz ) |
| 17 | 26.8                | 2.73 (2H, dd, <i>J</i> = 13.2, 9.0 Hz) | 36 | 149.2               |                                  |
| 18 | 122.3               | 5.05 (1H, m)                           | 37 | 109.7               | 4.89 (2H, br s)                  |
| 19 | 133.9               |                                        | 38 | 18.5                | 1.93 (3H, s)                     |

**Table S9.** <sup>1</sup>H-NMR and <sup>13</sup>C-NMR of compound **6** (in pyridine-*d*<sub>5</sub>)

| No | <sup>13</sup> C-NMR | <sup>1</sup> H-NMR                                                           | No | <sup>13</sup> C-NMR | <sup>1</sup> H-NMR             |
|----|---------------------|------------------------------------------------------------------------------|----|---------------------|--------------------------------|
| 1  | 61.4                |                                                                              | 20 | 26.2                | 1.28 (3H, s)                   |
| 2  | 195.1               |                                                                              | 21 | 26.3                | 1.29 (3H, s)                   |
| 3  | 118.6               |                                                                              | 22 | 27.5                | 1.18 (3H, s)                   |
| 4  | 175.6               |                                                                              | 23 | 24.0                | 1.21 (3H, s)                   |
| 5  | 68.4                |                                                                              | 24 | 30.7                | 3.10 (1H, m); 2.63 (1H, m)     |
| 6  | 48.0                |                                                                              | 25 | 126.3               | 5.06 (1H, t, <i>J</i> = 7.0Hz) |
| 7  | 46.3                | 1.71 (1H, m)                                                                 | 26 | 133.3               |                                |
| 8  | 42.2                | 2.40 (1H, m); 2.21 (1H, m)                                                   | 27 | 18.4                | 1.81 (3H, s)                   |
| 9  | 208.6               |                                                                              | 28 | 26.4                | 1.67 (3H, s)                   |
| 10 | 191.8               |                                                                              | 29 | 37.5                | 2.25 (1H, m); 2.08 (1H, m)     |
| 11 | 131.3               |                                                                              | 30 | 44.2                | 2.84 (1H, m)                   |
| 12 | 116.9               | 8.15 (1H, d, <i>J</i> = 2.0 Hz)                                              | 31 | 148.5               |                                |
| 13 | 147.7               |                                                                              | 32 | 113.7               | 4.86 (1H, s); 4.80 (1H, s)     |
| 14 | 153.9               |                                                                              | 33 | 18.4                | 1.67 (3H, s)                   |
| 15 | 116.1               | 7.24 (1H, d, <i>J</i> = 8.5 Hz)                                              | 34 | 32.5                | 1.68 (1H, m); 1.63 (1H, m)     |
| 16 | 125.6               | 7.81 (1H, dd, <i>J</i> = 8.5, 2.0 Hz)                                        | 35 | 36.3                | 1.96 (1H, m); 1.90 (1H, m)     |
| 17 | 27.4                | 3.20 (1H, dd, <i>J</i> = 14, 9.5 Hz)<br>2.46 (1H, dd, <i>J</i> = 14, 6.5 Hz) | 36 | 146.7               |                                |
| 18 | 93.7                | 4.78 (1H, br s)                                                              | 37 | 23.3                | 1.69 (3H, s)                   |
| 19 | 71.0                |                                                                              | 38 | 110.4               | 4.83 (1H, s); 4.76 (1H, s)     |

**Table S10.** <sup>1</sup>H-NMR and <sup>13</sup>C-NMR of compounds **9** and **10** (in pyridine-*d*<sub>5</sub>)

| No | 9                   |                                        | 10                  |                                        |
|----|---------------------|----------------------------------------|---------------------|----------------------------------------|
|    | <sup>13</sup> C-NMR | <sup>1</sup> H-NMR                     | <sup>13</sup> C-NMR | <sup>1</sup> H-NMR                     |
| 1  | 52.2                |                                        | 52.6                |                                        |
| 2  | 171.1               |                                        | 171.1               |                                        |
| 3  | 127.1               |                                        | 127.1               |                                        |
| 4  | 195.0               |                                        | 195.0               |                                        |
| 5  | 69.4                |                                        | 69.4                |                                        |
| 6  | 46.8                |                                        | 48.0                |                                        |
| 7  | 43.1                | 2.29 (1H, m)                           | 43.7                | 2.29 (1H, m)                           |
| 8  | 40.2                | 2.28 (1H, m)                           | 45.4                | 2.28 (1H, m)                           |
|    |                     | 2.58 (1H, br d, <i>J</i> = 13.3Hz)     |                     | 2.58 (1H, br d, <i>J</i> = 13.3Hz)     |
| 9  | 207.9               |                                        | 207.9               |                                        |
| 10 | 193.5               |                                        | 193.5               |                                        |
| 11 | 130.7               |                                        | 130.7               |                                        |
| 12 | 116.5               | 8.07 (1H, d, <i>J</i> = 2.0Hz)         | 116.5               | 8.09 (1H, d, <i>J</i> = 2.0Hz)         |
| 13 | 147.7               |                                        | 147.7               |                                        |
| 14 | 153.8               |                                        | 153.8               |                                        |
| 15 | 116.6               | 7.27 (1H, d, <i>J</i> = 8.5Hz)         | 116.6               | 7.28 (1H, d, <i>J</i> = 8.0Hz)         |
| 16 | 125.4               | 7.71 (1H, dd, <i>J</i> = 2.0, 8.5Hz)   | 125.4               | 7.71 (1H, dd, <i>J</i> = 2.0, 8.0Hz)   |
| 17 | 26.6                | 2.78 (1H, m)                           | 26.6                | 2.78 (1H, m)                           |
|    |                     | 2.95 (1H, dd, <i>J</i> = 13.5, 7.4Hz)  |                     | 2.95 (1H, dd, <i>J</i> = 13.5, 7.4Hz)  |
| 18 | 121.7               | 5.41 (1H, br t, <i>J</i> = 6.1Hz)      | 121.7               | 5.42 (1H, br t, <i>J</i> = 6.1Hz)      |
| 19 | 134.2               |                                        | 134.2               |                                        |
| 20 | 26.5                | 1.57 (3H, s)                           | 26.5                | 1.57 (3H, s)                           |
| 21 | 18.7                | 1.71 (3H, s)                           | 18.7                | 1.71 (3H, s)                           |
| 22 | 27.2                | 1.08 (3H, s)                           | 27.2                | 1.08 (3H, s)                           |
| 23 | 23.1                | 1.43 (3H, s)                           | 23.1                | 1.43 (3H, s)                           |
| 24 | 33.6                | 2.80 (1H, m)                           | 33.6                | 2.80 (1H, m)                           |
|    |                     | 2.05 (1H, dd, <i>J</i> = 13.9, 11.4Hz) |                     | 2.05 (1H, dd, <i>J</i> = 13.9, 11.4Hz) |
| 25 | 78.5                | 3.80 (1H, br d, <i>J</i> = 10.4Hz)     | 83.0                | 3.68 (1H, br d, <i>J</i> = 10.4Hz)     |
| 26 | 73.2                |                                        | 73.2                |                                        |
| 27 | 27.1                | 1.74 (3H, s)                           | 27.1                | 1.74 (3H, s)                           |
| 28 | 25.0                | 1.66 (3H, s)                           | 25.0                | 1.66 (3H, s)                           |
| 29 | 29.3                | 1.14 (1H, m)                           | 29.3                | 1.14 (1H, m)                           |
|    |                     | 3.30 (1H, dd, <i>J</i> = 14.3, 3.3Hz)  |                     | 3.25 (1H, dd, <i>J</i> = 14.3, 3.3Hz)  |
| 30 | 43.8                | 1.67 (1H, m)                           | 43.8                | 1.67 (1H, m)                           |
| 31 | 87.1                |                                        | 87.1                |                                        |
| 32 | 21.4                | 1.22 (3H, s)                           | 21.4                | 1.22 (3H, s)                           |
| 33 | 29.3                | 1.06 (3H, s)                           | 29.3                | 1.06 (3H, s)                           |
| 34 | 30.3                | 1.78 (1H, m), 1.98 (1H, m)             | 30.3                | 1.78 (1H, m), 1.98 (1H, m)             |
| 35 | 122.7               | 5.06 (1H, br d, <i>J</i> = 6.1Hz)      | 122.7               | 5.04 (1H, br d, <i>J</i> = 6.1Hz)      |
| 36 | 133.6               |                                        | 133.6               |                                        |
| 37 | 26.1                | 1.67 (3H, s)                           | 26.1                | 1.67 (3H, s)                           |
| 38 | 18.2                | 1.54 (3H, s)                           | 18.2                | 1.54 (3H, s)                           |

**Table S11.** <sup>1</sup>H-NMR and <sup>13</sup>C-NMR of compound **12** (in pyridine-*d*<sub>5</sub>)

| No | <sup>13</sup> C-NMR | <sup>1</sup> H-NMR                                                             | No | <sup>13</sup> C-NMR | <sup>1</sup> H-NMR           |
|----|---------------------|--------------------------------------------------------------------------------|----|---------------------|------------------------------|
| 1  | 56.1                |                                                                                | 20 | 18.8                | 1.83 (3H, s)                 |
| 2  | 177.3               |                                                                                | 21 | 26.4                | 1.54 (3H, s)                 |
| 3  | 120.1               |                                                                                | 22 | 27.3                | 1.10 (3H, s)                 |
| 4  | 192.7               |                                                                                | 23 | 22.7                | 1.27 (3H, s)                 |
| 5  | 72.1                |                                                                                | 24 | 30.5                | 2.13 (1H, m); 2.08 (1H, m)   |
| 6  | 50.2                |                                                                                | 25 | 125.0               | 4.83 (1H, br s)              |
| 7  | 46.6                | 1.59 (1H, m)                                                                   | 26 | 132.9               |                              |
| 8  | 42.2                | 2.52 (1H, d, <i>J</i> = 14 Hz)<br>2.21 (1H, dd, <i>J</i> = 14.5, 7.0 Hz)       | 27 | 26.1                | 1.54 (3H, s)                 |
| 9  | 208.8               |                                                                                | 28 | 17.9                | 1.10 (3H, s)                 |
| 10 | 172.4               |                                                                                | 29 | 37.1                | 2.31 (1H, m)<br>2.05 (1H, m) |
| 11 | 119.0               |                                                                                | 30 | 44.3                | 2.61 (1H, m)                 |
| 12 | 110.1               | 8.19 (1H, s)                                                                   | 31 | 147.6               |                              |
| 13 | 148.3               |                                                                                | 32 | 112.9               | 4.41 (1H, s); 4.36 (1H, s)   |
| 14 | 155.1               |                                                                                | 33 | 18.0                | 1.66 (3H, s)                 |
| 15 | 104.6               | 7.45 (1H, s)                                                                   | 34 | 32.7                | 1.76 (1H, m); 1.58 (1H, m)   |
| 16 | 147.6               |                                                                                | 35 | 35.9                | 1.94 (2H, m)                 |
| 17 | 26.9                | 3.01 (1H, dd, <i>J</i> = 17, 7.0 Hz)<br>2.86 (1H, dd, <i>J</i> = 13.5, 6.5 Hz) | 36 | 146.1               |                              |
| 18 | 121.4               | 5.23 (1H, br s)                                                                | 37 | 22.9                | 1.71 (3H, s)                 |
| 19 | 134.3               |                                                                                | 38 | 110.1               | 4.77 (2H, s)                 |

**Table S12.** <sup>1</sup>H-NMR and <sup>13</sup>C-NMR of compound **13** (in pyridine-*d*<sub>5</sub>)

| No | <sup>13</sup> C-NMR | <sup>1</sup> H-NMR                                     | No | <sup>13</sup> C-NMR | <sup>1</sup> H-NMR              |
|----|---------------------|--------------------------------------------------------|----|---------------------|---------------------------------|
| 1  | 67.0                |                                                        | 18 | 119.7               | 5.00 (1H, br s)                 |
| 2  | 192.3               |                                                        | 19 | 135.3               |                                 |
| 3  | 118.5               |                                                        | 20 | 18.7                | 1.75 (3H, s)                    |
| 4  | 177.2               |                                                        | 21 | 26.1                | 1.31 (3H, s)                    |
| 5  | 63.4                |                                                        | 22 | 26.4                | 1.12 (3H, s)                    |
| 6  | 48.5                |                                                        | 23 | 21.5                | 1.21 (3H, s)                    |
| 7  | 47.2                | 1.52 (1H, m)                                           | 24 | 29.9                | 2.07 (1H, m); 1.88 (1H, m)      |
| 8  | 38.9                | 2.10 (1H, m)<br>2.39 (1H, dd, <i>J</i> = 14.5, 9.5 Hz) | 25 | 123.7               | 4.93 (1H, t, <i>J</i> = 6.5 Hz) |
| 9  | 207.1               |                                                        | 26 | 133.5               |                                 |
| 10 | 173.0               |                                                        | 27 | 18.2                | 1.51 (3H, s)                    |
| 11 | 118.1               |                                                        | 28 | 26.4                | 1.65 (3H, s)                    |
| 12 | 109.9               | 8.12 (1H, s)                                           | 29 | 29.8                | 2.90 (2H, m)                    |
| 13 | 148.1               |                                                        | 30 | 120.9               | 5.62 (1H, t, <i>J</i> = 7.0 Hz) |
| 14 | 155.7               |                                                        | 31 | 134.7               |                                 |
| 15 | 104.6               | 7.46 (1H, s)                                           | 32 | 18.3                | 1.65 (3H, s)                    |
| 16 | 150.8               |                                                        | 33 | 26.5                | 1.65 (3H, s)                    |
| 17 | 27.8                | 2.04 (2H, m)                                           |    |                     |                                 |

**Table S13.** <sup>1</sup>H-NMR and <sup>13</sup>C-NMR of compound **14** (in pyridine-*d*<sub>5</sub>)

| No | <sup>13</sup> C-NMR | <sup>1</sup> H-NMR                | No | <sup>13</sup> C-NMR | <sup>1</sup> H-NMR                    |
|----|---------------------|-----------------------------------|----|---------------------|---------------------------------------|
| 1  | 55.7                |                                   | 20 | 26.2                | 1.48 (3H, s)                          |
| 2  | 77.5                |                                   | 21 | 20.4                | 1.82 (3H, s)                          |
| 3  | 123.3               |                                   | 22 | 18.2                | 0.85 (3H, s)                          |
| 4  | 164.1               |                                   | 23 | 25.5                | 1.23 (3H, s)                          |
| 5  | 61.9                |                                   | 24 | 29.5                | 1.67 (1H, m); 2.12 (1H, m)            |
| 6  | 49.6                |                                   | 25 | 123.5               | 5.05 (1H, br t, <i>J</i> = 6.5 Hz)    |
| 7  | 44.0                | 2.14 (1H, m)                      | 26 | 133.4               |                                       |
| 8  | 40.2                | 1.22 (1H, m); 3.06 (1H, m)        | 27 | 26.2                | 1.56 (3H, s)                          |
| 9  | 211.4               |                                   | 28 | 18.2                | 1.52 (3H, s)                          |
| 10 | 178.7               |                                   | 29 | 37.6                | 1.52 (1H, m)                          |
|    |                     |                                   |    |                     | 2.35 (1H, dd, <i>J</i> = 13.8, 4.9Hz) |
| 11 | 116.7               |                                   | 30 | 39.4                | 2.91 (1H, m)                          |
| 12 | 108.7               | 8.09 (1H, s)                      | 31 | 147.4               |                                       |
| 13 | 148.2               |                                   | 32 | 48.5                | 2.20 (1H, br d, <i>J</i> = 13.3 Hz)   |
|    |                     |                                   |    |                     | 3.36 (1H, br d, <i>J</i> = 13.3 Hz)   |
| 14 | 156.1               |                                   | 33 | 109.7               | 4.93 (1H, br s); 4.96 (1H, br s)      |
| 15 | 104.2               | 7.45 (1H, s)                      | 34 | 32.0                | 2.18 (1H, m); 2.44(1H, m)             |
| 16 | 152.1               |                                   | 35 | 124.4               | 5.42 (1H, br t, <i>J</i> = 6.5 Hz)    |
| 17 | 28.0                | 3.02 (1H, m); 3.04 (1H, m)        | 36 | 132.3               |                                       |
| 18 | 120.4               | 5.00(1H, br t, <i>J</i> = 6.5 Hz) | 37 | 26.2                | 1.67 (3H, s)                          |
| 19 | 134.9               |                                   | 38 | 18.3                | 1.62 (3H, s)                          |
